# Supplementary material for: DAMTC regulates cytoskeletal reorganization and cell motility in human lung adenocarcinoma cell line: an integrated proteomics and transcriptomics approach
Source: PubMed Central journal article supplement — Cell Death Dis. 2012 Oct 11;3(10):e402–. doi: 10.1038/cddis.2012.141 (PMC3481129; doi:10.1038/cddis.2012.141), 2012-10-11

## Supplementary Tables

### Supplementary Table 1

List of genes differentially expressed in A549 cells after DAMTC treatment along with their fold changes

#### Upregulated Genes

| Gene Symbol | Definition                                                                                      | Fold Change |
|-------------|-------------------------------------------------------------------------------------------------|-------------|
| ABHD5       | abhydrolase domain containing 5 (ABHD5), mRNA.                                                  | 3.70        |
| ABTB2       | ankyrin repeat and BTB (POZ) domain containing 2 (ABTB2), mRNA.                                 | 3.53        |
| ACRC        | acidic repeat containing (ACRC), mRNA.                                                          | 4.14        |
| ADIPOR2     | adiponectin receptor 2 (ADIPOR2), mRNA.                                                         | 2.98        |
| ADM         | adrenomedullin (ADM), mRNA.                                                                     | 3.04        |
| ADPRHL2     | ADP-ribosylhydrolase like 2 (ADPRHL2), mRNA.                                                    | 3.70        |
| AFF4        | AF4/FMR2 family, member 4 (AFF4), mRNA.                                                         | 2.59        |
| AHR         | aryl hydrocarbon receptor (AHR), mRNA.                                                          | 0.87        |
| AK3L2       | adenylate kinase 3-like 2 (AK3L2), mRNA.                                                        | 3.57        |
| ALDOC       | aldolase C, fructose-bisphosphate (ALDOC), mRNA.                                                | 81.63       |
| ANKRD37     | ankyrin repeat domain 37 (ANKRD37), mRNA.                                                       | 9.66        |
| ANKZF1      | ankyrin repeat and zinc finger domain containing 1 (ANKZF1), mRNA.                              | 4.20        |
| ARID3B      | AT rich interactive domain 3B (BRIGHT- like) (ARID3B), mRNA.                                    | 4.83        |
| ARID4A      | AT rich interactive domain 4A (RBP1-like) (ARID4A), transcript variant 1, mRNA.                 | 2.98        |
| ARIH1       | ariadne homolog, ubiquitin-conjugating enzyme E2 binding protein, 1 (Drosophila) (ARIH1), mRNA. | 4.12        |
| ASRGL1      | asparaginase like 1 (ASRGL1), mRNA.                                                             | 3.62        |
| ATF2        | activating transcription factor 2 (ATF2), mRNA.                                                 | 3.98        |
| ATF7IP2     | activating transcription factor 7 interacting protein 2 (ATF7IP2), mRNA.                        | 2.30        |
| ATP6V0D1    | ATPase, H <sup>+</sup> transporting, lysosomal 38kDa, V0 subunit d isoform 1 (ATP6V0D1), mRNA.  | 2.63        |
| ATP6V1D     | ATPase, H <sup>+</sup> transporting, lysosomal 34kDa, V1 subunit D (ATP6V1D), mRNA.             | 2.75        |
| ATPBD1C     | ATP binding domain 1 family, member C (ATPBD1C), mRNA.                                          | 3.20        |
| AXUD1       | AXIN1 up-regulated 1 (AXUD1), mRNA.                                                             | 8.46        |

|           |                                                                                                             |      |
|-----------|-------------------------------------------------------------------------------------------------------------|------|
| BAG3      | BCL2-associated athanogene 3 (BAG3), mRNA.                                                                  | 3.26 |
| BCL10     | B-cell CLL/lymphoma 10 (BCL10), mRNA.                                                                       | 3.41 |
| BCL2L11   | BCL2-like 11 (apoptosis facilitator) (BCL2L11), transcript variant 6, mRNA.                                 | 5.97 |
| BIN3      | bridging integrator 3 (BIN3), mRNA.                                                                         | 3.22 |
| BMP2      | bone morphogenetic protein 2 (BMP2), mRNA.                                                                  | 3.74 |
| BMP6      | bone morphogenetic protein 6 (BMP6), mRNA.                                                                  | 3.60 |
| BNIP1     | BCL2/adenovirus E1B 19kDa interacting protein 1 (BNIP1), transcript variant BNIP1-a, mRNA.                  | 2.78 |
| BNIP3     | BCL2/adenovirus E1B 19kDa interacting protein 3 (BNIP3), nuclear gene encoding mitochondrial protein, mRNA. | 4.79 |
| BPNT1     | 3'(2'), 5'-bisphosphate nucleotidase 1 (BPNT1), mRNA.                                                       | 2.92 |
| BRF2      | BRF2, subunit of RNA polymerase III transcription initiation factor, BRF1-like (BRF2), mRNA.                | 3.74 |
| BRP44L    | brain protein 44-like (BRP44L), mRNA.                                                                       | 2.47 |
| BTBD5     | BTB (POZ) domain containing 5 (BTBD5), mRNA.                                                                | 6.66 |
| C10ORF35  | chromosome 10 open reading frame 35 (C10orf35), mRNA.                                                       | 2.25 |
| C10ORF56  | chromosome 10 open reading frame 56 (C10orf56), mRNA.                                                       | 4.69 |
| C12ORF24  | chromosome 12 open reading frame 24 (C12orf24), mRNA.                                                       | 2.47 |
| C12ORF45  | chromosome 12 open reading frame 45 (C12orf45), mRNA.                                                       | 2.25 |
| C12ORF5   | chromosome 12 open reading frame 5 (C12orf5), mRNA.                                                         | 3.50 |
| C13ORF7   | chromosome 13 open reading frame 7 (C13orf7), mRNA.                                                         | 2.70 |
| C16ORF52  | chromosome 16 open reading frame 52 (C16orf52), mRNA.                                                       | 4.56 |
| C16ORF80  | chromosome 16 open reading frame 80 (C16orf80), mRNA.                                                       | 5.15 |
| C18ORF19  | chromosome 18 open reading frame 19 (C18orf19), mRNA.                                                       | 5.68 |
| C18ORF21  | chromosome 18 open reading frame 21 (C18orf21), mRNA.                                                       | 2.41 |
| C18ORF8   | chromosome 18 open reading frame 8 (C18orf8), mRNA.                                                         | 2.45 |
| C1ORF121  | chromosome 1 open reading frame 121 (C1orf121), mRNA.                                                       | 2.44 |
| C1ORF128  | chromosome 1 open reading frame 128 (C1orf128), mRNA.                                                       | 5.89 |
| C1ORF55   | chromosome 1 open reading frame 55 (C1orf55), mRNA.                                                         | 2.48 |
| C1ORF63   | chromosome 1 open reading frame 63 (C1orf63), mRNA.                                                         | 3.47 |
| C20ORF111 | chromosome 20 open reading frame 111 (C20orf111), mRNA.                                                     | 4.58 |
| C21ORF91  | chromosome 21 open reading frame 91 (C21orf91), mRNA.                                                       | 4.30 |
| C2ORF7    | chromosome 2 open reading frame 7 (C2orf7), mRNA.                                                           | 6.85 |
| C3ORF14   | chromosome 3 open reading frame 14 (C3orf14), mRNA.                                                         | 3.05 |
| C3ORF28   | chromosome 3 open reading frame 28 (C3orf28), mRNA.                                                         | 7.18 |
| C3ORF38   | chromosome 3 open reading frame 38 (C3orf38), mRNA.                                                         | 2.48 |
| C3ORF52   | chromosome 3 open reading frame 52 (C3orf52), mRNA.                                                         | 3.35 |
| C3ORF58   | chromosome 3 open reading frame 58 (C3orf58), mRNA.                                                         | 4.38 |
| C6ORF204  | chromosome 6 open reading frame 204 (C6orf204), transcript variant 1, mRNA.                                 | 5.18 |

|         |                                                                                                       |       |
|---------|-------------------------------------------------------------------------------------------------------|-------|
| C8ORF41 | chromosome 8 open reading frame 41 (C8orf41), mRNA.                                                   | 2.48  |
| C8ORF70 | chromosome 8 open reading frame 70 (C8orf70), mRNA.                                                   | 2.93  |
| C9ORF32 | chromosome 9 open reading frame 32 (C9orf32), mRNA.                                                   | 3.00  |
| C9ORF45 | chromosome 9 open reading frame 45 (C9orf45), mRNA.                                                   | 5.16  |
| C9ORF80 | chromosome 9 open reading frame 80 (C9orf80), mRNA.                                                   | 0.90  |
| CABC1   | chaperone, ABC1 activity of bc1 complex like ( <i>S. pombe</i> ) (CABC1), mRNA.                       | 2.39  |
| CARF    | CDKN2A interacting protein (CDKN2AIP), mRNA.                                                          | 4.68  |
| CBR3    | carbonyl reductase 3 (CBR3), mRNA.                                                                    | 3.32  |
| CCDC28A | coiled-coil domain containing 28A (CCDC28A), mRNA.                                                    | 2.62  |
| CCNG2   | cyclin G2 (CCNG2), mRNA.                                                                              | 4.65  |
| CCNYL1  | cyclin Y-like 1 (CCNYL1), mRNA.                                                                       | 2.71  |
| CCRN4L  | CCR4 carbon catabolite repression 4-like ( <i>S. cerevisiae</i> ) (CCRN4L), mRNA.                     | 7.89  |
| CD83    | CD83 molecule (CD83), transcript variant 1, mRNA.                                                     | 8.45  |
| CDC34   | cell division cycle 34 homolog ( <i>S. cerevisiae</i> ) (CDC34), mRNA.                                | 3.28  |
| CDC37L1 | cell division cycle 37 homolog ( <i>S. cerevisiae</i> )-like 1 (CDC37L1), mRNA.                       | 2.80  |
| CDCA2   | cell division cycle associated 2 (CDCA2), mRNA.                                                       | 10.59 |
| CDK5R1  | cyclin-dependent kinase 5, regulatory subunit 1 (p35) (CDK5R1), mRNA.                                 | 3.74  |
| CDK7    | cyclin-dependent kinase 7 (MO15 homolog, <i>Xenopus laevis</i> , cdk-activating kinase) (CDK7), mRNA. | 3.06  |
| CEP68   | centrosomal protein 68kDa (CEP68), mRNA.                                                              | 3.61  |
| CGGBP1  | CGG triplet repeat binding protein 1 (CGGBP1), transcript variant 1, mRNA.                            | 1.62  |
| CHCHD7  | coiled-coil-helix-coiled-coil-helix domain containing 7 (CHCHD7), transcript variant 2, mRNA.         | 11.80 |
| CHIC2   | cysteine-rich hydrophobic domain 2 (CHIC2), mRNA.                                                     | 3.44  |
| CHMP4C  | chromatin modifying protein 4C (CHMP4C), mRNA.                                                        | 2.51  |
| CIR     | CBF1 interacting corepressor (CIR), mRNA.                                                             | 2.65  |
| CITED2  | Cbp/p300-interacting transactivator, with Glu/Asp-rich carboxy-terminal domain, 2 (CITED2), mRNA.     | 3.19  |
| CKB     | creatine kinase, brain (CKB), mRNA.                                                                   | 13.57 |
| CKS2    | CDC28 protein kinase regulatory subunit 2 (CKS2), mRNA.                                               | 3.02  |
| CLDN12  | claudin 12 (CLDN12), mRNA.                                                                            | 2.29  |
| CLDND1  | claudin domain containing 1 (CLDND1), mRNA.                                                           | 2.83  |
| CLK3    | CDC-like kinase 3 (CLK3), transcript variant phclk3/152, mRNA.                                        | 3.46  |
| CNKSR3  | CNKSR family member 3 (CNKSR3), mRNA.                                                                 | 2.20  |
| CNNM4   | cyclin M4 (CNNM4), mRNA.                                                                              | 5.69  |
| COQ10B  | coenzyme Q10 homolog B ( <i>S. cerevisiae</i> ) (COQ10B), mRNA.                                       | 2.62  |
| CPA4    | carboxypeptidase A4 (CPA4), mRNA.                                                                     | 6.32  |

|              |                                                                                                |       |
|--------------|------------------------------------------------------------------------------------------------|-------|
| CPEB3        | cytoplasmic polyadenylation element binding protein 3 (CPEB3), mRNA.                           | 3.49  |
| CRABP2       | cellular retinoic acid binding protein 2 (CRABP2), mRNA.                                       | 10.64 |
| CRISPLD2     | cysteine-rich secretory protein LCCL domain containing 2 (CRISPLD2), mRNA.                     | 2.70  |
| CRLF3        | cytokine receptor-like factor 3 (CRLF3), mRNA.                                                 | 2.21  |
| CRY2         | cryptochrome 2 (photolyase-like) (CRY2), mRNA.                                                 | 9.37  |
| CRYM         | crystallin, mu (CRYM), transcript variant 2, mRNA.                                             | 5.46  |
| CSRP2        | cysteine and glycine-rich protein 2 (CSRP2), mRNA.                                             | 13.71 |
| CTH          | cystathionase (cystathionine gamma-lyase) (CTH), transcript variant 1, mRNA.                   | 3.50  |
| CTR9         | Ctr9, Paf1/RNA polymerase II complex component, homolog (S. cerevisiae) (CTR9), mRNA.          | 5.13  |
| CTSL2        | cathepsin L2 (CTSL2), mRNA.                                                                    | 9.34  |
| CXORF26      | chromosome X open reading frame 26 (CXorf26), mRNA.                                            | 2.47  |
| CXORF33      | chromosome X open reading frame 33 (CXorf33), mRNA.                                            | 2.39  |
| CYCS         | cytochrome c, somatic (CYCS), nuclear gene encoding mitochondrial protein, mRNA.               | 2.95  |
| DCPIA        | decapping enzyme (DCPIA), mRNA.                                                                | 2.85  |
| DCTN5        | dynactin 5 (p25) (DCTN5), mRNA.                                                                | 2.98  |
| DC-UBP       | dendritic cell-derived ubiquitin-like protein (DC-UbP), mRNA.                                  | 5.30  |
| DCXR         | dicarbonyl/L-xylulose reductase (DCXR), mRNA.                                                  | 4.38  |
| DDX48        | eukaryotic translation initiation factor 4A, isoform 3 (EIF4A3), mRNA.                         | 4.06  |
| DKFZP564K142 | implantation-associated protein (DKFZp564K142), mRNA.                                          | 2.62  |
| DNAJA1       | DnaJ (Hsp40) homolog, subfamily A, member 1 (DNAJA1), mRNA.                                    | 3.09  |
| DNAJB1       | DnaJ (Hsp40) homolog, subfamily B, member 1 (DNAJB1), mRNA.                                    | 2.82  |
| DNAJC5       | DnaJ (Hsp40) homolog, subfamily C, member 5 (DNAJC5), mRNA.                                    | 2.40  |
| DUSP14       | dual specificity phosphatase 14 (DUSP14), mRNA.                                                | 3.67  |
| DUSP8        | dual specificity phosphatase 8 (DUSP8), mRNA.                                                  | 2.54  |
| EAF1         | ELL associated factor 1 (EAF1), mRNA.                                                          | 2.45  |
| EED          | embryonic ectoderm development (EED), transcript variant 2, mRNA.                              | 1.69  |
| EFHD1        | EF-hand domain family, member D1 (EFHD1), mRNA.                                                | 3.62  |
| EFNB2        | ephrin-B2 (EFNB2), mRNA.                                                                       | 29.55 |
| EGLN1        | egl nine homolog 1 (C. elegans) (EGLN1), mRNA.                                                 | 9.86  |
| EIF1B        | eukaryotic translation initiation factor 1B (EIF1B), mRNA.                                     | 2.16  |
| EIF4EBP2     | eukaryotic translation initiation factor 4E binding protein 2 (EIF4EBP2), mRNA.                | 3.78  |
| ELL2         | elongation factor, RNA polymerase II, 2 (ELL2), mRNA.                                          | 4.42  |
| ELOVL4       | elongation of very long chain fatty acids (FEN1/Elo2, SUR4/Elo3, yeast)-like 4 (ELOVL4), mRNA. | 3.44  |
| ENO2         | enolase 2 (gamma, neuronal) (ENO2), mRNA.                                                      | 7.86  |

|           |                                                                                                                   |       |
|-----------|-------------------------------------------------------------------------------------------------------------------|-------|
| ERO1L     | ERO1-like ( <i>S. cerevisiae</i> ) (ERO1L), mRNA.                                                                 | 3.33  |
| ERRFI1    | ERBB receptor feedback inhibitor 1 (ERRFI1), mRNA.                                                                | 2.28  |
| EZH2      | enhancer of zeste homolog 2 ( <i>Drosophila</i> ) (EZH2), transcript variant 2, mRNA.                             | 3.65  |
| FAM100B   | family with sequence similarity 100, member B (FAM100B), mRNA.                                                    | 4.79  |
| FAM103A1  | family with sequence similarity 103, member A1 (FAM103A1), mRNA.                                                  | 2.07  |
| FAM126B   | family with sequence similarity 126, member B (FAM126B), mRNA.                                                    | 4.68  |
| FAM130A1  | family with sequence similarity 130, member A1 (FAM130A1), mRNA.                                                  | 2.19  |
| FAM46A    | family with sequence similarity 46, member A (FAM46A), mRNA.                                                      | 3.48  |
| FAM53C    | family with sequence similarity 53, member C (FAM53C), mRNA.                                                      | 7.90  |
| FAM59A    | family with sequence similarity 59, member A (FAM59A), mRNA.                                                      | 4.53  |
| FAM80A    | family with sequence similarity 80, member A (FAM80A), mRNA.                                                      | 17.18 |
| FAM80B    | family with sequence similarity 80, member B (FAM80B), mRNA.                                                      | 3.39  |
| FAM91A1   | family with sequence similarity 91, member A1 (FAM91A1), mRNA.                                                    | 3.90  |
| FBXL12    | F-box and leucine-rich repeat protein 12 (FBXL12), mRNA.                                                          | 2.75  |
| FBXL20    | F-box and leucine-rich repeat protein 20 (FBXL20), mRNA.                                                          | 2.73  |
| FBXO33    | F-box protein 33 (FBXO33), mRNA.                                                                                  | 4.65  |
| FBXO6     | F-box protein 6 (FBXO6), mRNA.                                                                                    | 2.47  |
| FER       | fer (fps/fes related) tyrosine kinase (phosphoprotein NCP94) (FER), mRNA.                                         | 2.74  |
| FGFR1OP2  | FGFR1 oncogene partner 2 (FGFR1OP2), mRNA.                                                                        | 4.82  |
| FGFR3     | fibroblast growth factor receptor 3 (achondroplasia, thanatophoric dwarfism) (FGFR3), transcript variant 1, mRNA. | 15.77 |
| FLJ12078  | PREDICTED: hypothetical protein FLJ12078 (FLJ12078), misc RNA.                                                    | 2.80  |
| FLJ20366  | hypothetical protein FLJ20366 (FLJ20366), mRNA.                                                                   | 2.20  |
| FLJ21106  | hypothetical protein FLJ21106 (FLJ21106), mRNA.                                                                   | 6.23  |
| FLJ21945  | chromosome 2 open reading frame 44 (C2orf44), mRNA.                                                               | 2.31  |
| FLJ39575  | hypothetical protein FLJ39575 (FLJ39575), mRNA.                                                                   | 12.19 |
| FNBP1     | formin binding protein 1 (FNBP1), mRNA.                                                                           | 2.72  |
| FOSL1     | FOS-like antigen 1 (FOSL1), mRNA.                                                                                 | 3.21  |
| FOXD1     | forkhead box D1 (FOXD1), mRNA.                                                                                    | 4.67  |
| FRAT2     | frequently rearranged in advanced T-cell lymphomas 2 (FRAT2), mRNA.                                               | 2.39  |
| FZD1      | frizzled homolog 1 ( <i>Drosophila</i> ) (FZD1), mRNA.                                                            | 3.05  |
| FZD7      | frizzled homolog 7 ( <i>Drosophila</i> ) (FZD7), mRNA.                                                            | 2.26  |
| G10       | BUD31 homolog ( <i>S. cerevisiae</i> ) (BUD31), mRNA.                                                             | 2.76  |
| GABARAPL1 | GABA(A) receptor-associated protein like 1 (GABARAPL1), mRNA.                                                     | 3.12  |
| GADD45A   | growth arrest and DNA-damage-inducible, alpha (GADD45A), mRNA.                                                    | 3.02  |

|           |                                                                                                                                   |       |
|-----------|-----------------------------------------------------------------------------------------------------------------------------------|-------|
| GCA       | grancalcin, EF-hand calcium binding protein (GCA), mRNA.                                                                          | 3.18  |
| GCAT      | glycine C-acetyltransferase (2-amino-3-ketobutyrate coenzyme A ligase) (GCAT), nuclear gene encoding mitochondrial protein, mRNA. | 3.54  |
| GCH1      | GTP cyclohydrolase 1 (dopa-responsive dystonia) (GCH1), transcript variant 1, mRNA.                                               | 4.26  |
| GEM       | GTP binding protein overexpressed in skeletal muscle (GEM), transcript variant 1, mRNA.                                           | 4.12  |
| GGA2      | golgi associated, gamma adaptin ear containing, ARF binding protein 2 (GGA2), mRNA.                                               | 2.22  |
| GLCE      | glucuronic acid epimerase (GLCE), mRNA.                                                                                           | 2.28  |
| GLTP      | glycolipid transfer protein (GLTP), mRNA.                                                                                         | 2.79  |
| GNAI2     | guanine nucleotide binding protein (G protein), alpha inhibiting activity polypeptide 2 (GNAI2), mRNA.                            | 2.83  |
| GNAQ      | guanine nucleotide binding protein (G protein), q polypeptide (GNAQ), mRNA.                                                       | 2.81  |
| GNPDA2    | glucosamine-6-phosphate deaminase 2 (GNPDA2), mRNA.                                                                               | 2.82  |
| GPX3      | glutathione peroxidase 3 (plasma) (GPX3), mRNA.                                                                                   | 3.07  |
| GRPEL1    | GrpE-like 1, mitochondrial (E. coli) (GRPEL1), mRNA.                                                                              | 3.78  |
| GTF2B     | general transcription factor IIB (GTF2B), mRNA.                                                                                   | 4.99  |
| GTF3C5    | general transcription factor IIIC, polypeptide 5, 63kDa (GTF3C5), mRNA.                                                           | 2.53  |
| GUK1      | guanylate kinase 1 (GUK1), mRNA.                                                                                                  | 3.07  |
| GYS1      | glycogen synthase 1 (muscle) (GYS1), mRNA.                                                                                        | 5.84  |
| HBEGF     | heparin-binding EGF-like growth factor (HBEGF), mRNA.                                                                             | 13.66 |
| HCFC2     | host cell factor C2 (HCFC2), mRNA.                                                                                                | 3.12  |
| HDAC3     | histone deacetylase 3 (HDAC3), mRNA.                                                                                              | 3.20  |
| HECA      | headcase homolog (Drosophila) (HECA), mRNA.                                                                                       | 3.28  |
| HELZ      | helicase with zinc finger (HELZ), mRNA.                                                                                           | 2.80  |
| HIC2      | hypermethylated in cancer 2 (HIC2), mRNA.                                                                                         | 4.66  |
| HK2       | hexokinase 2 (HK2), mRNA.                                                                                                         | 54.35 |
| HLA-A     | major histocompatibility complex, class I, A (HLA-A), mRNA.                                                                       | 2.59  |
| HLA-B     | major histocompatibility complex, class I, B (HLA-B), mRNA.                                                                       | 3.84  |
| HLA-E     | major histocompatibility complex, class I, E (HLA-E), mRNA.                                                                       | 2.97  |
| HLA-H     | major histocompatibility complex, class I, H (pseudogene) (HLA-H) on chromosome 6.                                                | 2.78  |
| HMGCR     | 3-hydroxy-3-methylglutaryl-Coenzyme A reductase (HMGCR), mRNA.                                                                    | 2.83  |
| HN1       | hematological and neurological expressed 1 (HN1), transcript variant 1, mRNA.                                                     | 3.33  |
| HNRPDL    | heterogeneous nuclear ribonucleoprotein D-like (HNRPDL), transcript variant 2, mRNA.                                              | 3.13  |
| HPS1      | Hermansky-Pudlak syndrome 1 (HPS1), transcript variant 3, mRNA.                                                                   | 3.51  |
| HS.283402 | cDNA clone IMAGE:5272804                                                                                                          | 2.44  |
| HS.354359 | cDNA clone IMAGE:5300199                                                                                                          | 4.59  |

|           |                                                                                             |       |
|-----------|---------------------------------------------------------------------------------------------|-------|
| HS.371060 | BX093763 Soares_fetal_heart_NbHH19W cDNA clone<br>IMAGp998N10870, mRNA sequence             | 4.01  |
| HS.374278 | cDNA FLJ38388 fis, clone FEBRA2004485                                                       | 4.34  |
| HS.415576 | cDNA FLJ25252 fis, clone STM03814                                                           | 3.28  |
| HS.481659 | cDNA FLJ27196 fis, clone SYN02831                                                           | 2.75  |
| HS.482960 | partial mRNA; ID YG39-1C                                                                    | 4.59  |
| HS.493947 | cDNA FLJ41455 fis, clone BRSTN2012284                                                       | 4.12  |
| HS.4988   | mRNA; cDNA DKFZp686B24166 (from clone DKFZp686B24166)                                       | 2.87  |
| HS.534279 | , clone IMAGE:3905596, mRNA                                                                 | 3.19  |
| HS.537779 | BP398340 pancreatic islet cDNA clone htp-29-07 3, mRNA<br>sequence                          | 4.01  |
| HS.551847 | 601452348F1 NIH_MGC_66 cDNA clone IMAGE:3856355 5,<br>mRNA sequence                         | 4.87  |
| HS.564805 | 602976638F1 NIH_MGC_12 cDNA clone IMAGE:5115800 5,<br>mRNA sequence                         | 2.98  |
| HSPA4L    | heat shock 70kDa protein 4-like (HSPA4L), mRNA.                                             | 3.94  |
| HSZFP36   | PREDICTED: ZFP-36 for a zinc finger protein (HSZFP36), mRNA.                                | 5.65  |
| IBRDC3    | IBR domain containing 3 (IBRDC3), mRNA.                                                     | 4.03  |
| IL1A      | interleukin 1, alpha (IL1A), mRNA.                                                          | 3.67  |
| IMPA1     | inositol(myo)-1(or 4)-monophosphatase 1 (IMPA1), mRNA.                                      | 2.28  |
| INSIG1    | insulin induced gene 1 (INSIG1), transcript variant 1, mRNA.                                | 3.74  |
| IRS2      | insulin receptor substrate 2 (IRS2), mRNA.                                                  | 2.29  |
| IRX2      | iroquois homeobox protein 2 (IRX2), mRNA.                                                   | 5.80  |
| IRX5      | iroquois homeobox protein 5 (IRX5), mRNA.                                                   | 6.61  |
| ISG15     | ISG15 ubiquitin-like modifier (ISG15), mRNA.                                                | 3.60  |
| ISG20     | interferon stimulated exonuclease gene 20kDa (ISG20), mRNA.                                 | 5.11  |
| ISG20L1   | interferon stimulated exonuclease gene 20kDa-like 1 (ISG20L1),<br>mRNA.                     | 3.26  |
| JMJD1A    | jumonji domain containing 1A (JMJD1A), mRNA.                                                | 5.89  |
| KATNA1    | katanin p60 (ATPase-containing) subunit A 1 (KATNA1), mRNA.                                 | 3.85  |
| KCNS3     | potassium voltage-gated channel, delayed-rectifier, subfamily S,<br>member 3 (KCNS3), mRNA. | 3.13  |
| KCTD5     | potassium channel tetramerisation domain containing 5 (KCTD5),<br>mRNA.                     | 2.53  |
| KHDRBS3   | KH domain containing, RNA binding, signal transduction associated<br>3 (KHDRBS3), mRNA.     | 34.93 |
| KIAA0241  | KIAA0241 (KIAA0241), mRNA.                                                                  | 2.48  |
| KIAA0247  | KIAA0247 (KIAA0247), mRNA.                                                                  | 4.33  |
| KIAA0674  | PREDICTED: KIAA0674 (KIAA0674), mRNA.                                                       | 2.61  |
| KIAA0907  | KIAA0907 (KIAA0907), mRNA.                                                                  | 3.00  |
| KIAA1219  | KIAA1219 protein (KIAA1219), mRNA.                                                          | 3.45  |
| KIAA1467  | KIAA1467 (KIAA1467), mRNA.                                                                  | 3.22  |

|           |                                                                                                                   |       |
|-----------|-------------------------------------------------------------------------------------------------------------------|-------|
| KLHL18    | kelch-like 18 (Drosophila) (KLHL18), mRNA.                                                                        | 3.17  |
| KLHL21    | kelch-like 21 (Drosophila) (KLHL21), mRNA.                                                                        | 3.85  |
| LATS2     | LATS, large tumor suppressor, homolog 2 (Drosophila) (LATS2), mRNA.                                               | 2.46  |
| LHX2      | LIM homeobox 2 (LHX2), mRNA.                                                                                      | 4.48  |
| LIFR      | leukemia inhibitory factor receptor (LIFR), mRNA.                                                                 | 2.63  |
| LIN10     | chromosome 16 open reading frame 70 (C16orf70), mRNA.                                                             | 2.39  |
| LINCR     | likely ortholog of mouse lung-inducible Neutralized-related C3HC4 RING domain protein (LINCR), mRNA.              | 8.45  |
| LINS1     | lines homolog 1 (Drosophila) (LINS1), transcript variant 4, mRNA.                                                 | 2.49  |
| LIPT1     | lipoyltransferase 1 (LIPT1), transcript variant 1, mRNA.                                                          | 3.95  |
| LNK2      | ligand of numb-protein X 2 (LNK2), mRNA.                                                                          | 2.94  |
| LOC129138 | ankyrin repeat domain 54 (ANKRD54), mRNA.                                                                         | 3.78  |
| LOC147804 | hypothetical protein LOC147804 (LOC147804), mRNA.                                                                 | 2.56  |
| LOC153222 | adult retina protein (LOC153222), mRNA.                                                                           | 2.61  |
| LOC283464 | PREDICTED: hypothetical protein LOC283464 (LOC283464), mRNA.                                                      | 3.19  |
| LOC346887 | PREDICTED: similar to solute carrier family 16 (monocarboxylic acid transporters), member 14 (LOC346887), mRNA.   | 13.70 |
| LOC388272 | similar to RIKEN cDNA 4921524J17 (LOC388272), mRNA.                                                               | 3.24  |
| LOC389672 | PREDICTED: similar to 40S ribosomal protein SA (p40) (34/67 kDa laminin receptor), mRNA.                          | 2.43  |
| LOC391692 | PREDICTED: similar to tubulin, beta 8 (LOC391692), mRNA.                                                          | 3.11  |
| LOC641992 | PREDICTED: similar to cell division cycle 42 (LOC641992), mRNA.                                                   | 2.23  |
| LOC643025 | PREDICTED: similar to Probable phosphoglycerate mutase 4, transcript variant 1 (LOC643025), mRNA.                 | 3.74  |
| LOC643031 | PREDICTED: similar to NADH dehydrogenase subunit 5 (LOC643031), mRNA.                                             | 2.61  |
| LOC643554 | PREDICTED: similar to Ornithine aminotransferase, (LOC643554), mRNA.                                              | 2.97  |
| LOC645058 | PREDICTED: similar to hepatitis B virus x-interacting protein (LOC645058), mRNA.                                  | 2.32  |
| LOC645385 | PREDICTED: similar to heterogeneous nuclear ribonucleoprotein A1 (LOC645385), mRNA.                               | 2.81  |
| LOC645436 | PREDICTED: similar to Heterogeneous nuclear ribonucleoprotein A1 (Helix-destabilizing protein), mRNA.             | 2.67  |
| LOC646123 | PREDICTED: hypothetical protein LOC646123 (LOC646123), mRNA.                                                      | 2.81  |
| LOC646463 | PREDICTED: similar to Ubiquitin-conjugating enzyme E2 H (Ubiquitin-protein ligase H), mRNA.                       | 2.58  |
| LOC648210 | PREDICTED: similar to Heterogeneous nuclear ribonucleoprotein A1 (Helix-destabilizing protein) (LOC648210), mRNA. | 2.78  |
| LOC649422 | PREDICTED: hypothetical protein LOC649422 (LOC649422), mRNA.                                                      | 3.07  |
| LOC649639 | PREDICTED: hypothetical protein LOC649639 (LOC649639), mRNA.                                                      | 3.26  |



|           |                                                                                                                                      |       |
|-----------|--------------------------------------------------------------------------------------------------------------------------------------|-------|
| LOC649708 | PREDICTED: similar to Chloride intracellular channel protein 4 (Intracellular chloride ion channel protein p64H1) (LOC649708), mRNA. | 4.16  |
| LOC650304 | PREDICTED: similar to MAPK-interacting and spindle-stabilizing protein (LOC650304), mRNA.                                            | 4.28  |
| LOC650526 | PREDICTED: similar to Importin alpha-2 subunit (Karyopherin alpha-2 subunit) (SRP1-alpha), mRNA.                                     | 3.73  |
| LOC650832 | PREDICTED: similar to mitogen-activated protein kinase kinase 3 isoform A (LOC650832), mRNA.                                         | 3.55  |
| LOC651423 | PREDICTED: similar to mitogen-activated protein kinase kinase 3 isoform A (LOC651423), mRNA.                                         | 3.38  |
| LOC651816 | PREDICTED: similar to Ubiquitin-conjugating enzyme E2S (Ubiquitin-conjugating enzyme E2-24 kDa), mRNA.                               | 2.98  |
| LOC653108 | PREDICTED: similar to coxsackie virus and adenovirus receptor (LOC653108), mRNA.                                                     | 12.46 |
| LOC653171 | PREDICTED: similar to MAPK-interacting and spindle-stabilizing protein (LOC653171), mRNA.                                            | 4.56  |
| LOC91614  | novel 58.3 KDA protein (LOC91614), mRNA.                                                                                             | 7.89  |
| LPIN1     | lipin 1 (LPIN1), mRNA.                                                                                                               | 2.72  |
| LRP5L     | low density lipoprotein receptor-related protein 5-like (LRP5L), mRNA.                                                               | 3.98  |
| LRRC8C    | leucine rich repeat containing 8 family, member C (LRRC8C), mRNA.                                                                    | 3.28  |
| LRRC8E    | leucine rich repeat containing 8 family, member E (LRRC8E), mRNA.                                                                    | 2.89  |
| MAFF      | v-maf musculoaponeurotic fibrosarcoma oncogene homolog F (avian) (MAFF), transcript variant 1, mRNA.                                 | 3.25  |
| MAP2K1    | mitogen-activated protein kinase kinase 1 (MAP2K1), mRNA.                                                                            | 2.66  |
| MAPRE2    | microtubule-associated protein, RP/EB family, member 2 (MAPRE2), mRNA.                                                               | 3.19  |
| MARCKSL1  | MARCKS-like 1 (MARCKSL1), mRNA.                                                                                                      | 2.63  |
| MBD1      | methyl-CpG binding domain protein 1 (MBD1), transcript variant 3, mRNA.                                                              | 3.07  |
| MBIP      | MAP3K12 binding inhibitory protein 1 (MBIP), mRNA.                                                                                   | 2.46  |
| MED19     | mediator complex subunit 19 (MED19), mRNA.                                                                                           | 3.76  |
| MFAP3     | microfibrillar-associated protein 3 (MFAP3), mRNA.                                                                                   | 2.82  |
| MGC26963  | sphingomyelin synthase 2 (MGC26963), mRNA.                                                                                           | 8.37  |
| MGC3121   | proline rich 14 (PRR14), mRNA.                                                                                                       | 3.70  |
| MGC40405  | hypothetical protein MGC40405 (MGC40405), mRNA.                                                                                      | 1.87  |
| MGC5509   | chromosome 2 open reading frame 49 (C2orf49), mRNA.                                                                                  | 3.43  |
| MICA      | MHC class I polypeptide-related sequence A (MICA), mRNA.                                                                             | 4.36  |
| MICB      | MHC class I polypeptide-related sequence B (MICB), mRNA.                                                                             | 3.95  |
| MLF1      | myeloid leukemia factor 1 (MLF1), mRNA.                                                                                              | 4.29  |
| MRPS30    | mitochondrial ribosomal protein S30 (MRPS30), nuclear gene encoding mitochondrial protein, mRNA.                                     | 2.45  |

|        |                                                                                                                                     |       |
|--------|-------------------------------------------------------------------------------------------------------------------------------------|-------|
| MXD1   | MAX dimerization protein 1 (MXD1), mRNA.                                                                                            | 6.15  |
| MYLIP  | myosin regulatory light chain interacting protein (MYLIP), mRNA.                                                                    | 11.17 |
| NAPG   | N-ethylmaleimide-sensitive factor attachment protein, gamma (NAPG), mRNA.                                                           | 3.14  |
| NARF   | nuclear prelamin A recognition factor (NARF), transcript variant 3, mRNA.                                                           | 4.14  |
| NAT12  | N-acetyltransferase 12 (NAT12), mRNA.                                                                                               | 3.78  |
| NCALD  | neurocalcin delta (NCALD), transcript variant 3, mRNA.                                                                              | 7.84  |
| NCBP2  | nuclear cap binding protein subunit 2, 20kDa (NCBP2), mRNA.                                                                         | 1.43  |
| NDEL1  | nudE nuclear distribution gene E homolog (A. nidulans)-like 1 (NDEL1), transcript variant 2, mRNA.                                  | 2.45  |
| NDRG1  | N-myc downstream regulated gene 1 (NDRG1), mRNA.                                                                                    | 6.18  |
| NEU1   | sialidase 1 (lysosomal sialidase) (NEU1), mRNA.                                                                                     | 5.54  |
| NFIL3  | nuclear factor, interleukin 3 regulated (NFIL3), mRNA.                                                                              | 3.03  |
| NFKBIE | nuclear factor of kappa light polypeptide gene enhancer in B-cells inhibitor, epsilon (NFKBIE), mRNA.                               | 3.31  |
| NGDN   | neuroguidin, EIF4E binding protein (NGDN), transcript variant 1, mRNA.                                                              | 1.15  |
| NP     | nucleoside phosphorylase (NP), mRNA.                                                                                                | 2.75  |
| NRAS   | neuroblastoma RAS viral (v-ras) oncogene homolog (NRAS), mRNA.                                                                      | 2.33  |
| NRIP3  | nuclear receptor interacting protein 3 (NRIP3), mRNA.                                                                               | 37.58 |
| NXF1   | nuclear RNA export factor 1 (NXF1), mRNA.                                                                                           | 6.72  |
| OAT    | ornithine aminotransferase (gyrate atrophy) (OAT), nuclear gene encoding mitochondrial protein, mRNA.                               | 2.87  |
| OGFRL1 | opioid growth factor receptor-like 1 (OGFRL1), mRNA.                                                                                | 3.32  |
| OSAP   | ovary-specific acidic protein (OSAP), mRNA.                                                                                         | 3.89  |
| OSBPL6 | oxysterol binding protein-like 6 (OSBPL6), transcript variant 1, mRNA.                                                              | 3.35  |
| OSBPL8 | oxysterol binding protein-like 8 (OSBPL8), transcript variant 1, mRNA.                                                              | 1.96  |
| OSTF1  | osteoclast stimulating factor 1 (OSTF1), mRNA.                                                                                      | 2.83  |
| P4HA1  | procollagen-proline, 2-oxoglutarate 4-dioxygenase (proline 4-hydroxylase), alpha polypeptide I (P4HA1), transcript variant 2, mRNA. | 3.84  |
| PAG1   | phosphoprotein associated with glycosphingolipid microdomains 1 (PAG1), mRNA.                                                       | 9.93  |
| PAPD5  | PAP associated domain containing 5 (PAPD5), mRNA.                                                                                   | 2.51  |
| PCSK5  | proprotein convertase subtilisin/kexin type 5 (PCSK5), mRNA.                                                                        | 2.96  |
| PCTP   | phosphatidylcholine transfer protein (PCTP), mRNA.                                                                                  | 2.90  |
| PDK3   | pyruvate dehydrogenase kinase, isozyme 3 (PDK3), mRNA.                                                                              | 6.74  |
| PDRG1  | p53 and DNA damage regulated 1 (PDRG1), mRNA.                                                                                       | 3.61  |
| PDXP   | pyridoxal (pyridoxine, vitamin B6) phosphatase (PDXP), mRNA.                                                                        | 8.28  |
| PEG10  | paternally expressed 10 (PEG10), transcript variant 1, mRNA.<br>XM_940378                                                           | 2.25  |

|          |                                                                                                               |       |
|----------|---------------------------------------------------------------------------------------------------------------|-------|
| PELI1    | pellino homolog 1 (Drosophila) (PELI1), mRNA.                                                                 | 18.06 |
| PEX11A   | peroxisomal biogenesis factor 11A (PEX11A), mRNA.                                                             | 2.86  |
| PFKFB3   | 6-phosphofructo-2-kinase/fructose-2,6-biphosphatase 3 (PFKFB3), mRNA.                                         | 2.92  |
| PFKFB4   | 6-phosphofructo-2-kinase/fructose-2,6-biphosphatase 4 (PFKFB4), mRNA.                                         | 3.56  |
| PGAM4    | phosphoglycerate mutase family member 4 (PGAM4), mRNA.                                                        | 2.79  |
| PGBD3    | piggyBac transposable element derived 3 (PGBD3), mRNA.                                                        | 2.82  |
| PGK1     | phosphoglycerate kinase 1 (PGK1), mRNA.                                                                       | 2.37  |
| PHACTR2  | phosphatase and actin regulator 2 (PHACTR2), mRNA.                                                            | 2.21  |
| PIAS1    | protein inhibitor of activated STAT, 1 (PIAS1), mRNA.                                                         | 2.51  |
| PIAS3    | protein inhibitor of activated STAT, 3 (PIAS3), mRNA.                                                         | 2.40  |
| PIGH     | phosphatidylinositol glycan, class H (PIGH), mRNA.                                                            | 2.95  |
| PIM2     | pim-2 oncogene (PIM2), mRNA.                                                                                  | 5.33  |
| PIP5K2A  | phosphatidylinositol-4-phosphate 5-kinase, type II, alpha (PIP5K2A), mRNA.                                    | 2.97  |
| PLAGL1   | pleiomorphic adenoma gene-like 1 (PLAGL1), transcript variant 4, mRNA.                                        | 3.46  |
| PLAUR    | plasminogen activator, urokinase receptor (PLAUR), transcript variant 1, mRNA.                                | 5.22  |
| PLEKHA9  | pleckstrin homology domain containing, family A (phosphoinositide binding specific) member 9 (PLEKHA9), mRNA. | 3.59  |
| PLEKHQ1  | pleckstrin homology domain containing, family Q member 1 (PLEKHQ1), mRNA.                                     | 6.79  |
| PMM1     | phosphomannomutase 1 (PMM1), mRNA.                                                                            | 2.28  |
| PNPLA8   | patatin-like phospholipase domain containing 8 (PNPLA8), mRNA.                                                | 2.95  |
| POLG     | polymerase (DNA directed), gamma (POLG), mRNA.                                                                | 2.85  |
| POLR2D   | polymerase (RNA) II (DNA directed) polypeptide D (POLR2D), mRNA.                                              | 2.69  |
| POLR2H   | polymerase (RNA) II (DNA directed) polypeptide H (POLR2H), mRNA.                                              | 3.42  |
| POLS     | polymerase (DNA directed) sigma (POLS), mRNA.                                                                 | 2.39  |
| PPM1D    | protein phosphatase 1D magnesium-dependent, delta isoform (PPM1D), mRNA.                                      | 6.78  |
| PPP1R13B | protein phosphatase 1, regulatory (inhibitor) subunit 13B (PPP1R13B), mRNA.                                   | 4.32  |
| PPP1R3C  | protein phosphatase 1, regulatory (inhibitor) subunit 3C (PPP1R3C), mRNA.                                     | 4.84  |
| PPP3CC   | protein phosphatase 3 (formerly 2B), catalytic subunit, gamma isoform (PPP3CC), mRNA.                         | 2.80  |
| PRIC285  | peroxisomal proliferator-activated receptor A interacting complex 285 (PRIC285), transcript variant 2, mRNA.  | 2.77  |
| PRKRIP1  | PRKR interacting protein 1 (IL11 inducible) (PRKRIP1), mRNA.                                                  | 2.41  |
| PRPF38A  | PRP38 pre-mRNA processing factor 38 (yeast) domain containing A (PRPF38A), transcript variant 1, mRNA.        | 2.59  |

|             |                                                                                                                              |      |
|-------------|------------------------------------------------------------------------------------------------------------------------------|------|
| PSPC1       | paraspeckle component 1 (PSPC1), mRNA.                                                                                       | 3.67 |
| PTD015      | chromosome 11 open reading frame 67 (C11orf67), mRNA.                                                                        | 5.47 |
| PTGER4      | prostaglandin E receptor 4 (subtype EP4) (PTGER4), mRNA.                                                                     | 4.89 |
| PTK9        | PREDICTED: PTK9 protein tyrosine kinase 9, transcript variant 3 (PTK9), mRNA.                                                | 6.99 |
| PTTG1       | pituitary tumor-transforming 1 (PTTG1), mRNA.                                                                                | 3.07 |
| PTTG3       | pituitary tumor-transforming 3 (PTTG3) on chromosome 8.                                                                      | 2.88 |
| RAB11FIP1   | RAB11 family interacting protein 1 (class I) (RAB11FIP1), transcript variant 3, mRNA.                                        | 1.34 |
| RAB2        | RAB2A, member RAS oncogene family (RAB2A), mRNA.                                                                             | 2.76 |
| RAB2B       | RAB2B, member RAS oncogene family (RAB2B), mRNA.                                                                             | 2.49 |
| RABGGTB     | Rab geranylgeranyltransferase, beta subunit (RABGGTB), mRNA.                                                                 | 2.32 |
| RABL3       | RAB, member of RAS oncogene family-like 3 (RABL3), mRNA.                                                                     | 2.35 |
| RAET1G      | retinoic acid early transcript 1G (RAET1G), mRNA.                                                                            | 3.71 |
| RALY        | RNA binding protein, autoantigenic (hnRNP-associated with lethal yellow homolog (mouse)) (RALY), transcript variant 1, mRNA. | 3.34 |
| RANBP10     | RAN binding protein 10 (RANBP10), mRNA.                                                                                      | 3.39 |
| RANBP2L1    | RAN binding protein 2-like 1 (RANBP2L1), transcript variant 1, mRNA.                                                         | 6.48 |
| RBBP5       | retinoblastoma binding protein 5 (RBBP5), mRNA.                                                                              | 3.16 |
| RBJ         | rab and DnaJ domain containing (RBJ), mRNA.                                                                                  | 3.08 |
| RBM18       | RNA binding motif protein 18 (RBM18), mRNA.                                                                                  | 2.38 |
| RBM33       | RNA binding motif protein 33 (RBM33), mRNA.                                                                                  | 3.41 |
| RGS2        | regulator of G-protein signalling 2, 24kDa (RGS2), mRNA.                                                                     | 4.80 |
| RIOK2       | RIO kinase 2 (yeast) (RIOK2), mRNA.                                                                                          | 3.65 |
| RIT1        | Ras-like without CAAX 1 (RIT1), mRNA.                                                                                        | 2.85 |
| RKHD3       | mex-3 homolog B (C. elegans) (MEX3B), mRNA.                                                                                  | 9.07 |
| RLF         | rearranged L-myc fusion (RLF), mRNA.                                                                                         | 8.35 |
| RNF113A     | ring finger protein 113A (RNF113A), mRNA.                                                                                    | 2.17 |
| RNF150      | ring finger protein 150 (RNF150), mRNA.                                                                                      | 3.65 |
| RNF24       | ring finger protein 24 (RNF24), mRNA.                                                                                        | 6.15 |
| RP1-112K5.2 | TSR2, 20S rRNA accumulation, homolog (S. cerevisiae) (TSR2), mRNA.                                                           | 2.13 |
| RRAGC       | Ras-related GTP binding C (RRAGC), mRNA.                                                                                     | 2.70 |
| RSRC2       | arginine/serine-rich coiled-coil 2 (RSRC2), transcript variant 1, mRNA.                                                      | 2.53 |
| RYBP        | RING1 and YY1 binding protein (RYBP), mRNA.                                                                                  | 8.04 |
| SAP30       | sin3-associated polypeptide, 30kDa (SAP30), mRNA.                                                                            | 2.48 |
| SAV1        | salvador homolog 1 (Drosophila) (SAV1), mRNA.                                                                                | 3.13 |
| SCNM1       | sodium channel modifier 1 (SCNM1), mRNA.                                                                                     | 2.38 |
| SDC4        | syndecan 4 (SDC4), mRNA.                                                                                                     | 6.51 |

|          |                                                                                                                                                           |       |
|----------|-----------------------------------------------------------------------------------------------------------------------------------------------------------|-------|
| SEC22L2  | SEC22 vesicle trafficking protein-like 2 ( <i>S. cerevisiae</i> ) (SEC22L2), mRNA.                                                                        | 2.46  |
| SELO     | selenoprotein O (SELO), mRNA.                                                                                                                             | 3.99  |
| SERPINB8 | serpin peptidase inhibitor, clade B (ovalbumin), member 8 (SERPINB8), transcript variant 1, mRNA.                                                         | 4.41  |
| SERPINI1 | serpin peptidase inhibitor, clade I (neuroserpin), member 1 (SERPINI1), mRNA.                                                                             | 6.19  |
| SERTAD1  | SERTA domain containing 1 (SERTAD1), mRNA.                                                                                                                | 21.62 |
| SERTAD2  | SERTA domain containing 2 (SERTAD2), mRNA.                                                                                                                | 3.07  |
| SESN1    | sestrin 1 (SESN1), mRNA.                                                                                                                                  | 2.98  |
| SFRS15   | splicing factor, arginine/serine-rich 15 (SFRS15), mRNA.                                                                                                  | 2.80  |
| SH3GLB1  | SH3-domain GRB2-like endophilin B1 (SH3GLB1), mRNA.                                                                                                       | 2.12  |
| SHB      | Src homology 2 domain containing adaptor protein B (SHB), mRNA.                                                                                           | 2.79  |
| SIAH2    | seven in absentia homolog 2 ( <i>Drosophila</i> ) (SIAH2), mRNA.                                                                                          | 2.33  |
| SIPA1L2  | signal-induced proliferation-associated 1 like 2 (SIPA1L2), mRNA.                                                                                         | 2.53  |
| SLC25A19 | solute carrier family 25 (mitochondrial thiamine pyrophosphate carrier), member 19 (SLC25A19), mRNA.                                                      | 5.46  |
| SLC25A36 | solute carrier family 25, member 36 (SLC25A36), mRNA.                                                                                                     | 2.75  |
| SLC25A4  | solute carrier family 25 (mitochondrial carrier; adenine nucleotide translocator), member 4 (SLC25A4), nuclear gene encoding mitochondrial protein, mRNA. | 6.67  |
| SLC2A3   | solute carrier family 2 (facilitated glucose transporter), member 3 (SLC2A3), mRNA.                                                                       | 4.28  |
| SLC30A1  | solute carrier family 30 (zinc transporter), member 1 (SLC30A1), mRNA.                                                                                    | 7.44  |
| SLC30A3  | solute carrier family 30 (zinc transporter), member 3 (SLC30A3), mRNA.                                                                                    | 11.24 |
| SLC41A1  | solute carrier family 41, member 1 (SLC41A1), mRNA.                                                                                                       | 4.22  |
| SLC41A2  | solute carrier family 41, member 2 (SLC41A2), mRNA.                                                                                                       | 2.67  |
| SLC44A2  | solute carrier family 44, member 2 (SLC44A2), mRNA.                                                                                                       | 2.37  |
| SLC6A6   | solute carrier family 6 (neurotransmitter transporter, taurine), member 6 (SLC6A6), mRNA.                                                                 | 2.87  |
| SLC9A3R1 | solute carrier family 9 (sodium/hydrogen exchanger), member 3 regulator 1 (SLC9A3R1), mRNA.                                                               | 6.32  |
| SLU7     | step II splicing factor SLU7 (SLU7), mRNA.                                                                                                                | 4.01  |
| SMAP1L   | stromal membrane-associated protein 1-like (SMAP1L), mRNA.                                                                                                | 2.76  |
| SMARCD2  | SWI/SNF related, matrix associated, actin dependent regulator of chromatin, subfamily d, member 2 (SMARCD2), mRNA.                                        | 3.18  |
| SOX8     | SRY (sex determining region Y)-box 8 (SOX8), mRNA.                                                                                                        | 7.98  |
| SRPK2    | SFRS protein kinase 2 (SRPK2), transcript variant 1, mRNA.                                                                                                | 3.07  |
| SSBP2    | single-stranded DNA binding protein 2 (SSBP2), mRNA.                                                                                                      | 2.57  |
| STC1     | stanniocalcin 1 (STC1), mRNA.                                                                                                                             | 3.85  |
| STK35    | serine/threonine kinase 35 (STK35), mRNA.                                                                                                                 | 3.37  |
| STX3A    | syntaxin 3 (STX3), mRNA.                                                                                                                                  | 2.33  |

|           |                                                                                                              |       |
|-----------|--------------------------------------------------------------------------------------------------------------|-------|
| STX5A     | syntaxin 5A (STX5A), mRNA.                                                                                   | 2.36  |
| STX7      | syntaxin 7 (STX7), mRNA.                                                                                     | 2.57  |
| SUHW1     | suppressor of hairy wing homolog 1 ( <i>Drosophila</i> ) (SUHW1), mRNA.                                      | 9.08  |
| SURB7     | SRB7 suppressor of RNA polymerase B homolog (yeast) (SURB7), mRNA.                                           | 2.55  |
| TAB3      | TAK1-binding protein 3 (TAB3), transcript variant 2, mRNA.                                                   | 2.89  |
| TA-PP2C   | PTC7 protein phosphatase homolog ( <i>S. cerevisiae</i> ) (PPTC7), mRNA.                                     | 3.39  |
| TBPL1     | TBP-like 1 (TBPL1), mRNA.                                                                                    | 5.01  |
| TERF2IP   | telomeric repeat binding factor 2, interacting protein (TERF2IP), mRNA.                                      | 2.35  |
| TFCP2L1   | transcription factor CP2-like 1 (TFCP2L1), mRNA.                                                             | 2.96  |
| THRAP6    | mediator complex subunit 30 (MED30), mRNA.                                                                   | 5.21  |
| TMEFF2    | transmembrane protein with EGF-like and two follistatin-like domains 2 (TMEFF2), mRNA.                       | 5.96  |
| TMEM170   | transmembrane protein 170 (TMEM170), mRNA.                                                                   | 3.03  |
| TMEM38B   | transmembrane protein 38B (TMEM38B), mRNA.                                                                   | 2.37  |
| TMEM41A   | transmembrane protein 41A (TMEM41A), mRNA.                                                                   | 5.31  |
| TMEM47    | transmembrane protein 47 (TMEM47), mRNA.                                                                     | 5.52  |
| TMF1      | TATA element modulatory factor 1 (TMF1), mRNA.                                                               | 2.96  |
| TNFRSF10D | tumor necrosis factor receptor superfamily, member 10d, decoy with truncated death domain (TNFRSF10D), mRNA. | 14.35 |
| TNFSF13B  | tumor necrosis factor (ligand) superfamily, member 13b (TNFSF13B), mRNA.                                     | 5.35  |
| TOLLIP    | toll interacting protein (TOLLIP), mRNA.                                                                     | 2.86  |
| TP53INP1  | tumor protein p53 inducible nuclear protein 1 (TP53INP1), mRNA.                                              | 4.63  |
| TP53INP2  | tumor protein p53 inducible nuclear protein 2 (TP53INP2), mRNA.                                              | 4.15  |
| TPI1      | triosephosphate isomerase 1 (TPI1), mRNA.                                                                    | 2.09  |
| TPST1     | tyrosylprotein sulfotransferase 1 (TPST1), mRNA.                                                             | 3.50  |
| TRIM21    | tripartite motif-containing 21 (TRIM21), mRNA.                                                               | 2.23  |
| TRIM26    | tripartite motif-containing 26 (TRIM26), mRNA.                                                               | 2.23  |
| TRIM28    | tripartite motif-containing 28 (TRIM28), mRNA.                                                               | 2.27  |
| TSC22D2   | TSC22 domain family, member 2 (TSC22D2), mRNA.                                                               | 2.26  |
| TSPAN12   | tetraspanin 12 (TSPAN12), mRNA.                                                                              | 4.82  |
| TSPAN5    | tetraspanin 5 (TSPAN5), mRNA.                                                                                | 2.51  |
| TUBB      | tubulin, beta (TUBB), mRNA.                                                                                  | 1.53  |
| TUBB2A    | tubulin, beta 2A (TUBB2A), mRNA.                                                                             | 13.48 |
| TUBB2C    | tubulin, beta 2C (TUBB2C), mRNA.                                                                             | 3.12  |
| TUBB3     | tubulin, beta 3 (TUBB3), mRNA.                                                                               | 5.15  |
| TUBB4Q    | tubulin, beta polypeptide 4, member Q (TUBB4Q), mRNA.                                                        | 3.24  |
| TUFT1     | tuftelin 1 (TUFT1), mRNA.                                                                                    | 4.35  |
| TYRO3     | TYRO3 protein tyrosine kinase (TYRO3), mRNA.                                                                 | 2.41  |

|         |                                                                                               |       |
|---------|-----------------------------------------------------------------------------------------------|-------|
| UBPH    | similar to ubiquitin binding protein (UBPH), mRNA.                                            | 4.09  |
| UBQLN1  | ubiquilin 1 (UBQLN1), transcript variant 2, mRNA.                                             | 1.61  |
| UGCG    | UDP-glucose ceramide glucosyltransferase (UGCG), mRNA.                                        | 2.55  |
| UPF3B   | UPF3 regulator of nonsense transcripts homolog B (yeast) (UPF3B), transcript variant 1, mRNA. | 3.42  |
| UPK1A   | uroplakin 1A (UPK1A), mRNA.                                                                   | 14.73 |
| USP37   | ubiquitin specific peptidase 37 (USP37), mRNA.                                                | 2.25  |
| VPS37B  | vacuolar protein sorting 37 homolog B ( <i>S. cerevisiae</i> ) (VPS37B), mRNA.                | 4.55  |
| WDR26   | WD repeat domain 26 (WDR26), mRNA.                                                            | 3.52  |
| WDR37   | WD repeat domain 37 (WDR37), mRNA.                                                            | 3.36  |
| WDR47   | WD repeat domain 47 (WDR47), mRNA.                                                            | 8.12  |
| WDR55   | WD repeat domain 55 (WDR55), mRNA.                                                            | 2.32  |
| WDR68   | WD repeat domain 68 (WDR68), transcript variant 1, mRNA.                                      | 1.26  |
| WHDC1   | WAS protein homology region 2 domain containing 1 (WHDC1), mRNA.                              | 4.27  |
| YEATS2  | YEATS domain containing 2 (YEATS2), mRNA.                                                     | 3.49  |
| ZBTB5   | zinc finger and BTB domain containing 5 (ZBTB5), mRNA.                                        | 2.43  |
| ZCSL3   | zinc finger, CSL-type containing 3 (ZCSL3), mRNA.                                             | 2.96  |
| ZFYVE1  | zinc finger, FYVE domain containing 1 (ZFYVE1), transcript variant 1, mRNA.                   | 7.93  |
| ZMYM5   | zinc finger, MYM-type 5 (ZMYM5), mRNA.                                                        | 3.40  |
| ZNF10   | zinc finger protein 10 (ZNF10), mRNA.                                                         | 4.34  |
| ZNF133  | zinc finger protein 133 (ZNF133), mRNA.                                                       | 2.83  |
| ZNF193  | zinc finger protein 193 (ZNF193), mRNA.                                                       | 4.02  |
| ZNF211  | zinc finger protein 211 (ZNF211), transcript variant 1, mRNA.                                 | 3.54  |
| ZNF222  | zinc finger protein 222 (ZNF222), mRNA.                                                       | 3.73  |
| ZNF224  | zinc finger protein 224 (ZNF224), mRNA.                                                       | 4.75  |
| ZNF227  | zinc finger protein 227 (ZNF227), mRNA.                                                       | 3.58  |
| ZNF274  | zinc finger protein 274 (ZNF274), transcript variant ZNF274c, mRNA.                           | 4.26  |
| ZNF297B | zinc finger and BTB domain containing 43 (ZBTB43), mRNA.                                      | 5.17  |
| ZNF30   | zinc finger protein 30 (ZNF30), mRNA.                                                         | 3.62  |
| ZNF317  | zinc finger protein 317 (ZNF317), mRNA.                                                       | 3.05  |
| ZNF342  | zinc finger protein 342 (ZNF342), mRNA.                                                       | 6.30  |
| ZNF383  | zinc finger protein 383 (ZNF383), mRNA.                                                       | 4.84  |
| ZNF430  | zinc finger protein 430 (ZNF430), mRNA.                                                       | 0.78  |
| ZNF484  | zinc finger protein 484 (ZNF484), transcript variant 1, mRNA.                                 | 3.57  |
| ZNF567  | zinc finger protein 567 (ZNF567), mRNA.                                                       | 3.28  |
| ZNF622  | zinc finger protein 622 (ZNF622), mRNA.                                                       | 3.48  |
| ZNF627  | zinc finger protein 627 (ZNF627), mRNA.                                                       | 2.68  |

|        |                                                                |      |
|--------|----------------------------------------------------------------|------|
| ZNF650 | zinc finger protein 650 (ZNF650), mRNA.                        | 3.11 |
| ZNF654 | PREDICTED: zinc finger protein 654 (ZNF654), mRNA.             | 5.97 |
| ZNF669 | zinc finger protein 669 (ZNF669), mRNA.                        | 1.10 |
| ZNF670 | zinc finger protein 670 (ZNF670), mRNA.                        | 6.27 |
| ZNF684 | zinc finger protein 684 (ZNF684), mRNA.                        | 5.26 |
| ZNF721 | zinc finger protein 721 (ZNF721), mRNA.                        | 3.13 |
| ZNF77  | zinc finger protein 77 (ZNF77), mRNA.                          | 3.91 |
| ZRANB1 | zinc finger, RAN-binding domain containing 1 (ZRANB1), mRNA.   | 2.98 |
| ZSWIM5 | PREDICTED: zinc finger, SWIM-type containing 5 (ZSWIM5), mRNA. | 3.63 |
| ZSWIM6 | PREDICTED: zinc finger, SWIM-type containing 6 (ZSWIM6), mRNA. | 2.64 |

### Downregulated Genes

| <b>Gene Symbol</b> | <b>Definition</b>                                                                                    | <b>Fold Change</b> |
|--------------------|------------------------------------------------------------------------------------------------------|--------------------|
| ABLIM3             | actin binding LIM protein family, member 3 (ABLIM3), mRNA.                                           | 4.93               |
| ADAT1              | adenosine deaminase, tRNA-specific 1 (ADAT1), mRNA.                                                  | 6.51               |
| AKNA               | AT-hook transcription factor (AKNA), mRNA.                                                           | 6.28               |
| APBB3              | amyloid beta (A4) precursor protein-binding, family B, member 3 (APBB3), transcript variant 2, mRNA. | 6.93               |
| ARL4C              | ADP-ribosylation factor-like 4C (ARL4C), mRNA.                                                       | 4.96               |
| ASB13              | ankyrin repeat and SOCS box-containing 13 (ASB13), mRNA.                                             | 5.10               |
| ASXL1              | additional sex combs like 1 (Drosophila) (ASXL1), mRNA.                                              | 5.42               |
| ATBF1              | AT-binding transcription factor 1 (ATBF1), mRNA.                                                     | 4.58               |
| C10ORF11           | chromosome 10 open reading frame 11 (C10orf11), mRNA.                                                | 5.34               |
| C11ORF70           | chromosome 11 open reading frame 70 (C11orf70), mRNA.                                                | 4.06               |
| C12ORF32           | chromosome 12 open reading frame 32 (C12orf32), mRNA.                                                | 6.19               |
| C14ORF104          | chromosome 14 open reading frame 104 (C14orf104), mRNA.                                              | 4.95               |
| C14ORF131          | chromosome 14 open reading frame 131 (C14orf131), mRNA.                                              | 9.16               |
| C14ORF4            | chromosome 14 open reading frame 4 (C14orf4), mRNA.                                                  | 18.45              |
| C19ORF7            | chromosome 19 open reading frame 7 (C19orf7), mRNA.                                                  | 5.21               |
| C1ORF106           | chromosome 1 open reading frame 106 (C1orf106), mRNA.                                                | 5.02               |
| C1ORF24            | chromosome 1 open reading frame 24 (C1orf24), transcript variant 2, mRNA.                            | 7.33               |
| C20ORF72           | chromosome 20 open reading frame 72 (C20orf72), mRNA.                                                | 4.97               |
| C2ORF18            | chromosome 2 open reading frame 18 (C2orf18), mRNA.                                                  | 4.62               |
| C3ORF9             | KTEL (Lys-Tyr-Glu-Leu) containing 1 (KTELC1), mRNA.                                                  | 4.36               |
| C6ORF192           | chromosome 6 open reading frame 192 (C6orf192), mRNA.                                                | 5.43               |
| C9ORF103           | chromosome 9 open reading frame 103 (C9orf103), mRNA.                                                | 4.39               |



|          |                                                                                                         |       |
|----------|---------------------------------------------------------------------------------------------------------|-------|
| C9ORF3   | chromosome 9 open reading frame 3 (C9orf3), mRNA.                                                       | 4.44  |
| CBS      | cystathionine-beta-synthase (CBS), mRNA.                                                                | 6.75  |
| CDH4     | cadherin 4, type 1, R-cadherin (retinal) (CDH4), mRNA.                                                  | 7.17  |
| CENTD3   | centaurin, delta 3 (CENTD3), mRNA.                                                                      | 4.26  |
| CHGN     | chondroitin beta1,4 N-acetylgalactosaminyltransferase (ChGn), mRNA.                                     | 6.17  |
| CMKOR1   | chemokine orphan receptor 1 (CMKOR1), mRNA.                                                             | 6.08  |
| CNNM1    | cyclin M1 (CNNM1), mRNA.                                                                                | 4.31  |
| CNO      | cappuccino homolog (mouse) (CNO), mRNA.                                                                 | 6.68  |
| COL7A1   | collagen, type VII, alpha 1 (epidermolysis bullosa, dystrophic, dominant and recessive) (COL7A1), mRNA. | 4.19  |
| CPT2     | carnitine palmitoyltransferase II (CPT2), nuclear gene encoding mitochondrial protein, mRNA.            | 8.87  |
| CTPS     | CTP synthase (CTPS), mRNA.                                                                              | 4.89  |
| CUTC     | cutC copper transporter homolog (E. coli) (CUTC), mRNA.                                                 | 4.49  |
| CXCL2    | chemokine (C-X-C motif) ligand 2 (CXCL2), mRNA.                                                         | 6.61  |
| CYP1B1   | cytochrome P450, family 1, subfamily B, polypeptide 1 (CYP1B1), mRNA.                                   | 18.85 |
| CYP26B1  | cytochrome P450, family 26, subfamily B, polypeptide 1 (CYP26B1), mRNA.                                 | 4.86  |
| CYP4V2   | cytochrome P450, family 4, subfamily V, polypeptide 2 (CYP4V2), mRNA.                                   | 4.47  |
| DARS2    | aspartyl-tRNA synthetase 2 (mitochondrial) (DARS2), mRNA.                                               | 4.44  |
| DKK1     | dickkopf homolog 1 (Xenopus laevis) (DKK1), mRNA.                                                       | 10.17 |
| EDN1     | endothelin 1 (EDN1), mRNA.                                                                              | 4.26  |
| EID3     | EP300 interacting inhibitor of differentiation 3 (EID3), mRNA.                                          | 9.16  |
| EPM2AIP1 | EPM2A (laforin) interacting protein 1 (EPM2AIP1), mRNA.                                                 | 5.33  |
| FADD     | Fas (TNFRSF6)-associated via death domain (FADD), mRNA.                                                 | 7.05  |
| FAM113B  | family with sequence similarity 113, member B (FAM113B), mRNA.                                          | 29.88 |
| FJX1     | four jointed box 1 (Drosophila) (FJX1), mRNA.                                                           | 12.01 |
| FLJ20628 | hypothetical protein FLJ20628 (FLJ20628), mRNA.                                                         | 6.70  |
| FLJ25801 | hypothetical protein FLJ25801 (FLJ25801), mRNA.                                                         | 5.77  |
| FLJ31951 | ring finger protein 145 (RNF145), mRNA.                                                                 | 4.32  |
| FLJ41131 | FLJ41131 protein (FLJ41131), mRNA.                                                                      | 7.87  |
| FOXQ1    | forkhead box Q1 (FOXQ1), mRNA.                                                                          | 9.83  |
| FZD2     | frizzled homolog 2 (Drosophila) (FZD2), mRNA.                                                           | 13.63 |
| GPT2     | glutamic pyruvate transaminase (alanine aminotransferase) 2 (GPT2), mRNA.                               | 4.72  |
| GTF2E1   | general transcription factor IIE, polypeptide 1 (alpha subunit, 56kD) (GTF2E1), mRNA.                   | 5.70  |
| HKDC1    | hexokinase domain containing 1 (HKDC1), mRNA.                                                           | 15.52 |
| HNRPA0   | heterogeneous nuclear ribonucleoprotein A0 (HNRPA0), mRNA.                                              | 4.32  |

|           |                                                                                          |       |
|-----------|------------------------------------------------------------------------------------------|-------|
| HNRPH3    | heterogeneous nuclear ribonucleoprotein H3 (2H9) (HNRPH3), transcript variant 2H9, mRNA. | 10.72 |
| HOXB5     | homeo box B5 (HOXB5), mRNA.                                                              | 4.93  |
| HOXB8     | homeo box B8 (HOXB8), mRNA.                                                              | 7.07  |
| HPS6      | Hermansky-Pudlak syndrome 6 (HPS6), mRNA.                                                | 9.86  |
| HS.143018 | BX105338 Soares_pregnant_uterus_NbHPU cDNA clone IMAGp998C114347, mRNA sequence          | 5.77  |
| HS.193767 | cDNA FLJ26188 fis, clone ADG04821                                                        | 6.04  |
| HS.279842 | HSPC157 protein, mRNA (cDNA clone IMAGE:6672800), partial cds                            | 7.44  |
| HS.355933 | cDNA FLJ41921 fis, clone PERIC2002766                                                    | 10.71 |
| HS.370359 | mRNA; cDNA DKFZp686F09166 (from clone DKFZp686F09166)                                    | 5.84  |
| HS.473191 | cDNA FLJ34428 fis, clone HLUNG2000761                                                    | 6.54  |
| HS.532698 | cDNA FLJ33115 fis, clone TRACH2001314                                                    | 8.52  |
| HS.86045  | cDNA FLJ43676 fis, clone SYNOV4009129                                                    | 6.75  |
| IGF2BP3   | insulin-like growth factor 2 mRNA binding protein 3 (IGF2BP3), mRNA.                     | 4.43  |
| IRS1      | insulin receptor substrate 1 (IRS1), mRNA.                                               | 5.09  |
| KIAA0240  | KIAA0240 (KIAA0240), mRNA.                                                               | 4.74  |
| KIAA0859  | KIAA0859 (KIAA0859), transcript variant 1, mRNA.                                         | 3.54  |
| KIAA1287  | integrator complex subunit 2 (INTS2), mRNA.                                              | 6.22  |
| KIAA1840  | KIAA1840 (KIAA1840), mRNA.                                                               | 4.86  |
| KLHL9     | kelch-like 9 (Drosophila) (KLHL9), mRNA.                                                 | 5.28  |
| LACTB2    | lactamase, beta 2 (LACTB2), mRNA.                                                        | 3.96  |
| LOC116236 | hypothetical protein LOC116236 (LOC116236), mRNA.                                        | 4.50  |
| LOC144233 | BCDIN3 domain containing (BCDIN3D), mRNA.                                                | 10.06 |
| LOC152485 | hypothetical protein LOC152485 (LOC152485), mRNA.                                        | 8.26  |
| LOC283932 | hypothetical protein LOC283932 (LOC283932), mRNA.                                        | 5.46  |
| LOC286334 | PREDICTED: hypothetical protein LOC286334 (LOC286334), mRNA.                             | 4.85  |
| LOC339804 | PREDICTED: hypothetical gene supported by AK075484; BC014578 (LOC339804), mRNA.          | 5.88  |
| LOC389641 | PREDICTED: hypothetical gene supported by AK124295 (LOC389641), mRNA.                    | 4.68  |
| LOC554203 | PREDICTED: hypothetical LOC554203 (LOC554203), misc RNA.                                 | 4.91  |
| LOC653778 | PREDICTED: similar to solute carrier family 25, member 37 (LOC653778), mRNA.             | 5.43  |
| LOC654103 | PREDICTED: similar to solute carrier family 25, member 37 (LOC654103), mRNA.             | 5.18  |
| LYPLAL1   | lysophospholipase-like 1 (LYPLAL1), mRNA.                                                | 4.56  |
| MAP3K8    | mitogen-activated protein kinase kinase kinase 8 (MAP3K8), mRNA.                         | 4.78  |
| MGC14327  | hypothetical protein MGC14327 (MGC14327), mRNA.                                          | 6.13  |
| MGC16385  | hypothetical protein MGC16385 (MGC16385), mRNA.                                          | 7.97  |

|         |                                                                                                  |       |
|---------|--------------------------------------------------------------------------------------------------|-------|
| MGC4562 | DIS3 mitotic control homolog ( <i>S. cerevisiae</i> )-like (DIS3L), mRNA.                        | 6.97  |
| MGC5242 | chromosome 7 open reading frame 49 (C7orf49), mRNA.                                              | 4.13  |
| MRPS16  | mitochondrial ribosomal protein S16 (MRPS16), nuclear gene encoding mitochondrial protein, mRNA. | 5.15  |
| NFIA    | nuclear factor I/A (NFIA), mRNA.                                                                 | 4.93  |
| NFIB    | nuclear factor I/B (NFIB), mRNA.                                                                 | 3.97  |
| NOPE    | neighbor of Punc E11 (NOPE), mRNA.                                                               | 5.23  |
| NPAS2   | neuronal PAS domain protein 2 (NPAS2), mRNA.                                                     | 5.09  |
| NUAK1   | NUAK family, SNF1-like kinase, 1 (NUAK1), mRNA.                                                  | 6.02  |
| NUAK2   | NUAK family, SNF1-like kinase, 2 (NUAK2), mRNA.                                                  | 6.06  |
| OBFC2A  | oligonucleotide/oligosaccharide-binding fold containing 2A (OBFC2A), transcript variant 2, mRNA. | 8.10  |
| PAPPA   | pregnancy-associated plasma protein A, pappalysin 1 (PAPPA), mRNA.                               | 7.30  |
| PDK4    | pyruvate dehydrogenase kinase, isozyme 4 (PDK4), mRNA.                                           | 5.95  |
| PGRMC2  | progesterone receptor membrane component 2 (PGRMC2), mRNA.                                       | 6.67  |
| PHF15   | PHD finger protein 15 (PHF15), mRNA.                                                             | 5.62  |
| PHF23   | PHD finger protein 23 (PHF23), mRNA.                                                             | 5.72  |
| PLAU    | plasminogen activator, urokinase (PLAU), mRNA.                                                   | 5.73  |
| PLK2    | polo-like kinase 2 ( <i>Drosophila</i> ) (PLK2), mRNA.                                           | 4.16  |
| PNMA2   | paraneoplastic antigen MA2 (PNMA2), mRNA.                                                        | 7.02  |
| PRKCH   | protein kinase C, eta (PRKCH), mRNA.                                                             | 6.02  |
| PSPH    | phosphoserine phosphatase (PSPH), mRNA.                                                          | 4.42  |
| PTPN4   | protein tyrosine phosphatase, non-receptor type 4 (megakaryocyte) (PTPN4), mRNA.                 | 5.13  |
| PURB    | purine-rich element binding protein B (PURB), mRNA.                                              | 12.55 |
| RBCK1   | RanBP-type and C3HC4-type zinc finger containing 1 (RBCK1), transcript variant 1, mRNA.          | 3.97  |
| RCC2    | regulator of chromosome condensation 2 (RCC2), mRNA.                                             | 4.00  |
| RIN2    | Ras and Rab interactor 2 (RIN2), mRNA.                                                           | 4.75  |
| ROR1    | receptor tyrosine kinase-like orphan receptor 1 (ROR1), mRNA.                                    | 6.66  |
| RPUSD2  | RNA pseudouridylate synthase domain containing 2 (RPUSD2), mRNA.                                 | 4.33  |
| RRS1    | RRS1 ribosome biogenesis regulator homolog ( <i>S. cerevisiae</i> ) (RRS1), mRNA.                | 4.95  |
| RSPO3   | R-spondin 3 homolog ( <i>Xenopus laevis</i> ) (RSPO3), mRNA.                                     | 5.61  |
| RWDD2   | RWD domain containing 2A (RWDD2A), mRNA.                                                         | 5.35  |
| SC65    | synaptonemal complex protein SC65 (SC65), mRNA.                                                  | 5.61  |
| SEPHS2  | selenophosphate synthetase 2 (SEPHS2), mRNA.                                                     | 7.30  |
| SH3BP4  | SH3-domain binding protein 4 (SH3BP4), mRNA.                                                     | 4.90  |
| SLC33A1 | solute carrier family 33 (acetyl-CoA transporter), member 1 (SLC33A1), mRNA.                     | 7.65  |

|          |                                                                       |       |
|----------|-----------------------------------------------------------------------|-------|
| SLC35B3  | solute carrier family 35, member B3 (SLC35B3), mRNA.                  | 4.62  |
| SLC35C1  | solute carrier family 35, member C1 (SLC35C1), mRNA.                  | 4.58  |
| SNF1LK   | SNF1-like kinase (SNF1LK), mRNA.                                      | 4.49  |
| SNORD36C | small nucleolar RNA, C/D box 36C (SNORD36C) on chromosome 9.          | 6.18  |
| SRGAP1   | SLIT-ROBO Rho GTPase activating protein 1 (SRGAP1), mRNA.             | 4.43  |
| STK36    | serine/threonine kinase 36, fused homolog (Drosophila) (STK36), mRNA. | 6.02  |
| STS-1    | Cbl-interacting protein Sts-1 (STS-1), mRNA.                          | 12.51 |
| TBC1D7   | TBC1 domain family, member 7 (TBC1D7), mRNA.                          | 4.58  |
| TFB1M    | transcription factor B1, mitochondrial (TFB1M), mRNA.                 | 5.02  |
| THNSL1   | threonine synthase-like 1 (bacterial) (THNSL1), mRNA.                 | 5.26  |
| TIGD2    | tigger transposable element derived 2 (TIGD2), mRNA.                  | 10.45 |
| TM2D2    | TM2 domain containing 2 (TM2D2), transcript variant 1, mRNA.          | 6.59  |
| TMEM15   | transmembrane protein 15 (TMEM15), mRNA.                              | 7.93  |
| TNFAIP2  | tumor necrosis factor, alpha-induced protein 2 (TNFAIP2), mRNA.       | 4.26  |
| TNS3     | tensin 3 (TNS3), mRNA.                                                | 7.49  |
| TRIB3    | tribbles homolog 3 (Drosophila) (TRIB3), mRNA.                        | 6.29  |
| TSEN2    | tRNA splicing endonuclease 2 homolog (S. cerevisiae) (TSEN2), mRNA.   | 7.62  |
| TSGA14   | testis specific, 14 (TSGA14), mRNA.                                   | 4.40  |
| TTC25    | tetratricopeptide repeat domain 25 (TTC25), mRNA.                     | 5.68  |
| TTC32    | tetratricopeptide repeat domain 32 (TTC32), mRNA.                     | 4.83  |
| TTF2     | transcription termination factor, RNA polymerase II (TTF2), mRNA.     | 5.23  |
| UBAP2L   | ubiquitin associated protein 2-like (UBAP2L), mRNA.                   | 5.68  |
| WARS     | tryptophanyl-tRNA synthetase (WARS), transcript variant 1, mRNA.      | 4.88  |
| XPC      | xeroderma pigmentosum, complementation group C (XPC), mRNA.           | 4.81  |
| ZBED5    | zinc finger, BED-type containing 5 (ZBED5), mRNA.                     | 4.26  |
| ZFP36L1  | zinc finger protein 36, C3H type-like 1 (ZFP36L1), mRNA.              | 5.80  |
| ZHX2     | zinc fingers and homeoboxes 2 (ZHX2), mRNA.                           | 7.34  |
| ZNF161   | vascular endothelial zinc finger 1 (VEZF1), mRNA.                     | 4.04  |
| ZNF558   | zinc finger protein 558 (ZNF558), mRNA.                               | 4.50  |

## Supplementary Table 2

Summary of all networks found to be significant by IPA analysis in DAMTC treated A549 cells (the genes highlighted in bold are structural constituents of cytoskeleton regulated by Rho-GTPases)

| ID | Molecules in Network                                                                                                                                                                                                                                                                                                                             | Score | Focus Molecules | Top Functions                                                                                                          |
|----|--------------------------------------------------------------------------------------------------------------------------------------------------------------------------------------------------------------------------------------------------------------------------------------------------------------------------------------------------|-------|-----------------|------------------------------------------------------------------------------------------------------------------------|
| 1  | Adaptor protein 1, ARID4A, C2ORF18, CUTC (includes EG:51076), EAF1, EIF4A3 (includes EG:9775), ELL2, FAM46A, GCH1, GGA2, GTF2B, GTF2E1, HNRNPH3, MICA, NfκB (complex), NUAKE2, NXF1, OAT, PELI1, PIM2 (includes EG:11040), PLK2, RBCK1, RLF, RNF19B, SAP30, SLC25A4, TBPL1, TFIIE, TFIIF, Tnf receptor, TNFAIP2, TNFSF13B, TOLLIP, UPF3B, ZNF274 | 47    | 30              | RNA Damage and Repair, Gene Expression, Cell Cycle                                                                     |
| 2  | ALP, BMP2, BMP6, BNIP3 (includes EG:664), CYCS (includes EG:54205), CYP1B1, FJX1, FOSL1, Frizzled, FZD1, FZD2, FZD7, HBEGF, hCG, Hexokinase, <b>HK2</b> , HKDC1, MBIP, NDEL1, P38 MAPK, Pkc(s), PLAU, PLAUR, Plc beta, PPM1D, RGS2, SERTAD1, SERTAD2, STC1, STX3, TNFRSF10D, TRIM28, UBQLN1, ZNF10, ZNF211                                       | 43    | 28              | Cell Morphology, Skeletal and Muscular System Development and Function, Cardiovascular System Development and Function |
| 3  | 9130409I23RIK, ABHD5, AHR, CBR3, CDC34 (includes EG:997), Ck2, CLDND1, CYB5RL, CYP4EA, DKK1, EIF1B, ERO1L, HELZ, <b>KATNA1</b> , MED19, MED21, MED30, MIR124, MSSE, NDRG1, NFIA, NFIB, Nuclear factor 1, Oxidoreductase, PGRMC2, PIP4K2A, Pka, PMM1, POLR2D, POLR2H, RNA polymerase II, SHB, Trypsin, WARS, ZCCHC24                              | 34    | 24              | Gene Expression, Cancer, Gastrointestinal Disease                                                                      |
| 4  | ADM, Alcohol group acceptor phosphotransferase, ATYPICAL PROTEIN KINASE C, CDK7, CTH, EDN1, ERK, ERFFI1, FER (includes EG:2241), GYS1,                                                                                                                                                                                                           | 32    | 24              | Cell Cycle, Hematological Disease, Metabolic                                                                           |

|   |                                                                                                                                                                                                                                                                                                                                                                                                              |    |    |                                                                       |
|---|--------------------------------------------------------------------------------------------------------------------------------------------------------------------------------------------------------------------------------------------------------------------------------------------------------------------------------------------------------------------------------------------------------------|----|----|-----------------------------------------------------------------------|
|   | IRS1, IRS2, JAK, <b>KLHL21</b> , LIFR, MAP2K1, MAP3K8, Mek, NRAS, p70 S6k, Pdgf, PDGF BB, PP2A, PRKCH, PSPH, PTGER4, RAB2A, RIN2, RIT1, RRS1, Shc, Sos, TMF1, TRIB3, VEZF1                                                                                                                                                                                                                                   |    |    | Disease                                                               |
| 5 | Akt, AMPK, BAG3, Calcineurin protein(s), Calmodulin, CBS (includes EG:875), CDC37L1, CDK5R1, CTSL2, Cytochrome c, DNAJA1, DNAJB1, DNAJC5, DUSP14, FAM162A, GABARAPL1, GNAQ, HMGCR, Hsp70, Hsp90, Hsp22/Hsp40/Hsp90, INSIG1, Nos, PFKFB3, PPP3CC, Proteasome, PTTG1, <b>SH3GLB1</b> , TERF2IP, <b>TUBB</b> , <b>TUBB3</b> , <b>TUBB2C</b> , Tubulin, TYRO3, Ubiquitin                                         | 30 | 23 | Cancer, Gastrointestinal Disease, Lipid Metabolism                    |
| 6 | ATF2, ATF7IP2, BCL10, CD83, CRABP2, Creb, <b>CSRP2</b> , CXCL2, Cyclin A, Cyclin E, DUSP8, E2f, EGLN1, GADD45A, Hdac, HDAC3, HISTONE, Histone h3, Histone h4, Jnk, MBD1, MXD1, N-cor, P4HA1, PEG10, PGK1, PIAS1, PIAS3, PLAGL1, Rb, SIAH2, Smad, TRIM21, VitaminD3-VDR-RXR, ZFHX3                                                                                                                            | 28 | 22 | Cell Cycle, Connective Tissue Development and Function, Cancer        |
| 7 | Actin, Alpha Actinin, Alpha catenin, CDH4 (includes EG:1002), CTPS, EFHD1, FOXD1, GRPEL1, GUK1, HLA-A, HLA-B, HLA-E, HSPA4L, IFN Beta, IgG, IL12 (complex), Interferon alpha, ISG20, ISG15 (includes EG:9636), MARCKSL1, MHC Class I (complex), MHC CLASS I (family), MHC I- $\alpha$ ;, NCALD, Nfat (family), NP (includes EG:4860), PCSK5, PI3K, Ptk, RCC2, <b>SDC4</b> , STAT, <b>TUBB2A</b> , TWF1, UGCG | 24 | 21 | Cell Signaling, Nucleic Acid Metabolism, Small Molecule Biochemistry  |
| 8 | ADCY, ADIPOR2, Ap1, ARL4C, Collagen(s), CRYM, CTR9, Dynamin, EFNB2, EIF4EBP2, ERK1/2, FRAT2, FSH, GEM, Glycogen synthase, GNAI2, IL1, IL1A, Insulin, LDL, LPIN1, Mapk, <b>MAPRE2</b> , Mmp, OSBPL6, PAG1, PLC, PPP1R3C, Ras, Sapk, SH3BP4, SLC2A3, SLC9A3R1, Tgf beta, Vegf                                                                                                                                  | 22 | 18 | Cell Morphology, Connective Tissue Disorders, Carbohydrate Metabolism |
| 9 | ADAT1, ANKZF1, C16ORF80, C20ORF72, C20ORF111, CAB31, E2F4, EPM2AIP1, FAM103A1, FURIN, HNF4A, HPS6, HPS5 (includes EG:11234), LRRC8C, ONECUT1, PLSCR1, POLRMT, RABAC1, retinoic acid, SERPINB8, SLC25A19, SREBF1, TFB1M,                                                                                                                                                                                      | 19 | 16 | Gene Expression, Cancer, Cell Cycle                                   |

|    |                                                                                                                                                                                                                                                                                                                                                         |    |    |                                                                                     |
|----|---------------------------------------------------------------------------------------------------------------------------------------------------------------------------------------------------------------------------------------------------------------------------------------------------------------------------------------------------------|----|----|-------------------------------------------------------------------------------------|
|    | TP53, TUFT1, ZNF133, ZNF224                                                                                                                                                                                                                                                                                                                             |    |    |                                                                                     |
| 10 | C12ORF34, C16ORF70, C18ORF8, CALB1, CHRAC1, DNA-directed DNA polymerase, FAM100B, FAM91A1, GNPDA2, IMPA1, KIAA0240, <b>KLHL18</b> , MIR93, MIR1-1 (includes EG:406904), MIR106B (includes EG:406900), MIR199A1, MIR20A, MIRLET7E, MYLIP, PAPD5, POFUT1, POLE4, POLG, POLG2, POLK, POLM, POLN, POLQ, POLS, RGS17, RHBDF1, RIMKLB, TP53INP2, WDR47, WDR55 | 19 | 16 | Nucleic Acid Metabolism, Small Molecule Biochemistry, Genetic Disorder              |
| 11 | ABTB2, ALB, AMPD3 (includes EG:272), BIN3, BTG3, CCNG2, CCRN4L, CDKN2A, CFH, COX3, CPA4, CPT2, CYP26B1, CYTB, DEK, FAM113B, FCGRT, <b>FNBP1</b> , GPD2, HNRNPA0, Integrin alpha 6 beta 1, JARID2, KRT6A, MYO9B, NKX3-1, NUA1, PEX11A, PNPLA8, RHOV, SLC01A1, SYNPO, testosterone, TNF, TPST1, ZFP36L1                                                   | 17 | 15 | Gene Expression, Cancer, Cell-To-Cell Signaling and Interaction                     |
| 12 | AATK, APPBP2, AXUD1, BNIP3L, C11ORF70, C8ORF41, CGGBP1, CHIC2, CSRNP2, EID3, FAF1, FMR1, GTF3C5, HMGB2, KIAA0907, L-carnitine, MIR362, MIR92A1, MIR92A2, NR3C1, OAT, ONECUT1, PELP1, PTP4A2, RABGGTB, RPS6KA5, RRAGC, SRPK1, TAT (includes EG:6898), THAP1, TM2D2, U2AF2 (includes EG:11338), WDR12, WDR26, ZNF317                                      | 17 | 15 | Genetic Disorder, Metabolic Disease, Connective Tissue Disorders                    |
| 13 | ADPRHL2, amino acids, ATP5F1, ATP5I, ATP6V0D1, BPNT1, BRSK1, C9ORF80, CAMK1G, CDKL1, CNKSR3, CREB1, DNAJC27, IKBKE, ILK, ILKAP, KCTD5, KIAA0999, LHFPL2, METTL11A, Mg <sup>2+</sup> , MIR183 (includes EG:406959), NCBP2, PDK4, PDXK, PGGT1B, PITPNB, SIK1, SRPK2, STK11, STK36, TIPARP, TSPAN12, TSSK4, ZC3H4                                          | 17 | 15 | Amino Acid Metabolism, Post-Translational Modification, Small Molecule Biochemistry |
| 14 | BRP44L, CCNYL1, CLCN4, CLDN11, CLDN12, CNNM4, CTTNBP2NL, CXORF26, DOCK4, FAM125A, FAM40A, FBXO33, FGFR1OP2, KCNS3, KHDRBS3, MEX3C, MIR15B (includes EG:406949), MIR24-1, MIR34A, MIRLET7B, NRIP3, PDCD10, RANBP10, ROCK1, RP5-1000E10.4, RP6-213H19.1, SLC35C1, STK25, STRN, STRN4,                                                                     | 17 | 15 | Genetic Disorder, Immunological Disease, Post-Translational Modification            |

|    |                                                                                                                                                                                                                                                                                                        |    |    |                                                                                                  |
|----|--------------------------------------------------------------------------------------------------------------------------------------------------------------------------------------------------------------------------------------------------------------------------------------------------------|----|----|--------------------------------------------------------------------------------------------------|
|    | TRAF3IP3, UBR3, VPS37B, ZMYM3<br>(includes EG:9203), ZNF654                                                                                                                                                                                                                                            |    |    |                                                                                                  |
| 15 | AEBP2, ASXL1, ASXL2, ASXL3, ATP, C1ORF106, CHCHD7, CXCR7, CYSLTR1, EED, EZH2, FGF17, IL13, KLHDC2, MICB, MIR25, MYT1, NAPG, NSF, P2RX1, P2RY4, PAX3, PCGF1, PDK3, POU2F3, PRAME (includes EG:23532), RAD51C, SAV1, SFN, SLC41A1 (includes EG:254428), SUZ12, TNS3, TSGA14, WDR37, WDR68                | 17 | 15 | Cardiovascular System Development and Function, Post-Translational Modification, Cell Morphology |
| 16 | ABHD6, AGTPBP1, AHCYL1, APEH, C12ORF24, <b>DCTN5</b> , EXOSC2, EXOSC5, FAM53C, HNF4A, KLHL28, LAS1L, LSM5, MIPEP, NLN, NOLC1, NRD1, PKM2, PLEKHA9, PNKP, POLB, RBM18, REXO2, RIOK2, RNF113A, SLC33A1, SPCS3, SUPT16H, TRIM26, TTC25, VPS29, XRCC4, ZNF193, ZNF222, ZNF558                              | 15 | 14 | DNA Replication, Recombination, and Repair, Gene Expression, RNA Damage and Repair               |
| 17 | ANGPTL4, ARNTL, C9ORF3, CCDC28A, CCDC85B, CITED2, CKS2, CLOCK, CRY1, CRY2, CSNK1E, DARC, HIC2, HOXB5, KRT17, LHX2, MIR153-1, MIR153-2, MIRN135B, NPAS2, NRG, PBX1, PCGF2, PDK2, PER1, PER2, PHF15, PKN1, PRC1, PSMC1, ROR1, SLU7, TGFB1, ZBTB5, ZHX2                                                   | 15 | 14 | Behavior, Nervous System Development and Function, Gene Expression                               |
| 18 | AK1, AK3L2 (includes EG:645619), C12ORF5, CTSW, DARS2, DGKA (includes EG:1606), EEF1E1, GART, GLCE, GOSR2, IL2, JMJD1C, KNTC1, LATS2, MCM6, MRPS16, MYBL2, NOC2L, NOX4, PDRG1, POLE2, RALY, RFFL, SCNM1, SEC22A, SESN1, SLC6A6, STX5, TP53, TP53RK (includes EG:112858), Ube3, UPP1, VHL, YKT6, ZNF622 | 14 | 14 | Cell Cycle, Cellular Assembly and Organization, Cellular Function and Maintenance                |
| 19 | BATF, BCL11B, BPGM, CAMK2B, CEBPA, CLP1, ENO2, ENO3, Enolase, HBD, HTT, LIPT1, LOC100129193, MIR26B, NFIL3, OSBPL8, OSTF1, P glycerolmutase, PCTP, PGAM1, PGAM2, PGAM4, PURB (includes EG:5814), SERPINI1, SRGAP1, SRGAP2, SRGAP3, ST3GAL2, SYMPK, TFCP2L1, TPI1, TSEN2, TSEN15, ZIC3                  | 14 | 13 | Genetic Disorder, Neurological Disease, Skeletal and Muscular Disorders                          |
| 20 | ATAD2, beta-estradiol, C12ORF32, C14ORF4, CALM2, CRADD, E2F1, FGF9, FGFR3, GJB2,                                                                                                                                                                                                                       | 14 | 13 | Infection Mechanism,                                                                             |



|    |                                                                                                                                                                                                                                                                                                                                                        |    |    |                                                                                      |
|----|--------------------------------------------------------------------------------------------------------------------------------------------------------------------------------------------------------------------------------------------------------------------------------------------------------------------------------------------------------|----|----|--------------------------------------------------------------------------------------|
|    | GMFB, GPX3, GSTT1, H19, HIST2H2AA3, HN1, IRX5, LDB3, MIR16-1, NARF, PHF23, PKIB, POLA1, POLA2, POLE2, PRDM2, PRIM1, PRIM2, PRPF38A, PRSS23, PTPN4, SLC30A3, SSBP2, TRHDE, TSPAN5                                                                                                                                                                       |    |    | Gene Expression, DNA Replication, Recombination, and Repair                          |
| 21 | C19ORF10, CD99 (includes EG:4267), COL8A1, COQ10B, COX6C, CYB5R1, CYP4F2, DCXR, FZD7, GARS, HAS1, HNF1A, HNRPDL, JMJD1A, KIAA1219, PDIA5, PHACTR2, PNO1, PTN, RHPN2, RSRC2, RUNX2, SET, SLC25A36, SNX3, SOX8, SRC, TARS, TBCA, TRAF6, TSC22D2, UBAP2L, UBQLN4, VCL, ZRANB1                                                                             | 14 | 13 | Cell Morphology, Cellular Development, Connective Tissue Development and Function    |
| 22 | ASB13, C1ORF63, C3ORF38, CAMSAP1L1, CLK2, CLK3, DCP1A, DPM2, EDC3, EDC4, ELOVL6, FAM126B, GCA, HOXB8, KIAA0247, MIRN101B, PFKFB2, Phosphatidylinositol N-acetylglucosaminyltransferase, PIGA, PIGB, PIGC, PIGH, PIGP, PIGQ, PIGY (includes EG:84992), PPIG, RAB11FIP1, RAB11FIP2, SMCR7L, TTF2, USP46, USP37 (includes EG:57695), YWHAG, ZBTB34, ZFP36 | 14 | 13 | Lipid Metabolism, Nucleic Acid Metabolism, Small Molecule Biochemistry               |
| 23 | ARID3B, CDK4/6, CKB, CUL1, DDX11, dihydrotestosterone, ECM1, ETV3, FAM129A, FBXL12, FBXL20, FBXO2, FBXW8, FOXQ1, GAPDH (includes EG:14433), Gm-Csf Receptor, GTF3C2, HCFC2, KLK1, METTL13, MFAP1, MLF1, MYC, PPT1, RB1, RBBP5, RIMKLA, RPL27, RPS23, SEPHS2, SLC25A1, STAT5A, UBR2, ZAK, ZNF567                                                        | 14 | 13 | Hematological System Development and Function, Hematopoiesis, Organismal Development |
| 24 | ASRGL1, ATP5D, ATP5G1, ATP5H (includes EG:641434), ATP5I, ATP6AP1, ATP6V1B2, ATP6V1D, ATP6V1F, BLOC1S2, BNIP1, C3ORF58, CNN3, CNO, CTSA, DYNC1LI2, EHD4, EPS15L1, FBXO6, GCAT, GPT2, ITGB1, KIAA1467, LNX2, MIR23B, NEU1, NUMB, PLOD1, PTEN, RAB2B, SEC22B, SLC25A1, SLC2A4, SNAPIN, STX7                                                              | 13 | 13 | Energy Production, Nucleic Acid Metabolism, Small Molecule Biochemistry              |
| 25 | AEN, AFF4, AKNA, ALDOC, BANP, BRP2, CD40, Cofilin, EIF2AK2, HIF1A, hydrogen peroxide, IKK (complex), IL4I1, MAP3K6, MAP3K5 (includes EG:293015), MTF1,                                                                                                                                                                                                 | 12 | 13 | Cell Death, Hematological Disease, Immunologica                                      |

|    |                                                                                                                                                                                                                                                                                                                                                    |    |    |                                                                                                               |
|----|----------------------------------------------------------------------------------------------------------------------------------------------------------------------------------------------------------------------------------------------------------------------------------------------------------------------------------------------------|----|----|---------------------------------------------------------------------------------------------------------------|
|    | NFKBIE, NIK, PDXP (includes EG:57026), PFKFB4, PRKRIP1, REL/RELA/RELB, RNF219, SESN1, SLC30A1, SLC39A7, TCEB3B, TIFA, TRAF2, TRAF3IP2, TTRAP, UACA, Ube3, UBE2V1, ZBTB43                                                                                                                                                                           |    |    | I Disease                                                                                                     |
| 26 | ADAMTS14, ASTL, CASP3, CDKN1A, CPA5, CTRL, DPEP3, ERBB4, GPN3, IGF2, IGF2BP3, IMMP2L, KITLG, MIRN351, MMP1B, NAALADL1, PAPP, PEPC (includes EG:109616), peptidase, phosphatidylinositol 3,4-diphosphate, PRT5, PRT6, PSPC1, RNF150, SENP17, SENP5 (includes EG:303874), SLC44A2, SMARCD2, TMEFF2, TMPRSS11D, TP53INP1, UPG2, ZBED5, ZFYVE1, ZSWIM5 | 12 | 12 | Protein Degradation, Cellular Growth and Proliferation, Skeletal and Muscular System Development and Function |
| 27 | ARIH1, BCL2L10, BCL2L11, C10ORF35, CAMLG, CARD8, CASP8AP2, Caspase, CDCA2, CEBPZ, DEDD, ERCC5, FADD (includes EG:8772), FDXR, FOXL2, HAGH, Igm, JAG2, KCNQ1, MAFF, MFAP3, P53AIP1, PPP1CA, PPP1R13B, RSPO3, RYBP, SFRS15, TP63, TP73, TP53BP2, TP53I3, UBE2D1, UBE2E2, UBE2H (includes EG:7328), XPC                                               | 12 | 12 | Cancer, Cell Death, Cell Morphology                                                                           |
| 28 | <b>ABLIM3</b> , APBB3, C21ORF91, CHMP4A, CHMP4B, CHMP4C, CLNK, COL7A1, COX6A1, DOLK, EGFR, Egfr dimer, Egfr-ErbB2, FKBP15, GRB2, IFNB1, KLHL9, LINGO1, MIR185 (includes EG:406961), PNMA2, RAE1, RNF24, RPL18, RPL27, RPL27A (includes EG:6157), RPS28, RPUSD2, SHKBP1, SLC25A3, SMAD3, STAMBP, TBXAS1, TPSAB1, USP6NL, VPS24                      | 11 | 11 | Cellular Movement, Lipid Metabolism, Small Molecule Biochemistry                                              |
| 29 | ARAP3, ARF6, CITED2, CPEB3, FMR1, HECA, MEX3B, MIR206, MIR301A, MIR320A, MIRN291B, NARG1, NAT12, NFIB, NFYB, NKX6-1, NMT1, PCNA, PHOX2B, PLK1, PPPDE1, RWDD2A, SCARB1, TP53, UBE2D3, UBP1, ZNF484, ZNF609                                                                                                                                          | 10 | 10 | Cancer, Cell Cycle, Embryonic Development                                                                     |
| 30 | CAPN8, TIGD2 (includes EG:166815)                                                                                                                                                                                                                                                                                                                  | 1  | 1  |                                                                                                               |
| 31 | INTS2, POLR2C                                                                                                                                                                                                                                                                                                                                      | 1  | 1  | RNA Post-Transcriptional Modification, Skeletal and                                                           |

|    |                                  |   |   |                                                                                         |
|----|----------------------------------|---|---|-----------------------------------------------------------------------------------------|
|    |                                  |   |   | Muscular System Development and Function, Tissue Development                            |
| 32 | CRLF3 (includes EG:51379), WASF2 | 1 | 1 | Cell Morphology, Cellular Assembly and Organization, Cancer                             |
| 33 | C1ORF128, CDC73                  | 1 | 1 | Endocrine System Disorders, Genetic Disorder, Cancer                                    |
| 34 | KIAA1279, ZNF670                 | 1 | 1 | Molecular Transport                                                                     |
| 35 | UPK2, UPK1A                      | 1 | 1 | Cell Morphology, Renal and Urological System Development and Function, Genetic Disorder |
| 36 | GLTP, MIR373                     | 1 | 1 | Lipid Metabolism, Molecular Transport, Small Molecule Biochemistry                      |
| 37 | HPS1, HPS4                       | 1 | 1 | Genetic Disorder, Cellular Assembly and Organization, Cellular Development              |
| 38 | PDLIM1, STK35                    | 1 | 1 | Cellular Assembly and                                                                   |

|    |                      |   |   |                                                                              |
|----|----------------------|---|---|------------------------------------------------------------------------------|
|    |                      |   |   | Organization, Cellular Function and Maintenance, Cancer                      |
| 39 | CYP4V, CYP4V2        | 1 | 1 | Ophthalmic Disease                                                           |
| 40 | RBM33, SUMO3, ZNF143 | 1 | 1 | Gene Expression, Post-Translational Modification, Endocrine System Disorders |

### Supplementary Table 3

#### Human specific primer sequences used for Real Time PCR

| Gene     | Primer | Sequence                | Amplicon size (bp) |
|----------|--------|-------------------------|--------------------|
| TOLLIP   | FP     | GCCAAGAATTACGGCATGACC   | 124                |
|          | RP     | GTGGATGACCTTATCCAGCG    |                    |
| ZNF274   | FP     | GATCCAGGCCCTATATGCTGA   | 148                |
|          | RP     | CGGGGACCTGTCATGTCCTTA   |                    |
| TNFSF13B | FP     | GGGAGCAGTCACGCCTTAC     | 80                 |
|          | RP     | CGTGGGAGGATGGAAACACAC   |                    |
| FOSL1    | FP     | ATCTGCAAAATCCCGGAAGG    | 134                |
|          | RP     | AGTGCCTCAGGTTCAAGCACAG  |                    |
| GADD45A  | FP     | TCAGCGCACGATCACTGTC     | 83                 |
|          | RP     | CCAGCAGGCACAACACCAC     |                    |
| EDN1     | FP     | CAGCAGTCTTAGGCGCTGAG    | 127                |
|          | RP     | ACTCTTTATCCATCAGGGACGAG |                    |

|                |    |                          |     |
|----------------|----|--------------------------|-----|
| CDK7           | FP | ATGGCTCTGGACGTGAAGTC     | 123 |
|                | RP | CTTAATGGCGACAATTTGGTTG   |     |
| RBCK1          | FP | GGGATGAACAGGTGGCAAT      | 77  |
|                | RP | GCTTCAGTTGCACACTCAGG     |     |
| NUAK2          | FP | GATGCACATACGGAGGGAGAT    | 119 |
|                | RP | GCTGGCATACTCCATGACGAT    |     |
| PLK2           | FP | CTCAGCAACCCAGCAAACAC     | 118 |
|                | RP | TCCGAATAGCATCCCCAATCT    |     |
| MAP3K8         | FP | ATGGAGTACATGAGCACTGGA    | 117 |
|                | RP | TGGCTCTTCACTTGATAAAGAT   |     |
| TRIB3          | FP | AAGCGGTTGGAGTTGGATGAC    | 128 |
|                | RP | CACGATCTGGAGCAGTAGGT     |     |
| BCL2L11        | FP | ATGGCAAAGCAACCTTCTGAT    | 118 |
|                | RP | GCTCTGTCTGTAGGGAGGTAGG   |     |
| BNIP3          | FP | CAGGGCTCCTGGGTAGAACT     | 129 |
|                | RP | CTCCGTCCAGACTCATGCTG     |     |
| BCL10          | FP | CTTGTTGAATCTATTTCGGCGAGA | 136 |
|                | RP | TGGAAAAGGTTCACAACTGCT    |     |
| 18S            | FP | GTAACCCGTTGAACCCCAT      | 153 |
|                | RP | CCATCCAATCGGTAGTAGCG     |     |
| RhoGDI alpha   | FP | GGATGAGCACTCGGTCAACTA    | 103 |
|                | RP | GGCCTCCTTGTACTTTCGCAG    |     |
| RS/DJ-1        | FP | AACCGGAAGGGCCTGATAG      | 161 |
|                | RP | CCGTCTTTTCCACACGATTCT    |     |
| 14-3-3 epsilon | FP | CTGAGCGATACGACGAAATGG    | 147 |
|                | RP | TGCTGCTGATTATTCTCCAGGA   |     |

#### Supplementary Table 4

**Experimental design for the labeling of control and DAMTC treated A549 lysate in 2D DIGE**

| <b>Gel Number</b> | <b>Cy2 standard</b> | <b>Cy3</b> | <b>Cy5</b> |
|-------------------|---------------------|------------|------------|
| Gel 1             | Pooled Sample       | Control 1  | Treated 3  |
| Gel 2             | Pooled Sample       | Treated 1  | Control 3  |
| Gel 3             | Pooled Sample       | Control 2  | Treated 4  |
| Gel 4             | Pooled Sample       | Treated 2  | Control 4  |

#### Supplementary Table 5

**Database search results of spectra acquired on MALDI-TOF/TOF (ABSCIEX TOF/TOF 5800, Applied Biosystems) mass spectrometer. The MS data were acquired in window of m/z 700 to m/z 4000. The mass spectrometer spectra were analyzed using Protein Pilot software (version 3.0) with Mascot search engine (MASCOT V2.2) in Human SWISS-PROT databases (release version 51.6 containing 257964 sequences, 93947433 residues). Maximum number of missed cleavages was set to 1. The search parameters allowed oxidation of methionine as variable modification, carboxyamidomethylation of cysteine as fixed modification. Precursor mass tolerance was set at 100 ppm and MS/MS fragment mass tolerance was set at 0.4Da. Mowse score that signifies p value < 0.05 was considered significant for successful protein identification.**

| S. No. | Protein Name | Accession number | Expect.  | % seq. coverage | Measured mass (M+H) | Score | Peptide Sequence       | Modification                           |
|--------|--------------|------------------|----------|-----------------|---------------------|-------|------------------------|----------------------------------------|
| 1      | 14-3-3E      | P62258           | 3.10E-78 | 58              | 816.46              | 817   | K.LAEQAER.Y            |                                        |
|        |              |                  |          |                 | 816.46              |       | K.LAEQAER.Y            |                                        |
|        |              |                  |          |                 | 1575.9              |       | K.KVAGMDVELT<br>VEER.N |                                        |
|        |              |                  |          |                 | 1575.9              |       | K.KVAGMDVELT<br>VEER.N |                                        |
|        |              |                  |          |                 | 1447.8              |       | K.VAGMDVELTV<br>EER.N  |                                        |
|        |              |                  |          |                 | 1447.8              |       | K.VAGMDVELTV<br>EER.N  |                                        |
|        |              |                  |          |                 | 1463.8              |       | K.VAGMDVELTV<br>EER.N  | Oxidation (M)                          |
|        |              |                  |          |                 | 1463.8              |       | K.VAGMDVELTV<br>EER.N  | Oxidation (M)                          |
|        |              |                  |          |                 | 917.58              |       | R.IISSIEQK.E           |                                        |
|        |              |                  |          |                 | 917.58              |       | R.IISSIEQK.E           |                                        |
|        |              |                  |          |                 | 1476.8              |       | K.LICCDILDVLD<br>K.H   | <sup>2</sup><br>Carbamidomethyl<br>(C) |
|        |              |                  |          |                 | 1476.8              |       | K.LICCDILDVLD<br>K.H   | <sup>2</sup><br>Carbamidomethyl<br>(C) |
|        |              |                  |          |                 | 1237.7              |       | K.HLIPAANTGES<br>K.V   |                                        |
|        |              |                  |          |                 | 1237.7              |       | K.HLIPAANTGES<br>K.V   |                                        |
|        |              |                  |          |                 | 719.41              |       | K.VFYK.M               |                                        |
|        |              |                  |          |                 | 906.48              |       | K.MKGDYHR.Y            |                                        |
|        |              |                  |          |                 | 922.47              |       | K.MKGDYHR.Y            | Oxidation (M)                          |
|        |              |                  |          |                 | 922.47              |       | K.MKGDYHR.Y            | Oxidation (M)                          |
|        |              |                  |          |                 | 1256.7              |       | R.YLAEFATGND<br>R.K    |                                        |

|   |      |        |           |    |        |      |                              |                      |
|---|------|--------|-----------|----|--------|------|------------------------------|----------------------|
|   |      |        |           |    | 1256.7 |      | R.YLAEFATGND<br>R.K          |                      |
|   |      |        |           |    | 1384.8 |      | R.YLAEFATGND<br>RK.E         |                      |
|   |      |        |           |    | 1384.8 |      | R.YLAEFATGND<br>RK.E         |                      |
|   |      |        |           |    | 1385.8 |      | R.YLAEFATGND<br>RK.E         | Deamidated (NQ)      |
|   |      |        |           |    | 1820.1 |      | K.AASDIAMTELP<br>PTHPIR.L    |                      |
|   |      |        |           |    | 1820.1 |      | K.AASDIAMTELP<br>PTHPIR.L    |                      |
|   |      |        |           |    | 1836   |      | K.AASDIAMTELP<br>PTHPIR.L    | Oxidation (M)        |
|   |      |        |           |    | 1836   |      | K.AASDIAMTELP<br>PTHPIR.L    | Oxidation (M)        |
|   |      |        |           |    | 719.41 |      | R.ACRLAK.A                   | Carboxymethyl<br>(C) |
|   |      |        |           |    | 2088.1 |      | K.AAFDDAIAELD<br>TLSEESYK.D  |                      |
|   |      |        |           |    | 2088.1 |      | K.AAFDDAIAELD<br>TLSEESYK.D  |                      |
|   |      |        |           |    | 1189.7 |      | K.DSTLIMQLLR.D               |                      |
|   |      |        |           |    | 1189.7 |      | K.DSTLIMQLLR.D               |                      |
|   |      |        |           |    | 1205.7 |      | K.DSTLIMQLLR.D               | Oxidation (M)        |
|   |      |        |           |    | 1205.7 |      | K.DSTLIMQLLR.D               | Oxidation (M)        |
|   |      |        |           |    | 2181.1 |      | R.DNLTLWTSDM<br>QGDGEEQNK.E  |                      |
|   |      |        |           |    | 2181.1 |      | R.DNLTLWTSDM<br>QGDGEEQNK.E  |                      |
|   |      |        |           |    | 2197.1 |      | R.DNLTLWTSDM<br>QGDGEEQNK.E  | Oxidation (M)        |
|   |      |        |           |    | 2197.1 |      | R.DNLTLWTSDM<br>QGDGEEQNK.E  | Oxidation (M)        |
| 2 | CH60 | P10809 | 1.60E-133 | 49 | 2113.3 | 1370 | R.ALMLQGVDLL<br>ADAVAVTMGPK. |                      |



|  |  |  |  |  |        |                                       |                                   |
|--|--|--|--|--|--------|---------------------------------------|-----------------------------------|
|  |  |  |  |  |        | G                                     |                                   |
|  |  |  |  |  | 2113.3 | R.ALMLQGVDLL<br>ADAVAVTMGPK.<br>G     |                                   |
|  |  |  |  |  | 1344.8 | R.TVIIEQSWGSP<br>K.V                  |                                   |
|  |  |  |  |  | 1344.8 | R.TVIIEQSWGSP<br>K.V                  |                                   |
|  |  |  |  |  | 2560.4 | K.LVQDVANNTN<br>EEAGDGTTTATV<br>LAR.S |                                   |
|  |  |  |  |  | 2560.4 | K.LVQDVANNTN<br>EEAGDGTTTATV<br>LAR.S |                                   |
|  |  |  |  |  | 855.53 | K.GANPVEIR.R                          |                                   |
|  |  |  |  |  | 855.53 | K.GANPVEIR.R                          |                                   |
|  |  |  |  |  | 1584.8 | R.RGVMLAVDAV<br>IAELK.K               |                                   |
|  |  |  |  |  | 1822.1 | K.DGKTLNDELEI<br>IEGMK.F              | Deamidated (NQ);<br>Oxidation (M) |
|  |  |  |  |  | 1822.1 | K.DGKTLNDELEI<br>IEGMK.F              | Deamidated (NQ);<br>Oxidation (M) |
|  |  |  |  |  | 1504.9 | K.TLNDELEIIEG<br>MK.F                 |                                   |
|  |  |  |  |  | 1504.9 | K.TLNDELEIIEG<br>MK.F                 |                                   |
|  |  |  |  |  | 1520.9 | K.TLNDELEIIEG<br>MK.F                 | Oxidation (M)                     |
|  |  |  |  |  | 1939.1 | K.TLNDELEIIEG<br>MKFDR.G              | Oxidation (M)                     |
|  |  |  |  |  | 1389.8 | R.GYISPYFINTSK.<br>G                  |                                   |
|  |  |  |  |  | 1389.8 | R.GYISPYFINTSK.<br>G                  |                                   |
|  |  |  |  |  | 1860.1 | K.GQKCEFQDAY<br>VLLSEK.K              | 2 Deamidated<br>(NQ)              |
|  |  |  |  |  | 1860.1 | K.GQKCEFQDAY                          | 2 Deamidated                      |

|  |  |  |  |        |  |                                |                        |
|--|--|--|--|--------|--|--------------------------------|------------------------|
|  |  |  |  |        |  | VLLSEK.K                       | (NQ)                   |
|  |  |  |  | 1601.9 |  | K.CEFQDAYVLLS<br>EK.K          | Carbamidomethyl<br>(C) |
|  |  |  |  | 1601.9 |  | K.CEFQDAYVLLS<br>EK.K          | Carbamidomethyl<br>(C) |
|  |  |  |  | 1919.2 |  | K.ISSIQSIVPALEI<br>ANAHR.K     |                        |
|  |  |  |  | 1919.2 |  | K.ISSIQSIVPALEI<br>ANAHR.K     |                        |
|  |  |  |  | 2365.5 |  | R.KPLVIIAEDVD<br>GEALSTLVLNR.L |                        |
|  |  |  |  | 2365.5 |  | R.KPLVIIAEDVD<br>GEALSTLVLNR.L |                        |
|  |  |  |  | 833.45 |  | K.APGFGDNR.K                   |                        |
|  |  |  |  | 833.45 |  | K.APGFGDNR.K                   |                        |
|  |  |  |  | 2194.3 |  | K.RIQEIIQLDVT<br>TSEYEK.E      |                        |
|  |  |  |  | 2194.3 |  | K.RIQEIIQLDVT<br>TSEYEK.E      |                        |
|  |  |  |  | 2038.2 |  | R.IQEIIQLDVTT<br>SEYEK.E       |                        |
|  |  |  |  | 2038.2 |  | R.IQEIIQLDVTT<br>SEYEK.E       |                        |
|  |  |  |  | 2295.3 |  | R.IQEIIQLDVTT<br>SEYEKEK.L     |                        |
|  |  |  |  | 2295.3 |  | R.IQEIIQLDVTT<br>SEYEKEK.L     |                        |
|  |  |  |  | 2297.3 |  | R.IQEIIQLDVTT<br>SEYEKEK.L     | 2 Deamidated<br>(NQ)   |
|  |  |  |  | 1233.7 |  | K.VGGTSDVEVN<br>EK.K           |                        |
|  |  |  |  | 960.58 |  | R.VTDALNATR.A                  |                        |
|  |  |  |  | 960.58 |  | R.VTDALNATR.A                  |                        |
|  |  |  |  | 961.57 |  | R.VTDALNATR.A                  | Deamidated (NQ)        |
|  |  |  |  | 1685   |  | R.AAVEEGIVLGG                  | Carbamidomethyl        |

|   |      |        |           |     |        |      |                                    |                        |
|---|------|--------|-----------|-----|--------|------|------------------------------------|------------------------|
|   |      |        |           |     |        |      | GCALLR.C                           | (C)                    |
|   |      |        |           |     | 1685   |      | R.AAVEEGIVLGG<br>GCALLR.C          | Carbamidomethyl<br>(C) |
|   |      |        |           |     | 1772   |      | R.CIPALDSLTPA<br>NEDQK.I           | Carbamidomethyl<br>(C) |
|   |      |        |           |     | 1772   |      | R.CIPALDSLTPA<br>NEDQK.I           | Carbamidomethyl<br>(C) |
|   |      |        |           |     | 1215.8 |      | K.NAGVEGSLIVE<br>K.I               |                        |
|   |      |        |           |     | 1215.8 |      | K.NAGVEGSLIVE<br>K.I               |                        |
|   |      |        |           |     | 2508.3 |      | K.IMQSSSEVGYD<br>AMAGDFVMVE<br>K.G |                        |
| 3 | ENOA | P06733 | 1.60E-178 | 71% | 766.39 | 1820 | R.EIFDSR.G                         |                        |
|   |      |        |           |     | 766.39 |      | R.EIFDSR.G                         |                        |
|   |      |        |           |     | 1406.8 |      | R.GNPTVEVDLFT<br>SK.G              |                        |
|   |      |        |           |     | 1406.8 |      | R.GNPTVEVDLFT<br>SK.G              |                        |
|   |      |        |           |     | 1805   |      | R.AAVPSGASTGI<br>YEALELR.D         |                        |
|   |      |        |           |     | 1805   |      | R.AAVPSGASTGI<br>YEALELR.D         |                        |
|   |      |        |           |     | 748.38 |      | R.DNDKTR.Y                         |                        |
|   |      |        |           |     | 748.38 |      | R.DNDKTR.Y                         |                        |
|   |      |        |           |     | 810.45 |      | K.AVEHINK.T                        |                        |
|   |      |        |           |     | 1088.6 |      | K.KLNVTEQEK.I                      |                        |
|   |      |        |           |     | 1088.6 |      | K.KLNVTEQEK.I                      |                        |
|   |      |        |           |     | 1280.6 |      | K.LMIEMDGTEN<br>K.S                |                        |
|   |      |        |           |     | 1280.6 |      | K.LMIEMDGTEN<br>K.S                |                        |

|  |  |  |  |  |        |  |                                            |                 |
|--|--|--|--|--|--------|--|--------------------------------------------|-----------------|
|  |  |  |  |  | 704.41 |  | K.GVPLYR.H                                 |                 |
|  |  |  |  |  | 704.41 |  | K.GVPLYR.H                                 |                 |
|  |  |  |  |  | 3012.6 |  | R.HIADLAGNSEV<br>ILPVPAFNVI<br>GG SHAGNK.L | Deamidated (NQ) |
|  |  |  |  |  | 3012.6 |  | R.HIADLAGNSEV<br>ILPVPAFNVI<br>GG SHAGNK.L | Deamidated (NQ) |
|  |  |  |  |  | 1908   |  | K.LAMQEFMILPV<br>GAANFR.E                  |                 |
|  |  |  |  |  | 1908   |  | K.LAMQEFMILPV<br>GAANFR.E                  |                 |
|  |  |  |  |  | 1924   |  | K.LAMQEFMILPV<br>GAANFR.E                  | Oxidation (M)   |
|  |  |  |  |  | 1924   |  | K.LAMQEFMILPV<br>GAANFR.E                  | Oxidation (M)   |
|  |  |  |  |  | 1940   |  | K.LAMQEFMILPV<br>GAANFR.E                  | 2 Oxidation (M) |
|  |  |  |  |  | 1940   |  | K.LAMQEFMILPV<br>GAANFR.E                  | 2 Oxidation (M) |
|  |  |  |  |  | 1143.6 |  | R.IGAEVYHNLK.<br>N                         |                 |
|  |  |  |  |  | 1143.6 |  | R.IGAEVYHNLK.<br>N                         |                 |
|  |  |  |  |  | 1597.8 |  | R.IGAEVYHNLKN<br>VIK.E                     |                 |
|  |  |  |  |  | 1961   |  | K.DATNVGDEGG<br>FAPNILENK.E                |                 |
|  |  |  |  |  | 1961   |  | K.DATNVGDEGG<br>FAPNILENK.E                |                 |
|  |  |  |  |  | 1540.8 |  | K.VVIGMDVAAS<br>EFFR.S                     |                 |
|  |  |  |  |  | 1540.8 |  | K.VVIGMDVAAS<br>EFFR.S                     |                 |
|  |  |  |  |  | 1556.8 |  | K.VVIGMDVAAS<br>EFFR.S                     | Oxidation (M)   |
|  |  |  |  |  | 1556.8 |  | K.VVIGMDVAAS                               | Oxidation (M)   |

|  |  |  |  |  |        |                                   |                                            |
|--|--|--|--|--|--------|-----------------------------------|--------------------------------------------|
|  |  |  |  |  |        | EFFR.S                            |                                            |
|  |  |  |  |  | 1072.6 | R.SGKYDLDFK.S                     |                                            |
|  |  |  |  |  | 1072.6 | R.SGKYDLDFK.S                     |                                            |
|  |  |  |  |  | 800.39 | K.YDLDFK.S                        |                                            |
|  |  |  |  |  | 800.39 | K.YDLDFK.S                        |                                            |
|  |  |  |  |  | 773.35 | K.SPDDPSR.Y                       |                                            |
|  |  |  |  |  | 773.35 | K.SPDDPSR.Y                       |                                            |
|  |  |  |  |  | 1425.8 | R.YISPDQLADLY<br>K.S              |                                            |
|  |  |  |  |  | 1425.8 | R.YISPDQLADLY<br>K.S              |                                            |
|  |  |  |  |  | 2510.2 | K.DYPVVSIEDPF<br>DQDDWGAWQK.<br>F |                                            |
|  |  |  |  |  | 2033.1 | K.FTASAGIQVVG<br>DDLTVTNP.K.R     |                                            |
|  |  |  |  |  | 2033.1 | K.FTASAGIQVVG<br>DDLTVTNP.K.R     |                                            |
|  |  |  |  |  | 1492.9 | K.AVNEKSCNCL<br>LLK.V             | Carbamidomethyl<br>(C); Deamidated<br>(NQ) |
|  |  |  |  |  | 1492.9 | K.AVNEKSCNCL<br>LLK.V             | Carboxymethyl<br>(C)                       |
|  |  |  |  |  | 1494.8 | K.AVNEKSCNCL<br>LLK.V             | Carboxymethyl<br>(C); 2 Deamidated<br>(NQ) |
|  |  |  |  |  | 1007.5 | K.SCNCLLLK.V                      | 2<br>Carbamidomethyl<br>(C)                |
|  |  |  |  |  | 1007.5 | K.SCNCLLLK.V                      | 2<br>Carbamidomethyl<br>(C)                |
|  |  |  |  |  | 1633.9 | K.VNQIGSVTESL<br>QACK.L           | Carbamidomethyl<br>(C)                     |
|  |  |  |  |  | 1633.9 | K.VNQIGSVTESL<br>QACK.L           | Carbamidomethyl<br>(C)                     |

|   |      |        |           |    |        |      |                                |                                   |
|---|------|--------|-----------|----|--------|------|--------------------------------|-----------------------------------|
|   |      |        |           |    | 1525.8 |      | K.LAQANGWGV<br>MVSHR.S         |                                   |
|   |      |        |           |    | 1526.8 |      | K.LAQANGWGV<br>MVSHR.S         | Deamidated (NQ)                   |
|   |      |        |           |    | 1526.8 |      | K.LAQANGWGV<br>MVSHR.S         | Deamidated (NQ)                   |
|   |      |        |           |    | 1542.8 |      | K.LAQANGWGV<br>MVSHR.S         | Deamidated (NQ);<br>Oxidation (M) |
|   |      |        |           |    | 2297.3 |      | R.SGETEDTFIAD<br>LVVGLCTGQIK.T | Deamidated (NQ)                   |
|   |      |        |           |    | 2297.3 |      | R.SGETEDTFIAD<br>LVVGLCTGQIK.T | Deamidated (NQ)                   |
|   |      |        |           |    | 2353.2 |      | R.SGETEDTFIAD<br>LVVGLCTGQIK.T | Carbamidomethyl<br>(C)            |
|   |      |        |           |    | 2353.2 |      | R.SGETEDTFIAD<br>LVVGLCTGQIK.T | Carbamidomethyl<br>(C)            |
|   |      |        |           |    | 806.46 |      | K.YNQLLR.I                     |                                   |
|   |      |        |           |    | 806.46 |      | K.YNQLLR.I                     |                                   |
|   |      |        |           |    |        |      |                                |                                   |
| 4 | ENOA | P06733 | 1.60E-136 | 58 | 766.4  | 1400 | R.EIFDSR.G                     |                                   |
|   |      |        |           |    | 766.4  |      | R.EIFDSR.G                     |                                   |
|   |      |        |           |    | 1406.8 |      | R.GNPTVEVDLFT<br>SK.G          |                                   |
|   |      |        |           |    | 1406.8 |      | R.GNPTVEVDLFT<br>SK.G          |                                   |
|   |      |        |           |    | 1805   |      | R.AAVPSGASTGI<br>YEALELR.D     |                                   |
|   |      |        |           |    | 1805   |      | R.AAVPSGASTGI<br>YEALELR.D     |                                   |
|   |      |        |           |    | 748.39 |      | R.DNDKTR.Y                     |                                   |
|   |      |        |           |    | 748.39 |      | R.DNDKTR.Y                     |                                   |
|   |      |        |           |    | 704.43 |      | K.GVPLYR.H                     |                                   |
|   |      |        |           |    | 704.43 |      | K.GVPLYR.H                     |                                   |
|   |      |        |           |    | 3011.7 |      | R.HIADLAGNSEV<br>ILPVPFNVINGG  |                                   |

|  |  |  |  |        |  |                                             |                 |
|--|--|--|--|--------|--|---------------------------------------------|-----------------|
|  |  |  |  |        |  | SHAGNK.L                                    |                 |
|  |  |  |  | 3012.7 |  | R.HIADLAGNSEV<br>ILPVPAFNVIINGG<br>SHAGNK.L | Deamidated (NQ) |
|  |  |  |  | 3012.7 |  | R.HIADLAGNSEV<br>ILPVPAFNVIINGG<br>SHAGNK.L | Deamidated (NQ) |
|  |  |  |  | 1908.1 |  | K.LAMQEFMILPV<br>GAANFR.E                   |                 |
|  |  |  |  | 1908.1 |  | K.LAMQEFMILPV<br>GAANFR.E                   |                 |
|  |  |  |  | 1924.1 |  | K.LAMQEFMILPV<br>GAANFR.E                   | Oxidation (M)   |
|  |  |  |  | 1924.1 |  | K.LAMQEFMILPV<br>GAANFR.E                   | Oxidation (M)   |
|  |  |  |  | 1940   |  | K.LAMQEFMILPV<br>GAANFR.E                   | 2 Oxidation (M) |
|  |  |  |  | 1940   |  | K.LAMQEFMILPV<br>GAANFR.E                   | 2 Oxidation (M) |
|  |  |  |  | 1143.7 |  | R.IGAEVYHNLK.<br>N                          |                 |
|  |  |  |  | 1143.7 |  | R.IGAEVYHNLK.<br>N                          |                 |
|  |  |  |  | 1961   |  | K.DATNVGDEGG<br>FAPNILENK.E                 |                 |
|  |  |  |  | 1961   |  | K.DATNVGDEGG<br>FAPNILENK.E                 |                 |
|  |  |  |  | 1540.9 |  | K.VVIGMDVAAS<br>EFFR.S                      |                 |
|  |  |  |  | 1540.9 |  | K.VVIGMDVAAS<br>EFFR.S                      |                 |
|  |  |  |  | 1556.8 |  | K.VVIGMDVAAS<br>EFFR.S                      | Oxidation (M)   |
|  |  |  |  | 1556.8 |  | K.VVIGMDVAAS<br>EFFR.S                      | Oxidation (M)   |
|  |  |  |  | 800.4  |  | K.YDLDFK.S                                  |                 |
|  |  |  |  | 800.4  |  | K.YDLDFK.S                                  |                 |

|  |  |  |  |  |        |  |                                     |                                            |
|--|--|--|--|--|--------|--|-------------------------------------|--------------------------------------------|
|  |  |  |  |  | 773.37 |  | K.SPDDPSR.Y                         |                                            |
|  |  |  |  |  | 1425.8 |  | R.YISPDQLADLY<br>K.S                |                                            |
|  |  |  |  |  | 1425.8 |  | R.YISPDQLADLY<br>K.S                |                                            |
|  |  |  |  |  | 2033.1 |  | K.FTASAGIQVVG<br>DDLTVTNPK.R        |                                            |
|  |  |  |  |  | 2033.1 |  | K.FTASAGIQVVG<br>DDLTVTNPK.R        |                                            |
|  |  |  |  |  | 1492.9 |  | K.AVNEKSCNCL<br>LLK.V               | Carbamidomethyl<br>(C); Deamidated<br>(NQ) |
|  |  |  |  |  | 1492.9 |  | K.AVNEKSCNCL<br>LLK.V               | Carboxymethyl<br>(C)                       |
|  |  |  |  |  | 2510.2 |  | K.SCNCLLLKVN<br>QIGSVTESLQACK<br>.L | Carboxymethyl<br>(C); Deamidated<br>(NQ)   |
|  |  |  |  |  | 1633.9 |  | K.VNQIGSVTESL<br>QACK.L             | Carbamidomethyl<br>(C)                     |
|  |  |  |  |  | 1633.9 |  | K.VNQIGSVTESL<br>QACK.L             | Carbamidomethyl<br>(C)                     |
|  |  |  |  |  | 1525.8 |  | K.LAQANGWGV<br>MVSHR.S              |                                            |
|  |  |  |  |  | 1526.8 |  | K.LAQANGWGV<br>MVSHR.S              | Deamidated (NQ)                            |
|  |  |  |  |  | 1526.8 |  | K.LAQANGWGV<br>MVSHR.S              | Deamidated (NQ)                            |
|  |  |  |  |  | 1542.8 |  | K.LAQANGWGV<br>MVSHR.S              | Deamidated (NQ);<br>Oxidation (M)          |
|  |  |  |  |  | 2297.3 |  | R.SGETEDTFIAD<br>LVVGLCTGQIK.T      | Deamidated (NQ)                            |
|  |  |  |  |  | 2297.3 |  | R.SGETEDTFIAD<br>LVVGLCTGQIK.T      | Deamidated (NQ)                            |
|  |  |  |  |  | 2353.2 |  | R.SGETEDTFIAD<br>LVVGLCTGQIK.T      | Carbamidomethyl<br>(C)                     |
|  |  |  |  |  | 2353.2 |  | R.SGETEDTFIAD<br>LVVGLCTGQIK.T      | Carbamidomethyl<br>(C)                     |



|   |      |        |          |    |        |     |                            |                 |
|---|------|--------|----------|----|--------|-----|----------------------------|-----------------|
|   |      |        |          |    | 806.48 |     | K.YNQLLR.I                 |                 |
|   |      |        |          |    | 806.48 |     | K.YNQLLR.I                 |                 |
| 5 | ENOA | P06733 | 1.60E-71 | 42 | 766.39 | 750 | R.EIFDSR.G                 |                 |
|   |      |        |          |    | 766.39 |     | R.EIFDSR.G                 |                 |
|   |      |        |          |    | 1406.8 |     | R.GNPTVEVDLFT<br>SK.G      |                 |
|   |      |        |          |    | 1406.8 |     | R.GNPTVEVDLFT<br>SK.G      |                 |
|   |      |        |          |    | 1805   |     | R.AAVPSGASTGI<br>YEALELR.D |                 |
|   |      |        |          |    | 1805   |     | R.AAVPSGASTGI<br>YEALELR.D |                 |
|   |      |        |          |    | 704.43 |     | K.GVPLYR.H                 |                 |
|   |      |        |          |    | 704.43 |     | K.GVPLYR.H                 |                 |
|   |      |        |          |    | 1908.1 |     | K.LAMQEFMILPV<br>GAANFR.E  |                 |
|   |      |        |          |    | 1908.1 |     | K.LAMQEFMILPV<br>GAANFR.E  |                 |
|   |      |        |          |    | 1924   |     | K.LAMQEFMILPV<br>GAANFR.E  | Oxidation (M)   |
|   |      |        |          |    | 1924   |     | K.LAMQEFMILPV<br>GAANFR.E  | Oxidation (M)   |
|   |      |        |          |    | 1940   |     | K.LAMQEFMILPV<br>GAANFR.E  | 2 Oxidation (M) |
|   |      |        |          |    | 1940   |     | K.LAMQEFMILPV<br>GAANFR.E  | 2 Oxidation (M) |
|   |      |        |          |    | 1143.7 |     | R.IGAEVYHNLK.<br>N         |                 |
|   |      |        |          |    | 1143.7 |     | R.IGAEVYHNLK.<br>N         |                 |
|   |      |        |          |    | 1540.8 |     | K.VVIGMDVAAS<br>EFFR.S     |                 |
|   |      |        |          |    | 1540.8 |     | K.VVIGMDVAAS<br>EFFR.S     |                 |

|  |  |  |  |  |        |                                |                                   |
|--|--|--|--|--|--------|--------------------------------|-----------------------------------|
|  |  |  |  |  | 1556.8 | K.VVIGMDVAAS<br>EFFR.S         | Oxidation (M)                     |
|  |  |  |  |  | 1556.8 | K.VVIGMDVAAS<br>EFFR.S         | Oxidation (M)                     |
|  |  |  |  |  | 1425.8 | R.YISPDQLADLY<br>K.S           |                                   |
|  |  |  |  |  | 1425.8 | R.YISPDQLADLY<br>K.S           |                                   |
|  |  |  |  |  | 2033.1 | K.FTASAGIQVVG<br>DDLTVTNPK.R   |                                   |
|  |  |  |  |  | 2033.1 | K.FTASAGIQVVG<br>DDLTVTNPK.R   |                                   |
|  |  |  |  |  | 1633.9 | K.VNQIGSVTESL<br>QACK.L        | Carbamidomethyl<br>(C)            |
|  |  |  |  |  | 1633.9 | K.VNQIGSVTESL<br>QACK.L        | Carbamidomethyl<br>(C)            |
|  |  |  |  |  | 1525.8 | K.LAQANGWGV<br>MVSHR.S         |                                   |
|  |  |  |  |  | 1526.8 | K.LAQANGWGV<br>MVSHR.S         | Deamidated (NQ)                   |
|  |  |  |  |  | 1526.8 | K.LAQANGWGV<br>MVSHR.S         | Deamidated (NQ)                   |
|  |  |  |  |  | 1542.8 | K.LAQANGWGV<br>MVSHR.S         | Deamidated (NQ);<br>Oxidation (M) |
|  |  |  |  |  | 2297.3 | R.SGETEDTFIAD<br>LVVGLCTGQIK.T | Deamidated (NQ)                   |
|  |  |  |  |  | 2297.3 | R.SGETEDTFIAD<br>LVVGLCTGQIK.T | Deamidated (NQ)                   |
|  |  |  |  |  | 2353.3 | R.SGETEDTFIAD<br>LVVGLCTGQIK.T | Carbamidomethyl<br>(C)            |
|  |  |  |  |  | 2353.3 | R.SGETEDTFIAD<br>LVVGLCTGQIK.T | Carbamidomethyl<br>(C)            |
|  |  |  |  |  | 806.47 | K.YNQLLR.I                     |                                   |
|  |  |  |  |  | 806.47 | K.YNQLLR.I                     |                                   |
|  |  |  |  |  | 1103.6 | R.IEEELGSKAK.F                 |                                   |
|  |  |  |  |  |        |                                |                                   |

|   |       |        |          |    |        |     |                                       |               |
|---|-------|--------|----------|----|--------|-----|---------------------------------------|---------------|
| 6 | ANXA5 | P08758 | 2.00E-29 | 52 | 1340.8 | 329 | R.GTVTDFPGFDE<br>R.A                  |               |
|   |       |        |          |    | 1340.8 |     | R.GTVTDFPGFDE<br>R.A                  |               |
|   |       |        |          |    | 1705.1 |     | K.GLGTDEESILT<br>LLTSR.S              |               |
|   |       |        |          |    | 1705.1 |     | K.GLGTDEESILT<br>LLTSR.S              |               |
|   |       |        |          |    | 1143.8 |     | K.LIVALMKPSR.L                        | Oxidation (M) |
|   |       |        |          |    | 1014.6 |     | R.LYDAYELK.H                          |               |
|   |       |        |          |    | 1014.6 |     | R.LYDAYELK.H                          |               |
|   |       |        |          |    | 1125.7 |     | K.HALKGAGTNE<br>K.V                   |               |
|   |       |        |          |    | 1125.7 |     | K.HALKGAGTNE<br>K.V                   |               |
|   |       |        |          |    | 1001.7 |     | K.VLTEIIASR.T                         |               |
|   |       |        |          |    | 1001.7 |     | K.VLTEIIASR.T                         |               |
|   |       |        |          |    | 744.46 |     | R.TPEELR.A                            |               |
|   |       |        |          |    | 744.46 |     | R.TPEELR.A                            |               |
|   |       |        |          |    | 2888.5 |     | K.QVYEEEEYGSSL<br>EDDVVGDTSGY<br>QR.M |               |
|   |       |        |          |    | 2888.5 |     | K.QVYEEEEYGSSL<br>EDDVVGDTSGY<br>QR.M |               |
|   |       |        |          |    | 1156.8 |     | R.MLVVLLQANR.<br>D                    |               |
|   |       |        |          |    | 1156.8 |     | R.MLVVLLQANR.<br>D                    |               |
|   |       |        |          |    | 1172.8 |     | R.MLVVLLQANR.<br>D                    | Oxidation (M) |
|   |       |        |          |    | 1172.8 |     | R.MLVVLLQANR.<br>D                    | Oxidation (M) |
|   |       |        |          |    | 864.46 |     | K.WGTDEEK.F                           |               |

|   |       |        |          |    |        |     |                         |               |
|---|-------|--------|----------|----|--------|-----|-------------------------|---------------|
|   |       |        |          |    | 864.46 |     | K.WGTDEEK.F             |               |
|   |       |        |          |    | 1800.1 |     | K.WGTDEEKFITI<br>FGTR.S |               |
|   |       |        |          |    | 954.64 |     | K.FITIFGTR.S            |               |
|   |       |        |          |    | 954.64 |     | K.FITIFGTR.S            |               |
|   |       |        |          |    | 1803.1 |     | K.YMTISGFQIEET<br>IDR.E |               |
|   |       |        |          |    | 1819   |     | K.YMTISGFQIEET<br>IDR.E | Oxidation (M) |
|   |       |        |          |    | 1819   |     | K.YMTISGFQIEET<br>IDR.E | Oxidation (M) |
|   |       |        |          |    | 1155.7 |     | K.GAGTDDHTLIR<br>.V     |               |
|   |       |        |          |    | 1106.7 |     | R.SEIDLFNIR.K           |               |
|   |       |        |          |    | 1106.7 |     | R.SEIDLFNIR.K           |               |
|   |       |        |          |    | 1234.8 |     | R.SEIDLFNIRK.E          |               |
|   |       |        |          |    | 1274.8 |     | K.NFATSLYSMIK.<br>G     |               |
|   |       |        |          |    | 1274.8 |     | K.NFATSLYSMIK.<br>G     |               |
|   |       |        |          |    | 1290.8 |     | K.NFATSLYSMIK.<br>G     | Oxidation (M) |
|   |       |        |          |    | 1290.8 |     | K.NFATSLYSMIK.<br>G     | Oxidation (M) |
|   |       |        |          |    |        |     |                         |               |
| 7 | ERP29 | P30040 | 2.50E-38 | 57 | 1324.8 | 418 | K.GALPLDVTIFY<br>K.V    |               |
|   |       |        |          |    | 1324.8 |     | K.GALPLDVTIFY<br>K.V    |               |
|   |       |        |          |    | 1247.6 |     | K.FDTQYPYGEK.<br>Q      |               |
|   |       |        |          |    | 1247.6 |     | K.FDTQYPYGEK.<br>Q      |               |
|   |       |        |          |    | 822.44 |     | K.QDEFKR.L              |               |

|  |  |  |  |  |        |  |                                      |                                   |
|--|--|--|--|--|--------|--|--------------------------------------|-----------------------------------|
|  |  |  |  |  | 822.44 |  | K.QDEFKR.L                           |                                   |
|  |  |  |  |  | 2468.3 |  | R.LAENSASSDDL<br>LVAEVGISDYGD<br>K.L |                                   |
|  |  |  |  |  | 1320.7 |  | K.ESYPVFYLF.R.D                      |                                   |
|  |  |  |  |  | 1608.8 |  | R.DGDFENVPYPT<br>GAVK.V              |                                   |
|  |  |  |  |  | 1608.8 |  | R.DGDFENVPYPT<br>GAVK.V              |                                   |
|  |  |  |  |  | 2233.3 |  | R.DGDFENVPYPT<br>GAVKVGAIQR.W        |                                   |
|  |  |  |  |  | 2234.2 |  | R.DGDFENVPYPT<br>GAVKVGAIQR.W        | Deamidated (NQ)                   |
|  |  |  |  |  | 2583.4 |  | K.GQGVYLGMPG<br>CLPVYDALAGEFI<br>R.A | Carbamidomethyl<br>(C)            |
|  |  |  |  |  | 2583.4 |  | K.GQGVYLGMPG<br>CLPVYDALAGEFI<br>R.A | Carbamidomethyl<br>(C)            |
|  |  |  |  |  | 1065.6 |  | K.KWAEQYLK.I                         |                                   |
|  |  |  |  |  | 1065.6 |  | K.KWAEQYLK.I                         |                                   |
|  |  |  |  |  | 937.52 |  | K.WAEQYLK.I                          |                                   |
|  |  |  |  |  | 937.52 |  | K.WAEQYLK.I                          |                                   |
|  |  |  |  |  | 1383.8 |  | K.WAEQYLKIMG<br>K.I                  | Deamidated (NQ);<br>Oxidation (M) |
|  |  |  |  |  | 1708.9 |  | K.ILDQGEDFPAS<br>EMTR.I              |                                   |
|  |  |  |  |  | 1708.9 |  | K.ILDQGEDFPAS<br>EMTR.I              |                                   |
|  |  |  |  |  | 1724.9 |  | K.ILDQGEDFPAS<br>EMTR.I              | Oxidation (M)                     |
|  |  |  |  |  | 1724.9 |  | K.ILDQGEDFPAS<br>EMTR.I              | Oxidation (M)                     |
|  |  |  |  |  | 842.54 |  | R.IARLIEK.N                          |                                   |
|  |  |  |  |  | 1134.7 |  | K.SLNILTAFAQK.K                      |                                   |

|   |       |        |          |    |        |     |                                    |                                        |
|---|-------|--------|----------|----|--------|-----|------------------------------------|----------------------------------------|
|   |       |        |          |    | 1134.7 |     | K.SLNILTAFQK.K                     |                                        |
| 8 | HSP7C | P11142 | 1.60E-55 | 43 | 2263.3 | 590 | K.GPAVGIDLGTT<br>YSCVGVFQHGK.<br>V | Carbamidomethyl<br>(C)                 |
|   |       |        |          |    | 2263.3 |     | K.GPAVGIDLGTT<br>YSCVGVFQHGK.<br>V | Carbamidomethyl<br>(C)                 |
|   |       |        |          |    | 1228.7 |     | K.VEIIANDQGNR.<br>T                |                                        |
|   |       |        |          |    | 1228.7 |     | K.VEIIANDQGNR.<br>T                |                                        |
|   |       |        |          |    | 1487.8 |     | R.TTPSYVAFTDT<br>ER.L              |                                        |
|   |       |        |          |    | 1487.8 |     | R.TTPSYVAFTDT<br>ER.L              |                                        |
|   |       |        |          |    | 1670   |     | K.NQVAMNPTNT<br>VFDAK.R            | 4 Deamidated<br>(NQ); Oxidation<br>(M) |
|   |       |        |          |    | 1410.8 |     | R.RFDDAVVQSD<br>MK.H               |                                        |
|   |       |        |          |    | 1410.8 |     | R.RFDDAVVQSD<br>MK.H               |                                        |
|   |       |        |          |    | 1426.8 |     | R.RFDDAVVQSD<br>MK.H               | Oxidation (M)                          |
|   |       |        |          |    | 1616.9 |     | K.SFYPEEVSSMV<br>LTK.M             |                                        |
|   |       |        |          |    | 1982.2 |     | K.TVTNAVVTVP<br>AYFNDSQR.Q         |                                        |
|   |       |        |          |    | 1982.2 |     | K.TVTNAVVTVP<br>AYFNDSQR.Q         |                                        |
|   |       |        |          |    | 1199.8 |     | K.DAGTIAGLNVL<br>R.I               |                                        |
|   |       |        |          |    | 1199.8 |     | K.DAGTIAGLNVL<br>R.I               |                                        |
|   |       |        |          |    | 1660   |     | R.IINEPTAAAIAY<br>GLDK.K           |                                        |
|   |       |        |          |    | 1660   |     | R.IINEPTAAAIAY                     |                                        |

|  |  |  |  |  |        |                                     |                      |
|--|--|--|--|--|--------|-------------------------------------|----------------------|
|  |  |  |  |  |        | GLDK.K                              |                      |
|  |  |  |  |  | 1788.1 | R.IINEPTAAAIAY<br>GLDKK.V           |                      |
|  |  |  |  |  | 1691.9 | K.STAGDTHLGG<br>EDFDNR.M            |                      |
|  |  |  |  |  | 1691.9 | K.STAGDTHLGG<br>EDFDNR.M            |                      |
|  |  |  |  |  | 1235.7 | R.MVNHFIAEFK.<br>R                  |                      |
|  |  |  |  |  | 1235.7 | R.MVNHFIAEFK.<br>R                  |                      |
|  |  |  |  |  | 1480.9 | R.ARFEELNADLF<br>R.G                |                      |
|  |  |  |  |  | 1253.7 | R.FEELNADLFR.G                      |                      |
|  |  |  |  |  | 1253.7 | R.FEELNADLFR.G                      |                      |
|  |  |  |  |  | 1481.9 | K.SQIHDIVLVGG<br>STR.I              |                      |
|  |  |  |  |  | 1450.8 | K.IQKLLQDFNG<br>K.E                 |                      |
|  |  |  |  |  | 1081.6 | K.LLQDFNGK.E                        |                      |
|  |  |  |  |  | 1081.6 | K.LLQDFNGK.E                        |                      |
|  |  |  |  |  | 1082.6 | K.LLQDFNGK.E                        | Deamidated (NQ)      |
|  |  |  |  |  | 1566.9 | K.LLQDFNGKEL<br>NK.S                | Deamidated (NQ)      |
|  |  |  |  |  | 1566.9 | K.LLQDFNGKEL<br>NK.S                | Deamidated (NQ)      |
|  |  |  |  |  | 1567.9 | K.LLQDFNGKEL<br>NK.S                | 2 Deamidated<br>(NQ) |
|  |  |  |  |  | 2774.5 | K.QTQTFTTYSN<br>QPGVLIQVYEGE<br>R.A |                      |
|  |  |  |  |  | 2774.5 | K.QTQTFTTYSN<br>QPGVLIQVYEGE<br>R.A |                      |
|  |  |  |  |  | 1126.7 | R.MVQEAEKYK.<br>A                   | Deamidated (NQ)      |

|   |       |        |           |    |        |      |                                    |                        |
|---|-------|--------|-----------|----|--------|------|------------------------------------|------------------------|
|   |       |        |           |    | 1126.7 |      | R.MVQEAEKYK.<br>A                  | Deamidated (NQ)        |
|   |       |        |           |    | 1303.7 |      | K.NSLESYAFNM<br>K.A                |                        |
|   |       |        |           |    | 1303.7 |      | K.NSLESYAFNM<br>K.A                |                        |
|   |       |        |           |    | 1304.7 |      | K.CNEIINWLDK.<br>N                 | Carbamidomethyl<br>(C) |
|   |       |        |           |    | 1745.9 |      | K.NQTAEKEEFEH<br>QQK.E             |                        |
|   |       |        |           |    | 1745.9 |      | K.NQTAEKEEFEH<br>QQK.E             |                        |
|   |       |        |           |    | 1444.8 |      | K.ELEKVCNPIITK<br>.L               | Carboxymethyl<br>(C)   |
|   |       |        |           |    |        |      |                                    |                        |
| 9 | HSP7C | P11142 | 1.60E-167 | 55 | 2263.3 | 1710 | K.GPAVGIDLGTT<br>YSCVGVFQHGK.<br>V | Carbamidomethyl<br>(C) |
|   |       |        |           |    | 2263.3 |      | K.GPAVGIDLGTT<br>YSCVGVFQHGK.<br>V | Carbamidomethyl<br>(C) |
|   |       |        |           |    | 1228.7 |      | K.VEIIANDQGNR.<br>T                |                        |
|   |       |        |           |    | 1228.7 |      | K.VEIIANDQGNR.<br>T                |                        |
|   |       |        |           |    | 1487.8 |      | R.TTPSYVAFTDT<br>ER.L              |                        |
|   |       |        |           |    | 1487.8 |      | R.TTPSYVAFTDT<br>ER.L              |                        |
|   |       |        |           |    | 1649.9 |      | K.NQVAMNPTNT<br>VFDAK.R            |                        |
|   |       |        |           |    | 1649.9 |      | K.NQVAMNPTNT<br>VFDAK.R            |                        |
|   |       |        |           |    | 1665.9 |      | K.NQVAMNPTNT<br>VFDAK.R            | Oxidation (M)          |
|   |       |        |           |    | 1410.8 |      | R.RFDDAVVQSD<br>MK.H               |                        |
|   |       |        |           |    | 1410.8 |      | R.RFDDAVVQSD                       |                        |



|  |  |  |  |        |  |                            |                                   |
|--|--|--|--|--------|--|----------------------------|-----------------------------------|
|  |  |  |  |        |  | MK.H                       |                                   |
|  |  |  |  | 1426.8 |  | R.RFDDAVVQSD<br>MK.H       | Oxidation (M)                     |
|  |  |  |  | 1670.9 |  | K.HWPFMVVNDA<br>GRPK.V     | Deamidated (NQ);<br>Oxidation (M) |
|  |  |  |  | 1670.9 |  | K.HWPFMVVNDA<br>GRPK.V     | Deamidated (NQ);<br>Oxidation (M) |
|  |  |  |  | 1616.9 |  | K.SFYPEEVSSMV<br>LTK.M     |                                   |
|  |  |  |  | 1616.9 |  | K.SFYPEEVSSMV<br>LTK.M     |                                   |
|  |  |  |  | 1632.9 |  | K.SFYPEEVSSMV<br>LTK.M     | Oxidation (M)                     |
|  |  |  |  | 993.58 |  | K.EIAEAYLGK.T              |                                   |
|  |  |  |  | 993.58 |  | K.EIAEAYLGK.T              |                                   |
|  |  |  |  | 1982.1 |  | K.TVTNAVVTVP<br>AYFNDSQR.Q |                                   |
|  |  |  |  | 1982.1 |  | K.TVTNAVVTVP<br>AYFNDSQR.Q |                                   |
|  |  |  |  | 1199.8 |  | K.DAGTIAGLNVL<br>R.I       |                                   |
|  |  |  |  | 1199.8 |  | K.DAGTIAGLNVL<br>R.I       |                                   |
|  |  |  |  | 1660   |  | R.IINEPTAAAIAY<br>GLDK.K   |                                   |
|  |  |  |  | 1660   |  | R.IINEPTAAAIAY<br>GLDK.K   |                                   |
|  |  |  |  | 1788.1 |  | R.IINEPTAAAIAY<br>GLDKK.V  |                                   |
|  |  |  |  | 1788.1 |  | R.IINEPTAAAIAY<br>GLDKK.V  |                                   |
|  |  |  |  | 1691.8 |  | K.STAGDTHLGG<br>EDFDNR.M   |                                   |
|  |  |  |  | 1691.8 |  | K.STAGDTHLGG<br>EDFDNR.M   |                                   |
|  |  |  |  | 1235.7 |  | R.MVNHFIAEFK.              |                                   |

|  |  |  |  |  |        |                                          |                      |
|--|--|--|--|--|--------|------------------------------------------|----------------------|
|  |  |  |  |  |        | R                                        |                      |
|  |  |  |  |  | 1235.7 | R.MVNHFIAEFK.<br>R                       |                      |
|  |  |  |  |  | 1251.7 | R.MVNHFIAEFK.<br>R                       | Oxidation (M)        |
|  |  |  |  |  | 2997.7 | R.TLSSSTQASIEI<br>DSL YEGIDFYTSI<br>TR.A |                      |
|  |  |  |  |  | 2997.7 | R.TLSSSTQASIEI<br>DSL YEGIDFYTSI<br>TR.A |                      |
|  |  |  |  |  | 1480.9 | R.ARFEELNADLF<br>R.G                     |                      |
|  |  |  |  |  | 1253.7 | R.FEELNADLFR.G                           |                      |
|  |  |  |  |  | 1253.7 | R.FEELNADLFR.G                           |                      |
|  |  |  |  |  | 1481.9 | K.SQIHDI VLVGG<br>STR.I                  |                      |
|  |  |  |  |  | 1450.8 | K.IQKLLQDF FNG<br>K.E                    |                      |
|  |  |  |  |  | 1081.6 | K.LLQDF FNGK.E                           |                      |
|  |  |  |  |  | 1082.6 | K.LLQDF FNGK.E                           | Deamidated (NQ)      |
|  |  |  |  |  | 1082.6 | K.LLQDF FNGK.E                           | Deamidated (NQ)      |
|  |  |  |  |  | 1567.9 | K.LLQDF FNGKEL<br>NK.S                   | 2 Deamidated<br>(NQ) |
|  |  |  |  |  | 1567.9 | K.LLQDF FNGKEL<br>NK.S                   | 2 Deamidated<br>(NQ) |
|  |  |  |  |  | 2260.3 | K.SINPDEAVAYG<br>AAVQAAILSGDK.<br>S      |                      |
|  |  |  |  |  | 2774.5 | K.QTQTFTTYS DN<br>QPGVLIQVYEGE<br>R.A    |                      |
|  |  |  |  |  | 2774.5 | K.QTQTFTTYS DN<br>QPGVLIQVYEGE<br>R.A    |                      |
|  |  |  |  |  | 1197.7 | K.FELTGIPPAPR.<br>G                      |                      |

|    |       |        |          |    |        |     |                          |                        |
|----|-------|--------|----------|----|--------|-----|--------------------------|------------------------|
|    |       |        |          |    | 1303.7 |     | K.NSLESYAFNM<br>K.A      |                        |
|    |       |        |          |    | 1319.7 |     | K.NSLESYAFNM<br>K.A      | Oxidation (M)          |
|    |       |        |          |    | 1304.7 |     | K.CNEIINWLDK.<br>N       | Carbamidomethyl<br>(C) |
|    |       |        |          |    | 1304.7 |     | K.CNEIINWLDK.<br>N       | Carbamidomethyl<br>(C) |
|    |       |        |          |    | 1745.9 |     | K.NQTAEKEEFEH<br>QQK.E   |                        |
|    |       |        |          |    | 1745.9 |     | K.NQTAEKEEFEH<br>QQK.E   |                        |
|    |       |        |          |    | 1074.6 |     | K.EEFEHQQK.E             |                        |
|    |       |        |          |    | 1074.6 |     | K.EEFEHQQK.E             |                        |
|    |       |        |          |    | 1444.8 |     | K.ELEKVCNPIITK<br>.L     | Carboxymethyl<br>(C)   |
|    |       |        |          |    |        |     |                          |                        |
| 10 | HSPB1 | P04792 | 1.20E-30 | 40 | 831.55 | 341 | R.VPFSLLR.G              |                        |
|    |       |        |          |    | 831.55 |     | R.VPFSLLR.G              |                        |
|    |       |        |          |    | 961.5  |     | R.GPSWDPFR.D             |                        |
|    |       |        |          |    | 961.5  |     | R.GPSWDPFR.D             |                        |
|    |       |        |          |    | 960.49 |     | R.DWYPHSR.L              |                        |
|    |       |        |          |    | 1163.7 |     | R.LFDQAFGLPR.L           |                        |
|    |       |        |          |    | 1163.7 |     | R.LFDQAFGLPR.L           |                        |
|    |       |        |          |    | 1075.6 |     | R.QLSSGVSEIR.H           |                        |
|    |       |        |          |    | 1075.6 |     | R.QLSSGVSEIR.H           |                        |
|    |       |        |          |    | 1784   |     | R.VSLDVNHFAPD<br>ELTVK.T |                        |
|    |       |        |          |    | 1784   |     | R.VSLDVNHFAPD<br>ELTVK.T |                        |
|    |       |        |          |    | 1785   |     | R.VSLDVNHFAPD<br>ELTVK.T | Deamidated (NQ)        |
|    |       |        |          |    | 1104.6 |     | R.QDEHGYISR.C            |                        |

|    |       |        |           |    |        |      |                                                    |                      |
|----|-------|--------|-----------|----|--------|------|----------------------------------------------------|----------------------|
|    |       |        |           |    | 1104.6 |      | R.QDEHGYISR.C                                      |                      |
|    |       |        |           |    | 1906.1 |      | K.LATQSNEITIPV<br>TFESR.A                          |                      |
|    |       |        |           |    | 1906.1 |      | K.LATQSNEITIPV<br>TFESR.A                          |                      |
|    |       |        |           |    |        |      |                                                    |                      |
| 11 | K1C18 | P05783 | 1.60E-198 | 72 | 975.49 | 2020 | R.STFSTNYR.S                                       |                      |
|    |       |        |           |    | 975.49 |      | R.STFSTNYR.S                                       |                      |
|    |       |        |           |    | 2261.2 |      | R.GGMGSGGLAT<br>GIAGGLAGMGGI<br>QNEK.E             |                      |
|    |       |        |           |    | 2261.2 |      | R.GGMGSGGLAT<br>GIAGGLAGMGGI<br>QNEK.E             |                      |
|    |       |        |           |    | 2277.2 |      | R.GGMGSGGLAT<br>GIAGGLAGMGGI<br>QNEK.E             | Oxidation (M)        |
|    |       |        |           |    | 2277.2 |      | R.GGMGSGGLAT<br>GIAGGLAGMGGI<br>QNEK.E             | Oxidation (M)        |
|    |       |        |           |    | 3337.9 |      | R.GGMGSGGLAT<br>GIAGGLAGMGGI<br>QNEKETMQLND<br>R.L | 2 Deamidated<br>(NQ) |
|    |       |        |           |    | 3337.9 |      | R.GGMGSGGLAT<br>GIAGGLAGMGGI<br>QNEKETMQLND<br>R.L | 2 Deamidated<br>(NQ) |
|    |       |        |           |    | 1093.6 |      | K.ETMQLNDR.L                                       |                      |
|    |       |        |           |    | 1109.5 |      | K.ETMQLNDR.L                                       | Oxidation (M)        |
|    |       |        |           |    | 1109.5 |      | K.ETMQLNDR.L                                       | Oxidation (M)        |
|    |       |        |           |    | 837.47 |      | R.LASYLDR.V                                        |                      |
|    |       |        |           |    | 837.47 |      | R.LASYLDR.V                                        |                      |
|    |       |        |           |    | 924.55 |      | K.IREHLEK.K                                        |                      |
|    |       |        |           |    | 924.55 |      | K.IREHLEK.K                                        |                      |
|    |       |        |           |    | 982.47 |      | R.DWSHYFK.I                                        |                      |

|  |  |  |  |  |        |                           |               |
|--|--|--|--|--|--------|---------------------------|---------------|
|  |  |  |  |  | 982.47 | R.DWSHYFK.I               |               |
|  |  |  |  |  | 758.48 | K.IIEDLR.A                |               |
|  |  |  |  |  | 758.48 | K.IIEDLR.A                |               |
|  |  |  |  |  | 1319.7 | R.AQIFANTVDNA<br>R.I      |               |
|  |  |  |  |  | 1319.7 | R.AQIFANTVDNA<br>R.I      |               |
|  |  |  |  |  | 1041.7 | R.IVLQIDNAR.L             |               |
|  |  |  |  |  | 1041.7 | R.IVLQIDNAR.L             |               |
|  |  |  |  |  | 807.42 | R.LAADDFR.V               |               |
|  |  |  |  |  | 807.42 | R.LAADDFR.V               |               |
|  |  |  |  |  | 1239.7 | R.VKYETELAMR.<br>Q        |               |
|  |  |  |  |  | 1239.7 | R.VKYETELAMR.<br>Q        |               |
|  |  |  |  |  | 1255.7 | R.VKYETELAMR.<br>Q        | Oxidation (M) |
|  |  |  |  |  | 1012.5 | K.YETELAMR.Q              |               |
|  |  |  |  |  | 1028.5 | K.YETELAMR.Q              | Oxidation (M) |
|  |  |  |  |  | 1028.5 | K.YETELAMR.Q              | Oxidation (M) |
|  |  |  |  |  | 1267.7 | R.QSVENDIHGLR.<br>K       |               |
|  |  |  |  |  | 1267.7 | R.QSVENDIHGLR.<br>K       |               |
|  |  |  |  |  | 1395.8 | R.QSVENDIHGLR<br>K.V      |               |
|  |  |  |  |  | 1395.8 | R.QSVENDIHGLR<br>K.V      |               |
|  |  |  |  |  | 1046.6 | K.VIDDTNITR.L             |               |
|  |  |  |  |  | 2177.3 | R.LQLETEIEALK<br>EELFMK.K |               |
|  |  |  |  |  | 2177.3 | R.LQLETEIEALK<br>EELFMK.K |               |

|  |  |  |  |  |        |                                            |               |
|--|--|--|--|--|--------|--------------------------------------------|---------------|
|  |  |  |  |  | 2193.3 | R.LQLETEIEALK<br>EELLFMK.K                 | Oxidation (M) |
|  |  |  |  |  | 2193.3 | R.LQLETEIEALK<br>EELLFMK.K                 | Oxidation (M) |
|  |  |  |  |  | 1012.5 | K.KNHEEEVK.G                               |               |
|  |  |  |  |  | 1884.1 | K.GLQAQIASSGL<br>TVEVDAPK.S                |               |
|  |  |  |  |  | 1884.1 | K.GLQAQIASSGL<br>TVEVDAPK.S                |               |
|  |  |  |  |  | 718.42 | K.IMADIR.A                                 |               |
|  |  |  |  |  | 718.42 | K.IMADIR.A                                 |               |
|  |  |  |  |  | 965.51 | R.AQYDELAR.K                               |               |
|  |  |  |  |  | 965.51 | R.AQYDELAR.K                               |               |
|  |  |  |  |  | 1093.6 | R.AQYDELARK.N                              |               |
|  |  |  |  |  | 3428.8 | K.YWSQQIEESTT<br>VVTTQSAEVGAA<br>ETTLTEL.R |               |
|  |  |  |  |  | 3428.8 | K.YWSQQIEESTT<br>VVTTQSAEVGAA<br>ETTLTEL.R |               |
|  |  |  |  |  | 1506.8 | R.TVQSLEIDLDS<br>MR.N                      |               |
|  |  |  |  |  | 1506.8 | R.TVQSLEIDLDS<br>MR.N                      |               |
|  |  |  |  |  | 1522.8 | R.TVQSLEIDLDS<br>MR.N                      | Oxidation (M) |
|  |  |  |  |  | 1522.8 | R.TVQSLEIDLDS<br>MR.N                      | Oxidation (M) |
|  |  |  |  |  | 889.51 | K.ASLNSLR.E                                |               |
|  |  |  |  |  | 889.51 | K.ASLNSLR.E                                |               |
|  |  |  |  |  | 2670.5 | R.YALQMEQLNG<br>ILLHLESELAQTR.<br>A        |               |
|  |  |  |  |  | 2670.5 | R.YALQMEQLNG<br>ILLHLESELAQTR.<br>A        |               |

|    |       |        |          |    |        |     |                                       |                 |
|----|-------|--------|----------|----|--------|-----|---------------------------------------|-----------------|
|    |       |        |          |    | 2671.5 |     | R.YALQMEQLNG<br>ILLHLESELAQTR.<br>A   | Deamidated (NQ) |
|    |       |        |          |    | 2686.5 |     | R.YALQMEQLNG<br>ILLHLESELAQTR.<br>A   | Oxidation (M)   |
|    |       |        |          |    | 2686.5 |     | R.YALQMEQLNG<br>ILLHLESELAQTR.<br>A   | Oxidation (M)   |
|    |       |        |          |    | 1419.8 |     | R.QAQEYEALLNI<br>K.V                  |                 |
|    |       |        |          |    | 1419.8 |     | R.QAQEYEALLNI<br>K.V                  |                 |
|    |       |        |          |    | 1292.7 |     | K.VKLEAEIATYR.<br>R                   |                 |
|    |       |        |          |    | 1292.7 |     | K.VKLEAEIATYR.<br>R                   |                 |
|    |       |        |          |    | 1065.6 |     | K.LEAEIATYR.R                         |                 |
|    |       |        |          |    | 1065.6 |     | K.LEAEIATYR.R                         |                 |
|    |       |        |          |    | 2740.4 |     | R.LLEDGEDFNLG<br>DALDSSNSMQTI<br>QK.T |                 |
|    |       |        |          |    | 2740.4 |     | R.LLEDGEDFNLG<br>DALDSSNSMQTI<br>QK.T |                 |
|    |       |        |          |    |        |     |                                       |                 |
| 12 | K1C19 | P08727 | 5.00E-94 | 68 | 1554.9 | 975 | R.QSSATSSFGGL<br>GGGSVR.F             |                 |
|    |       |        |          |    | 1554.9 |     | R.QSSATSSFGGL<br>GGGSVR.F             |                 |
|    |       |        |          |    | 850.51 |     | R.FGPGVAFR.A                          |                 |
|    |       |        |          |    | 850.51 |     | R.FGPGVAFR.A                          |                 |
|    |       |        |          |    | 995.57 |     | R.APSIHGGSGGR.<br>G                   |                 |
|    |       |        |          |    | 1104.6 |     | K.LTMQNLNDR.L                         |                 |
|    |       |        |          |    | 1104.6 |     | K.LTMQNLNDR.L                         |                 |
|    |       |        |          |    | 1499.8 |     | K.VRALEAANGE                          | Deamidated (NQ) |

|  |  |  |  |  |        |                                         |                 |
|--|--|--|--|--|--------|-----------------------------------------|-----------------|
|  |  |  |  |  |        | LEVK.I                                  |                 |
|  |  |  |  |  | 1499.8 | K.VRALEAANGE<br>LEVK.I                  | Deamidated (NQ) |
|  |  |  |  |  | 1008.6 | K.IRDWYQK.Q                             |                 |
|  |  |  |  |  | 1008.6 | K.IRDWYQK.Q                             |                 |
|  |  |  |  |  | 1419.9 | R.DWYQKQGPGP<br>SR.D                    | Deamidated (NQ) |
|  |  |  |  |  | 1419.9 | R.DWYQKQGPGP<br>SR.D                    | Deamidated (NQ) |
|  |  |  |  |  | 1674.9 | R.DYSHYYTTIQD<br>LR.D                   |                 |
|  |  |  |  |  | 1674.9 | R.DYSHYYTTIQD<br>LR.D                   |                 |
|  |  |  |  |  | 1041.7 | R.IVLQIDNAR.L                           |                 |
|  |  |  |  |  | 1041.7 | R.IVLQIDNAR.L                           |                 |
|  |  |  |  |  | 807.45 | R.LAADDFR.T                             |                 |
|  |  |  |  |  | 807.45 | R.LAADDFR.T                             |                 |
|  |  |  |  |  | 1222.7 | R.TKFETEQLR.<br>M                       |                 |
|  |  |  |  |  | 1029.7 | R.VLDELTLAR.T                           |                 |
|  |  |  |  |  | 1029.7 | R.VLDELTLAR.T                           |                 |
|  |  |  |  |  | 1277.8 | R.TDLEMQIEGLK<br>.E                     | Deamidated (NQ) |
|  |  |  |  |  | 1292.8 | R.TDLEMQIEGLK<br>.E                     | Oxidation (M)   |
|  |  |  |  |  | 1292.8 | R.TDLEMQIEGLK<br>.E                     | Oxidation (M)   |
|  |  |  |  |  | 1227.7 | K.NHEEEISTLR.G                          |                 |
|  |  |  |  |  | 1227.7 | K.NHEEEISTLR.G                          |                 |
|  |  |  |  |  | 2730.5 | R.GQVGGQVSVE<br>VDSAPGTDLAKI<br>LSDMR.S | Deamidated (NQ) |
|  |  |  |  |  | 1354.7 | R.SQYEVMAEQN<br>R.K                     |                 |



|  |  |  |  |  |        |                             |                      |
|--|--|--|--|--|--------|-----------------------------|----------------------|
|  |  |  |  |  | 1354.7 | R.SQYEVMAEQN<br>R.K         |                      |
|  |  |  |  |  | 1370.7 | R.SQYEVMAEQN<br>R.K         | Oxidation (M)        |
|  |  |  |  |  | 1370.7 | R.SQYEVMAEQN<br>R.K         | Oxidation (M)        |
|  |  |  |  |  | 1210.7 | R.KDAEAWFTSR.<br>T          |                      |
|  |  |  |  |  | 1210.7 | R.KDAEAWFTSR.<br>T          |                      |
|  |  |  |  |  | 1082.6 | K.DAEAWFTSR.T               |                      |
|  |  |  |  |  | 1082.6 | K.DAEAWFTSR.T               |                      |
|  |  |  |  |  | 2231.2 | R.TEELNREVAGH<br>TEQLQMSR.S | 3 Deamidated<br>(NQ) |
|  |  |  |  |  | 1485.8 | R.EVAGHTEQLQ<br>MSR.S       |                      |
|  |  |  |  |  | 1485.8 | R.EVAGHTEQLQ<br>MSR.S       |                      |
|  |  |  |  |  | 1974.1 | R.RTLQGLEIELQ<br>SQLSMK.A   |                      |
|  |  |  |  |  | 1977.1 | R.RTLQGLEIELQ<br>SQLSMK.A   | 3 Deamidated<br>(NQ) |
|  |  |  |  |  | 1977.1 | R.RTLQGLEIELQ<br>SQLSMK.A   | 3 Deamidated<br>(NQ) |
|  |  |  |  |  | 1389.8 | K.AALEDTLAETE<br>AR.F       |                      |
|  |  |  |  |  | 1389.8 | K.AALEDTLAETE<br>AR.F       |                      |
|  |  |  |  |  | 965.53 | R.QNQEQR.L                  |                      |
|  |  |  |  |  | 965.53 | R.QNQEQR.L                  |                      |
|  |  |  |  |  | 1365.8 | K.SRLEQEIATYR.<br>S         |                      |
|  |  |  |  |  | 1122.7 | R.LEQEIATYR.S               |                      |
|  |  |  |  |  | 1122.7 | R.LEQEIATYR.S               |                      |
|  |  |  |  |  | 1905   | R.SLLEGQEDHYN               |                      |

|    |      |        |          |    |        |     |                            |                 |
|----|------|--------|----------|----|--------|-----|----------------------------|-----------------|
|    |      |        |          |    |        |     | NLSASK.V                   |                 |
|    |      |        |          |    | 1905   |     | R.SLLEGQEDHYN<br>NLSASK.V  |                 |
|    |      |        |          |    |        |     |                            |                 |
| 13 | K2C8 | P05787 | 1.20E-60 | 62 | 703.44 | 641 | K.VSTSGPR.A                |                 |
|    |      |        |          |    | 911.51 |     | R.SYTSGPGSR.I              |                 |
|    |      |        |          |    | 911.51 |     | R.SYTSGPGSR.I              |                 |
|    |      |        |          |    | 870.51 |     | R.ISSSSFSR.V               |                 |
|    |      |        |          |    | 766.46 |     | R.VGSSNFR.G                |                 |
|    |      |        |          |    | 766.46 |     | R.VGSSNFR.G                |                 |
|    |      |        |          |    | 827.5  |     | K.FASFIDK.V                |                 |
|    |      |        |          |    | 827.5  |     | K.FASFIDK.V                |                 |
|    |      |        |          |    | 906.55 |     | R.FLEQQNK.M                |                 |
|    |      |        |          |    | 1030.7 |     | K.WSLLQQQK.T               |                 |
|    |      |        |          |    | 1030.7 |     | K.WSLLQQQK.T               |                 |
|    |      |        |          |    | 1848   |     | R.SNMDNMFESYI<br>NNLR.R    |                 |
|    |      |        |          |    | 1848   |     | R.SNMDNMFESYI<br>NNLR.R    |                 |
|    |      |        |          |    | 1864   |     | R.SNMDNMFESYI<br>NNLR.R    | Oxidation (M)   |
|    |      |        |          |    | 1864   |     | R.SNMDNMFESYI<br>NNLR.R    | Oxidation (M)   |
|    |      |        |          |    | 1880   |     | R.SNMDNMFESYI<br>NNLR.R    | 2 Oxidation (M) |
|    |      |        |          |    | 1880   |     | R.SNMDNMFESYI<br>NNLR.R    | 2 Oxidation (M) |
|    |      |        |          |    | 1045.7 |     | R.QLETLGQEK.L              |                 |
|    |      |        |          |    | 2034.3 |     | K.LKLEAELGNM<br>QGLVEDFK.N |                 |
|    |      |        |          |    | 2034.3 |     | K.LKLEAELGNM<br>QGLVEDFK.N |                 |

|  |  |  |  |  |        |  |                             |                 |
|--|--|--|--|--|--------|--|-----------------------------|-----------------|
|  |  |  |  |  | 1793.1 |  | K.LEAELGNMQG<br>LVEDFK.N    |                 |
|  |  |  |  |  | 1153.7 |  | K.NKYEDEINK.R               | Deamidated (NQ) |
|  |  |  |  |  | 1066.6 |  | K.YEDEINKR.T                |                 |
|  |  |  |  |  | 1352.8 |  | R.TEMENEFVLIK.<br>K         |                 |
|  |  |  |  |  | 1352.8 |  | R.TEMENEFVLIK.<br>K         |                 |
|  |  |  |  |  | 1368.8 |  | R.TEMENEFVLIK.<br>K         | Oxidation (M)   |
|  |  |  |  |  | 1368.8 |  | R.TEMENEFVLIK.<br>K         | Oxidation (M)   |
|  |  |  |  |  | 1798   |  | K.DVDEAYMNKV<br>ELES.R.L    |                 |
|  |  |  |  |  | 1419.9 |  | R.LEGLTDEINFL<br>R.Q        |                 |
|  |  |  |  |  | 1419.9 |  | R.LEGLTDEINFL<br>R.Q        |                 |
|  |  |  |  |  | 1079.6 |  | R.QLYEEEIR.E                |                 |
|  |  |  |  |  | 1079.6 |  | R.QLYEEEIR.E                |                 |
|  |  |  |  |  | 2109.2 |  | R.ELQSQISDTSV<br>VLSMDNSR.S |                 |
|  |  |  |  |  | 2109.2 |  | R.ELQSQISDTSV<br>VLSMDNSR.S |                 |
|  |  |  |  |  | 2125.2 |  | R.ELQSQISDTSV<br>VLSMDNSR.S | Oxidation (M)   |
|  |  |  |  |  | 2125.2 |  | R.ELQSQISDTSV<br>VLSMDNSR.S |                 |
|  |  |  |  |  | 1320.8 |  | R.SLDMDSIIAEV<br>K.A        |                 |
|  |  |  |  |  | 1320.8 |  | R.SLDMDSIIAEV<br>K.A        |                 |
|  |  |  |  |  | 1412.8 |  | R.SRAEAESMYQI<br>K.Y        |                 |
|  |  |  |  |  | 1169.7 |  | R.AEAESMYQIK.<br>Y          |                 |

|  |  |  |  |  |        |  |                                                          |  |
|--|--|--|--|--|--------|--|----------------------------------------------------------|--|
|  |  |  |  |  | 1137.7 |  | K.YEELQSLAGK.<br>H                                       |  |
|  |  |  |  |  | 1137.7 |  | K.YEELQSLAGK.<br>H                                       |  |
|  |  |  |  |  | 712.4  |  | K.HGDDL.R                                                |  |
|  |  |  |  |  | 712.4  |  | K.HGDDL.R                                                |  |
|  |  |  |  |  | 868.51 |  | K.HGDDLRR.T                                              |  |
|  |  |  |  |  | 868.51 |  | K.HGDDLRR.T                                              |  |
|  |  |  |  |  | 1208.7 |  | R.TKTEISEMNR.N                                           |  |
|  |  |  |  |  | 1208.7 |  | R.TKTEISEMNR.N                                           |  |
|  |  |  |  |  | 1000.7 |  | R.LQAEIEGLK.G                                            |  |
|  |  |  |  |  | 1000.7 |  | R.LQAEIEGLK.G                                            |  |
|  |  |  |  |  | 1344.8 |  | R.ASLEAAIADAE<br>QR.G                                    |  |
|  |  |  |  |  | 1344.8 |  | R.ASLEAAIADAE<br>QR.G                                    |  |
|  |  |  |  |  | 1129.7 |  | K.LSELEAALQR.<br>A                                       |  |
|  |  |  |  |  | 1129.7 |  | K.LSELEAALQR.<br>A                                       |  |
|  |  |  |  |  | 1153.7 |  | R.EYQELMNVK.L                                            |  |
|  |  |  |  |  | 1277.8 |  | K.LALDIEIATYR.<br>K                                      |  |
|  |  |  |  |  | 1060.7 |  | R.KLEGEESR.L                                             |  |
|  |  |  |  |  | 932.55 |  | K.LLEGEESR.L                                             |  |
|  |  |  |  |  | 932.55 |  | K.LLEGEESR.L                                             |  |
|  |  |  |  |  | 3726   |  | K.TTSGYAGGLSS<br>AYGGLTSPGLSY<br>SLGSSFGSGAGSS<br>SFSR.T |  |
|  |  |  |  |  | 3726   |  | K.TTSGYAGGLSS<br>AYGGLTSPGLSY<br>SLGSSFGSGAGSS<br>SFSR.T |  |

|    |      |        |          |    |        |     |                              |                                          |
|----|------|--------|----------|----|--------|-----|------------------------------|------------------------------------------|
| 14 | LDHB | P07195 | 1.60E-22 | 37 | 1695   | 260 | K.LIAPVAEEEEAT<br>VPNNK.I    |                                          |
|    |      |        |          |    | 1695   |     | K.LIAPVAEEEEAT<br>VPNNK.I    |                                          |
|    |      |        |          |    | 913.62 |     | K.IVVVTAGVR.Q                |                                          |
|    |      |        |          |    | 913.62 |     | K.IVVVTAGVR.Q                |                                          |
|    |      |        |          |    | 833.41 |     | R.QQEGESR.L                  |                                          |
|    |      |        |          |    | 833.41 |     | R.QQEGESR.L                  |                                          |
|    |      |        |          |    | 742.48 |     | R.LNLVQR.N                   |                                          |
|    |      |        |          |    | 742.48 |     | R.LNLVQR.N                   |                                          |
|    |      |        |          |    | 720.42 |     | R.NVNVFK.F                   |                                          |
|    |      |        |          |    | 720.42 |     | R.NVNVFK.F                   |                                          |
|    |      |        |          |    | 957.64 |     | K.FIIPQIVK.Y                 |                                          |
|    |      |        |          |    | 957.64 |     | K.FIIPQIVK.Y                 |                                          |
|    |      |        |          |    | 1248.7 |     | R.VIGSGCNLDSA<br>R.F         | Carbamidomethyl<br>(C)                   |
|    |      |        |          |    | 1248.7 |     | R.VIGSGCNLDSA<br>R.F         | Carbamidomethyl<br>(C)                   |
|    |      |        |          |    | 1250.7 |     | R.VIGSGCNLDSA<br>R.F         | Carboxymethyl<br>(C); Deamidated<br>(NQ) |
|    |      |        |          |    | 1267.7 |     | K.MVVESAYEVI<br>K.L          |                                          |
|    |      |        |          |    | 1267.7 |     | K.MVVESAYEVI<br>K.L          |                                          |
|    |      |        |          |    | 2239.2 |     | K.GMYGIENEVFL<br>SLPCILNAR.G |                                          |
|    |      |        |          |    | 2239.2 |     | K.GMYGIENEVFL<br>SLPCILNAR.G |                                          |
|    |      |        |          |    | 2297.3 |     | K.GMYGIENEVFL<br>SLPCILNAR.G | Carboxymethyl<br>(C)                     |
|    |      |        |          |    | 2297.3 |     | K.GMYGIENEVFL<br>SLPCILNAR.G | Carbamidomethyl<br>(C); Deamidated       |

|    |       |        |          |    |        |     |                              |                        |
|----|-------|--------|----------|----|--------|-----|------------------------------|------------------------|
|    |       |        |          |    |        |     |                              | (NQ)                   |
|    |       |        |          |    | 1201.7 |     | R.GLTSVINQKLK.<br>D          | Deamidated (NQ)        |
|    |       |        |          |    | 1158.6 |     | K.LKDDEVAQLK.<br>K           |                        |
|    |       |        |          |    | 1158.6 |     | K.LKDDEVAQLK.<br>K           |                        |
|    |       |        |          |    | 1045.6 |     | K.DDEVAQLKK.S                |                        |
|    |       |        |          |    | 1176.6 |     | K.SADTLWDIQK.<br>D           |                        |
|    |       |        |          |    | 1176.6 |     | K.SADTLWDIQK.<br>D           |                        |
|    |       |        |          |    |        |     |                              |                        |
|    |       |        |          |    |        |     |                              |                        |
| 15 | MLRM  | P19105 | 2.00E-07 | 29 | 1237.7 | 109 | K.EAFNMIDQNR.<br>D           |                        |
|    |       |        |          |    | 1237.7 |     | K.EAFNMIDQNR.<br>D           |                        |
|    |       |        |          |    | 1253.6 |     | K.EAFNMIDQNR.<br>D           | Oxidation (M)          |
|    |       |        |          |    | 1253.6 |     | K.EAFNMIDQNR.<br>D           | Oxidation (M)          |
|    |       |        |          |    | 2350.2 |     | R.NAFACFDEEAT<br>GTIQEDYLR.E | Carbamidomethyl<br>(C) |
|    |       |        |          |    | 2350.2 |     | R.NAFACFDEEAT<br>GTIQEDYLR.E | Carbamidomethyl<br>(C) |
|    |       |        |          |    | 1415.7 |     | R.FTDEEVDELRYR<br>.E         |                        |
|    |       |        |          |    | 1415.7 |     | R.FTDEEVDELRYR<br>.E         |                        |
|    |       |        |          |    | 1260.7 |     | K.GNFNYIEFTR.I               |                        |
|    |       |        |          |    | 1260.7 |     | K.GNFNYIEFTR.I               |                        |
|    |       |        |          |    |        |     |                              |                        |
| 16 | PGAM1 | P18669 | 5.00E-89 | 64 | 1193.6 | 925 | -.MAAYKLVLR.H                | Oxidation (M)          |
|    |       |        |          |    | 1312.7 |     | R.HGESAWNLEN<br>R.F          |                        |

|  |  |  |  |  |        |                               |                        |
|--|--|--|--|--|--------|-------------------------------|------------------------|
|  |  |  |  |  | 1312.7 | R.HGESAWNLEN<br>R.F           |                        |
|  |  |  |  |  | 1980   | R.FSGWYDADLS<br>PAGHEEAK.R    |                        |
|  |  |  |  |  | 1980   | R.FSGWYDADLS<br>PAGHEEAK.R    |                        |
|  |  |  |  |  | 2136.1 | R.FSGWYDADLS<br>PAGHEEAKR.G   |                        |
|  |  |  |  |  | 757.47 | K.RGGQALR.D                   |                        |
|  |  |  |  |  | 757.47 | K.RGGQALR.D                   |                        |
|  |  |  |  |  | 1779.9 | R.DAGYEFDICFT<br>SVQK.R       | Carbamidomethyl<br>(C) |
|  |  |  |  |  | 1779.9 | R.DAGYEFDICFT<br>SVQK.R       | Carbamidomethyl<br>(C) |
|  |  |  |  |  | 1059.6 | R.HYGGTLGLNK.<br>A            |                        |
|  |  |  |  |  | 1059.6 | R.HYGGTLGLNK.<br>A            |                        |
|  |  |  |  |  | 768.43 | K.HGEAQVK.I                   |                        |
|  |  |  |  |  | 768.43 | K.HGEAQVK.I                   |                        |
|  |  |  |  |  | 2417.2 | R.SYDVPPPMEP<br>DHPFYSNISK.D  |                        |
|  |  |  |  |  | 2417.2 | R.SYDVPPPMEP<br>DHPFYSNISK.D  |                        |
|  |  |  |  |  | 2433.2 | R.SYDVPPPMEP<br>DHPFYSNISK.D  | Oxidation (M)          |
|  |  |  |  |  | 1868.9 | R.YADLTEDQLPS<br>CESLK.D      | Carbamidomethyl<br>(C) |
|  |  |  |  |  | 1868.9 | R.YADLTEDQLPS<br>CESLK.D      | Carbamidomethyl<br>(C) |
|  |  |  |  |  | 2369.3 | R.YADLTEDQLPS<br>CESLKDTIAR.A | Deamidated (NQ)        |
|  |  |  |  |  | 2369.3 | R.YADLTEDQLPS<br>CESLKDTIAR.A | Deamidated (NQ)        |
|  |  |  |  |  | 2425.3 | R.YADLTEDQLPS<br>CESLKDTIAR.A | Carbamidomethyl<br>(C) |

|    |       |        |           |    |        |      |                            |                 |
|----|-------|--------|-----------|----|--------|------|----------------------------|-----------------|
|    |       |        |           |    | 1684   |      | R.ALPFWNEEIVP<br>QIK.E     |                 |
|    |       |        |           |    | 1684   |      | R.ALPFWNEEIVP<br>QIK.E     |                 |
|    |       |        |           |    | 1150.7 |      | R.VLIAAHGNSLR.<br>G        |                 |
|    |       |        |           |    | 1150.7 |      | R.VLIAAHGNSLR.<br>G        |                 |
|    |       |        |           |    | 2115.2 |      | K.NLKPIKPMQFL<br>GDEETVR.K |                 |
|    |       |        |           |    | 2115.2 |      | K.NLKPIKPMQFL<br>GDEETVR.K |                 |
|    |       |        |           |    | 2131.2 |      | K.NLKPIKPMQFL<br>GDEETVR.K | Oxidation (M)   |
|    |       |        |           |    | 2131.2 |      | K.NLKPIKPMQFL<br>GDEETVR.K | Oxidation (M)   |
|    |       |        |           |    |        |      |                            |                 |
| 17 | PDIA1 | P07237 | 1.60E-132 | 60 | 1286.7 | 1360 | R.KSNFAEALAA<br>HK.Y       |                 |
|    |       |        |           |    | 1286.7 |      | R.KSNFAEALAA<br>HK.Y       |                 |
|    |       |        |           |    | 1158.6 |      | K.SNFAEALAAH<br>K.Y        |                 |
|    |       |        |           |    | 1158.6 |      | K.SNFAEALAAH<br>K.Y        |                 |
|    |       |        |           |    | 862.49 |      | K.ALAPEYAK.A               |                 |
|    |       |        |           |    | 1002.6 |      | K.LKAEGSEIR.L              |                 |
|    |       |        |           |    | 1002.6 |      | K.LKAEGSEIR.L              |                 |
|    |       |        |           |    | 1780.9 |      | K.VDATEESDLA<br>QQYGVR.G   |                 |
|    |       |        |           |    | 1780.9 |      | K.VDATEESDLA<br>QQYGVR.G   |                 |
|    |       |        |           |    | 1240.7 |      | K.FFRNGDTASPK<br>.E        | Deamidated (NQ) |
|    |       |        |           |    | 1240.7 |      | K.FFRNGDTASPK<br>.E        | Deamidated (NQ) |



|  |  |  |  |  |        |                                       |                        |
|--|--|--|--|--|--------|---------------------------------------|------------------------|
|  |  |  |  |  | 1202.7 | R.EADDIVNWLK.<br>K                    |                        |
|  |  |  |  |  | 1202.7 | R.EADDIVNWLK.<br>K                    |                        |
|  |  |  |  |  | 2713.5 | K.QFLQAAEAIDD<br>IPFGITSNSDVFSK<br>.Y |                        |
|  |  |  |  |  | 1424.8 | K.YQLDKDGVVL<br>FK.K                  |                        |
|  |  |  |  |  | 1424.8 | K.YQLDKDGVVL<br>FK.K                  |                        |
|  |  |  |  |  | 751.41 | K.KFDEGR.N                            |                        |
|  |  |  |  |  | 751.41 | K.KFDEGR.N                            |                        |
|  |  |  |  |  | 1642.8 | K.FDEGRNNFEGE<br>VTK.E                | Deamidated (NQ)        |
|  |  |  |  |  | 1037.6 | R.NNFEGEVTK.E                         |                        |
|  |  |  |  |  | 1965.1 | K.HNQLPLVIEFT<br>EQTAPK.I             |                        |
|  |  |  |  |  | 1965.1 | K.HNQLPLVIEFT<br>EQTAPK.I             |                        |
|  |  |  |  |  | 763.45 | K.IFGGEIK.T                           |                        |
|  |  |  |  |  | 1081.7 | K.THILLFLPK.S                         |                        |
|  |  |  |  |  | 1081.7 | K.THILLFLPK.S                         |                        |
|  |  |  |  |  | 1460.8 | K.SVSDYDGKLS<br>NFK.T                 | Deamidated (NQ)        |
|  |  |  |  |  | 1460.8 | K.SVSDYDGKLS<br>NFK.T                 | Deamidated (NQ)        |
|  |  |  |  |  | 1834   | K.ILFIFIDSDHTD<br>NQR.I               |                        |
|  |  |  |  |  | 1834   | K.ILFIFIDSDHTD<br>NQR.I               |                        |
|  |  |  |  |  | 966.61 | R.ILEFFGLK.K                          |                        |
|  |  |  |  |  | 988.55 | K.KEECPAVR.L                          | Carbamidomethyl<br>(C) |
|  |  |  |  |  | 988.55 | K.KEECPAVR.L                          | Carbamidomethyl        |

|  |  |  |  |        |  |                              |                        |
|--|--|--|--|--------|--|------------------------------|------------------------|
|  |  |  |  |        |  |                              | (C)                    |
|  |  |  |  | 1451.8 |  | K.YKPESEELTAE<br>R.I         |                        |
|  |  |  |  | 1451.8 |  | K.YKPESEELTAE<br>R.I         |                        |
|  |  |  |  | 962.5  |  | R.ITEFCHR.F                  | Carbamidomethyl<br>(C) |
|  |  |  |  | 962.5  |  | R.ITEFCHR.F                  | Carbamidomethyl<br>(C) |
|  |  |  |  | 2418.4 |  | K.IKPHLMSQELP<br>EDWDKQPVK.V |                        |
|  |  |  |  | 2418.4 |  | K.IKPHLMSQELP<br>EDWDKQPVK.V |                        |
|  |  |  |  | 2434.4 |  | K.IKPHLMSQELP<br>EDWDKQPVK.V | Oxidation (M)          |
|  |  |  |  | 2434.4 |  | K.IKPHLMSQELP<br>EDWDKQPVK.V | Oxidation (M)          |
|  |  |  |  | 1213.6 |  | K.NFEDVAFDEK.<br>K           |                        |
|  |  |  |  | 1213.6 |  | K.NFEDVAFDEK.<br>K           |                        |
|  |  |  |  | 1927.9 |  | K.KNVFEFYAP<br>WCGHCK.Q      |                        |
|  |  |  |  | 970.57 |  | K.QLAPIWDK.L                 |                        |
|  |  |  |  | 1730   |  | K.LGETYKDHENI<br>VIAK.M      |                        |
|  |  |  |  | 1730   |  | K.LGETYKDHENI<br>VIAK.M      |                        |
|  |  |  |  | 928.56 |  | K.VHSFPTLK.F                 |                        |
|  |  |  |  | 928.56 |  | K.VHSFPTLK.F                 |                        |
|  |  |  |  | 910.49 |  | K.FFPASADR.T                 |                        |
|  |  |  |  | 910.49 |  | K.FFPASADR.T                 |                        |
|  |  |  |  | 1066.6 |  | R.TVIDYNGER.T                |                        |
|  |  |  |  |        |  |                              |                        |

|    |       |        |          |    |        |     |                                  |                                    |
|----|-------|--------|----------|----|--------|-----|----------------------------------|------------------------------------|
| 18 | PARK7 | Q99497 | 7.90E-41 | 71 | 2384.1 | 443 | R.ALVILAKGAEEMETVIPVDVMR.R       |                                    |
|    |       |        |          |    | 1675.9 |     | K.GAEEMETVIPVDVMR.R              |                                    |
|    |       |        |          |    | 1675.9 |     | K.GAEEMETVIPVDVMR.R              |                                    |
|    |       |        |          |    | 1691.9 |     | K.GAEEMETVIPVDVMR.R              | Oxidation (M)                      |
|    |       |        |          |    | 1691.9 |     | K.GAEEMETVIPVDVMR.R              | Oxidation (M)                      |
|    |       |        |          |    | 1707.9 |     | K.GAEEMETVIPVDVMR.R              | 2 Oxidation (M)                    |
|    |       |        |          |    | 1658   |     | K.VTVAGLAGKDPVQCSR.D             | Carbamidomethyl (C)                |
|    |       |        |          |    | 1659.9 |     | K.VTVAGLAGKDPVQCSR.D             | Carboxymethyl (C); Deamidated (NQ) |
|    |       |        |          |    | 861.43 |     | K.DPVQCSR.D                      | Carbamidomethyl (C)                |
|    |       |        |          |    | 861.43 |     | K.DPVQCSR.D                      | Carbamidomethyl (C)                |
|    |       |        |          |    | 2261.3 |     | K.DPVQSRDVI CPDASLEDAK.K         | Deamidated (NQ)                    |
|    |       |        |          |    | 1531.8 |     | R.DVVICPDASLEDAK.K               | Carbamidomethyl (C)                |
|    |       |        |          |    | 1531.8 |     | R.DVVICPDASLEDAK.K               | Carbamidomethyl (C)                |
|    |       |        |          |    | 1659.9 |     | R.DVVICPDASLEDAK.E               | Carbamidomethyl (C)                |
|    |       |        |          |    | 2584.5 |     | K.EGPYDVVVLP GGNLGAQNLSES AAVK.E |                                    |
|    |       |        |          |    | 2584.5 |     | K.EGPYDVVVLP GGNLGAQNLSES AAVK.E |                                    |
|    |       |        |          |    | 2267.3 |     | K.GLIAAICAGPT ALLAHEIGFGSK.V     | Carbamidomethyl (C)                |

|    |      |        |          |    |        |     |                                     |                                          |
|----|------|--------|----------|----|--------|-----|-------------------------------------|------------------------------------------|
|    |      |        |          |    | 2267.3 |     | K.GLIAAICAGPT<br>ALLAHEIGFGSK.<br>V | Carbamidomethyl<br>(C)                   |
|    |      |        |          |    | 1835.8 |     | K.DKMMNGGHY<br>TYSENR.V             | Deamidated (NQ);<br>2 Oxidation (M)      |
|    |      |        |          |    | 1835.8 |     | K.DKMMNGGHY<br>TYSENR.V             | Deamidated (NQ);<br>2 Oxidation (M)      |
|    |      |        |          |    | 1559.7 |     | K.MMNGGHYTYS<br>ENR.V               |                                          |
|    |      |        |          |    | 1560.7 |     | K.MMNGGHYTYS<br>ENR.V               | Deamidated (NQ)                          |
|    |      |        |          |    | 1560.7 |     | K.MMNGGHYTYS<br>ENR.V               | Deamidated (NQ)                          |
|    |      |        |          |    | 1575.7 |     | K.MMNGGHYTYS<br>ENR.V               | Oxidation (M)                            |
|    |      |        |          |    | 1576.7 |     | K.MMNGGHYTYS<br>ENR.V               | Deamidated (NQ);<br>Oxidation (M)        |
|    |      |        |          |    | 1576.7 |     | K.MMNGGHYTYS<br>ENR.V               | Deamidated (NQ);<br>Oxidation (M)        |
|    |      |        |          |    | 1592.7 |     | K.MMNGGHYTYS<br>ENR.V               | Deamidated (NQ);<br>2 Oxidation (M)      |
|    |      |        |          |    | 1592.7 |     | K.MMNGGHYTYS<br>ENR.V               | Deamidated (NQ);<br>2 Oxidation (M)      |
|    |      |        |          |    | 1921.1 |     | R.GPGTSFEFALAI<br>VEALNGK.E         |                                          |
|    |      |        |          |    | 1921.1 |     | R.GPGTSFEFALAI<br>VEALNGK.E         |                                          |
| 19 | KPYM | P14618 | 1.60E-94 | 55 | 1197.7 | 980 | R.LDIDSPITAR.N                      |                                          |
|    |      |        |          |    | 1197.7 |     | R.LDIDSPITAR.N                      |                                          |
|    |      |        |          |    | 1359.8 |     | R.NTGICTIGPAS<br>R.S                | Carbamidomethyl<br>(C)                   |
|    |      |        |          |    | 1359.8 |     | R.NTGICTIGPAS<br>R.S                | Carbamidomethyl<br>(C)                   |
|    |      |        |          |    | 2019.3 |     | R.NTGICTIGPAS<br>RSVETLK.E          | Carboxymethyl<br>(C); Deamidated<br>(NQ) |

|  |  |  |  |  |        |                                     |                        |
|--|--|--|--|--|--------|-------------------------------------|------------------------|
|  |  |  |  |  | 1884   | R.LNFSHGTHEYH<br>AETIK.N            |                        |
|  |  |  |  |  | 1884   | R.LNFSHGTHEYH<br>AETIK.N            |                        |
|  |  |  |  |  | 2465.5 | R.TATESFASDPIL<br>YRPVAVALDTK.<br>G |                        |
|  |  |  |  |  | 2465.5 | R.TATESFASDPIL<br>YRPVAVALDTK.<br>G |                        |
|  |  |  |  |  | 1468.8 | K.CDENILWLDY<br>K.N                 | Carbamidomethyl<br>(C) |
|  |  |  |  |  | 1468.8 | K.CDENILWLDY<br>K.N                 | Carbamidomethyl<br>(C) |
|  |  |  |  |  | 1462.9 | K.IYVDDGLISLQ<br>VK.Q               |                        |
|  |  |  |  |  | 1780   | K.GADFLVTEVE<br>NGGSLGSK.K          |                        |
|  |  |  |  |  | 1781   | K.GADFLVTEVE<br>NGGSLGSK.K          | Deamidated (NQ)        |
|  |  |  |  |  | 1781   | K.GADFLVTEVE<br>NGGSLGSK.K          | Deamidated (NQ)        |
|  |  |  |  |  | 1860   | K.FGVEQDVMV<br>FASFIR.K             |                        |
|  |  |  |  |  | 1040.6 | R.KASDVHEVR.K                       |                        |
|  |  |  |  |  | 912.51 | K.ASDVHEVR.K                        |                        |
|  |  |  |  |  | 912.51 | K.ASDVHEVR.K                        |                        |
|  |  |  |  |  | 1040.6 | K.ASDVHEVRK.V                       |                        |
|  |  |  |  |  | 953.54 | K.IENHEGVR.R                        |                        |
|  |  |  |  |  | 953.54 | K.IENHEGVR.R                        |                        |
|  |  |  |  |  | 1822.1 | R.RFDEILEASDGI<br>MVAR.G            |                        |
|  |  |  |  |  | 1822.1 | R.RFDEILEASDGI<br>MVAR.G            |                        |
|  |  |  |  |  | 1838   | R.RFDEILEASDGI<br>MVAR.G            | Oxidation (M)          |

|  |  |  |  |  |        |                                |                                          |
|--|--|--|--|--|--------|--------------------------------|------------------------------------------|
|  |  |  |  |  | 1838   | R.RFDEILEASDGI<br>MVAR.G       | Oxidation (M)                            |
|  |  |  |  |  | 2211.3 | R.CNRAGKPVICA<br>TQMLESNIK.K   | 2 Deamidated<br>(NQ); Oxidation<br>(M)   |
|  |  |  |  |  | 2225.3 | R.CNRAGKPVICA<br>TQMLESNIK.K   | 2 Oxidation (M)                          |
|  |  |  |  |  | 2225.3 | R.CNRAGKPVICA<br>TQMLESNIK.K   | 2 Oxidation (M)                          |
|  |  |  |  |  | 2283.3 | R.CNRAGKPVICA<br>TQMLESNIK.K   | Carboxymethyl<br>(C); 2 Oxidation<br>(M) |
|  |  |  |  |  | 1019.6 | K.GDYPLEAVR.M                  |                                          |
|  |  |  |  |  | 1019.6 | K.GDYPLEAVR.M                  |                                          |
|  |  |  |  |  | 868.53 | R.MQHLIAR.E                    |                                          |
|  |  |  |  |  | 868.53 | R.MQHLIAR.E                    |                                          |
|  |  |  |  |  | 884.52 | R.MQHLIAR.E                    | Oxidation (M)                            |
|  |  |  |  |  | 884.52 | R.MQHLIAR.E                    | Oxidation (M)                            |
|  |  |  |  |  | 1932.1 | R.EAEAAIYHLQL<br>FEELR.R       |                                          |
|  |  |  |  |  | 1932.1 | R.EAEAAIYHLQL<br>FEELR.R       |                                          |
|  |  |  |  |  | 2175.3 | R.LAPITSDPTEAT<br>AVGAVEASFK.C |                                          |
|  |  |  |  |  | 2175.3 | R.LAPITSDPTEAT<br>AVGAVEASFK.C |                                          |
|  |  |  |  |  | 1165.7 | K.CCSGAIIVLTK.<br>S            | Carboxymethyl<br>(C)                     |
|  |  |  |  |  | 768.45 | R.SAHQVAR.Y                    |                                          |
|  |  |  |  |  | 768.45 | R.SAHQVAR.Y                    |                                          |
|  |  |  |  |  | 840.58 | R.APIIAVTR.N                   |                                          |
|  |  |  |  |  | 840.58 | R.APIIAVTR.N                   |                                          |
|  |  |  |  |  | 1456.9 | R.NPQTARQAHL<br>YR.G           | 2 Deamidated<br>(NQ)                     |

|    |       |        |          |    |        |      |                              |                        |
|----|-------|--------|----------|----|--------|------|------------------------------|------------------------|
|    |       |        |          |    | 1456.9 |      | R.NPQTARQAHL<br>YR.G         | 2 Deamidated<br>(NQ)   |
|    |       |        |          |    | 787.46 |      | R.QAHL YR.G                  |                        |
|    |       |        |          |    | 787.46 |      | R.QAHL YR.G                  |                        |
|    |       |        |          |    | 1645.9 |      | R.QAHL YRGIFPV<br>LCK.D      | Deamidated (NQ)        |
|    |       |        |          |    | 1642.9 |      | K.DPVQEAWAED<br>VDLR.V       |                        |
|    |       |        |          |    | 1642.9 |      | K.DPVQEAWAED<br>VDLR.V       |                        |
|    |       |        |          |    |        |      |                              |                        |
| 20 | AL1A1 | P00352 | 1.60E-96 | 38 | 2283.2 | 1000 | K.FPVFNPAEEEE<br>LCQVEEGDK.E | 2 Deamidated<br>(NQ)   |
|    |       |        |          |    | 1189.6 |      | R.QAFQIGSPWR.T               |                        |
|    |       |        |          |    | 1189.6 |      | R.QAFQIGSPWR.T               |                        |
|    |       |        |          |    | 829.49 |      | K.LADLIER.D                  |                        |
|    |       |        |          |    | 829.49 |      | K.LADLIER.D                  |                        |
|    |       |        |          |    | 1365.7 |      | R.LLLATMESMN<br>GGK.L        | Deamidated (NQ)        |
|    |       |        |          |    | 1714.9 |      | K.LYSNAYLNDL<br>AGCIK.T      | Carbamidomethyl<br>(C) |
|    |       |        |          |    | 1714.9 |      | K.LYSNAYLNDL<br>AGCIK.T      | Carbamidomethyl<br>(C) |
|    |       |        |          |    | 970.43 |      | R.YCAGWADK.I                 | Carbamidomethyl<br>(C) |
|    |       |        |          |    | 970.43 |      | R.YCAGWADK.I                 | Carbamidomethyl<br>(C) |
|    |       |        |          |    | 1544.8 |      | R.TIPIDGNFFTYT<br>R.H        |                        |
|    |       |        |          |    | 1544.8 |      | R.TIPIDGNFFTYT<br>R.H        |                        |
|    |       |        |          |    | 1645.9 |      | R.IFVEESIYDEFV<br>R.R        |                        |
|    |       |        |          |    | 1645.9 |      | R.IFVEESIYDEFV<br>R.R        |                        |

|  |  |  |  |  |        |  |                                      |                        |
|--|--|--|--|--|--------|--|--------------------------------------|------------------------|
|  |  |  |  |  | 2674.4 |  | K.YILGNPLTPGV<br>TQGPQIDKEQYD<br>K.I |                        |
|  |  |  |  |  | 2674.4 |  | K.YILGNPLTPGV<br>TQGPQIDKEQYD<br>K.I |                        |
|  |  |  |  |  | 1117.6 |  | K.LECGGGPWGN<br>K.G                  |                        |
|  |  |  |  |  | 1117.6 |  | K.LECGGGPWGN<br>K.G                  |                        |
|  |  |  |  |  | 1174.6 |  | K.LECGGGPWGN<br>K.G                  | Carbamidomethyl<br>(C) |
|  |  |  |  |  | 1174.6 |  | K.LECGGGPWGN<br>K.G                  | Carbamidomethyl<br>(C) |
|  |  |  |  |  | 1990   |  | K.GYFVQPTVFSN<br>VTDEMR.I            |                        |
|  |  |  |  |  | 1990   |  | K.GYFVQPTVFSN<br>VTDEMR.I            |                        |
|  |  |  |  |  | 2006   |  | K.GYFVQPTVFSN<br>VTDEMR.I            | Oxidation (M)          |
|  |  |  |  |  | 2006   |  | K.GYFVQPTVFSN<br>VTDEMR.I            | Oxidation (M)          |
|  |  |  |  |  | 1731.9 |  | R.IAKEEIFGPVQQ<br>IMK.F              | Deamidated (NQ)        |
|  |  |  |  |  | 1418.8 |  | K.EEIFGPVQQIM<br>K.F                 |                        |
|  |  |  |  |  | 1418.8 |  | K.EEIFGPVQQIM<br>K.F                 |                        |
|  |  |  |  |  | 1434.8 |  | K.EEIFGPVQQIM<br>K.F                 | Oxidation (M)          |
|  |  |  |  |  | 1589.8 |  | R.ANNTFYGLSA<br>GVFTK.D              |                        |
|  |  |  |  |  | 1589.8 |  | R.ANNTFYGLSA<br>GVFTK.D              |                        |
|  |  |  |  |  | 1700.8 |  | R.ELGEYGFHEYT<br>EVK.T               |                        |
|  |  |  |  |  | 1700.8 |  | R.ELGEYGFHEYT<br>EVK.T               |                        |



|    |       |        |          |    |        |     |                                                    |                                          |
|----|-------|--------|----------|----|--------|-----|----------------------------------------------------|------------------------------------------|
| 21 | AL1A1 | P00352 | 2.00E-96 | 49 | 1189.7 | 999 | R.QAFQIGSPWR.T                                     |                                          |
|    |       |        |          |    | 1189.7 |     | R.QAFQIGSPWR.T                                     |                                          |
|    |       |        |          |    | 829.51 |     | K.LADLIER.D                                        |                                          |
|    |       |        |          |    | 1365.7 |     | R.LLLATMESMN<br>GGK.L                              | Deamidated (NQ)                          |
|    |       |        |          |    | 1714.9 |     | K.LYSNAYLNLDL<br>AGCIK.T                           | Carbamidomethyl<br>(C)                   |
|    |       |        |          |    | 1714.9 |     | K.LYSNAYLNLDL<br>AGCIK.T                           | Carbamidomethyl<br>(C)                   |
|    |       |        |          |    | 1716.9 |     | K.LYSNAYLNLDL<br>AGCIK.T                           | Carboxymethyl<br>(C); Deamidated<br>(NQ) |
|    |       |        |          |    | 970.45 |     | R.YCAGWADK.I                                       | Carbamidomethyl<br>(C)                   |
|    |       |        |          |    | 970.45 |     | R.YCAGWADK.I                                       | Carbamidomethyl<br>(C)                   |
|    |       |        |          |    | 1544.9 |     | R.TIPIDGNFFTYT<br>R.H                              |                                          |
|    |       |        |          |    | 1544.9 |     | R.TIPIDGNFFTYT<br>R.H                              |                                          |
|    |       |        |          |    | 3067.7 |     | K.EAGFPPGVVNI<br>VPGYGPTAGAAI<br>SSHMDIDK.V        |                                          |
|    |       |        |          |    | 829.51 |     | K.LIKEAAGK.S                                       |                                          |
|    |       |        |          |    | 3929   |     | K.SPCIVLADADL<br>DNAVEFAHHGVF<br>YHQGCCIAASR.<br>I | 3<br>Carbamidomethyl<br>(C)              |
|    |       |        |          |    | 3929   |     | K.SPCIVLADADL<br>DNAVEFAHHGVF<br>YHQGCCIAASR.<br>I | 3<br>Carbamidomethyl<br>(C)              |
|    |       |        |          |    | 1645.9 |     | R.IFVEESYDEFV<br>R.R                               |                                          |
|    |       |        |          |    | 1645.9 |     | R.IFVEESYDEFV<br>R.R                               |                                          |
|    |       |        |          |    | 2674.5 |     | K.YILGNPLTPGV                                      |                                          |

|    |       |        |          |    |        |      |                                      |                        |
|----|-------|--------|----------|----|--------|------|--------------------------------------|------------------------|
|    |       |        |          |    |        |      | TQGPQIDKEQYD<br>K.I                  |                        |
|    |       |        |          |    | 2674.5 |      | K.YILGNPLTPGV<br>TQGPQIDKEQYD<br>K.I |                        |
|    |       |        |          |    | 1174.6 |      | K.LECGGPPWGN<br>K.G                  | Carbamidomethyl<br>(C) |
|    |       |        |          |    | 1174.6 |      | K.LECGGPPWGN<br>K.G                  | Carbamidomethyl<br>(C) |
|    |       |        |          |    | 1990.1 |      | K.GYFVQPTVFSN<br>VTDEMR.I            |                        |
|    |       |        |          |    | 1990.1 |      | K.GYFVQPTVFSN<br>VTDEMR.I            |                        |
|    |       |        |          |    | 2006   |      | K.GYFVQPTVFSN<br>VTDEMR.I            | Oxidation (M)          |
|    |       |        |          |    | 2006   |      | K.GYFVQPTVFSN<br>VTDEMR.I            | Oxidation (M)          |
|    |       |        |          |    | 1731.9 |      | R.IAKEEIFGPVQQ<br>IMK.F              | Deamidated (NQ)        |
|    |       |        |          |    | 1731.9 |      | R.IAKEEIFGPVQQ<br>IMK.F              | Deamidated (NQ)        |
|    |       |        |          |    | 1418.8 |      | K.EEIFGPVQQIM<br>K.F                 |                        |
|    |       |        |          |    | 1418.8 |      | K.EEIFGPVQQIM<br>K.F                 |                        |
|    |       |        |          |    | 1434.8 |      | K.EEIFGPVQQIM<br>K.F                 | Oxidation (M)          |
|    |       |        |          |    | 1589.9 |      | R.ANNTFYGLSA<br>GVFTK.D              |                        |
|    |       |        |          |    | 1589.9 |      | R.ANNTFYGLSA<br>GVFTK.D              |                        |
|    |       |        |          |    | 1700.9 |      | R.ELGEYGFHEYT<br>EVK.T               |                        |
|    |       |        |          |    | 1700.9 |      | R.ELGEYGFHEYT<br>EVK.T               |                        |
| 22 | AL1A1 | P00352 | 1.60E-97 | 41 | 2283.3 | 1010 | K.FPVFNPAEEEE<br>LCQVEEGDK.E         | 2 Deamidated<br>(NQ)   |

|  |  |  |  |  |        |  |                                      |                        |
|--|--|--|--|--|--------|--|--------------------------------------|------------------------|
|  |  |  |  |  | 1189.7 |  | R.QAFQIGSPWR.T                       |                        |
|  |  |  |  |  | 1189.7 |  | R.QAFQIGSPWR.T                       |                        |
|  |  |  |  |  | 809.39 |  | R.TMDASER.G                          |                        |
|  |  |  |  |  | 829.52 |  | K.LADLIER.D                          |                        |
|  |  |  |  |  | 1365.7 |  | R.LLLATMESMN<br>GGK.L                | Deamidated (NQ)        |
|  |  |  |  |  | 1659.9 |  | K.LYSNAYLNDL<br>AGCIK.T              | 2 Deamidated<br>(NQ)   |
|  |  |  |  |  | 1714.9 |  | K.LYSNAYLNDL<br>AGCIK.T              | Carbamidomethyl<br>(C) |
|  |  |  |  |  | 1714.9 |  | K.LYSNAYLNDL<br>AGCIK.T              | Carbamidomethyl<br>(C) |
|  |  |  |  |  | 970.46 |  | R.YCAGWADK.I                         | Carbamidomethyl<br>(C) |
|  |  |  |  |  | 970.46 |  | R.YCAGWADK.I                         | Carbamidomethyl<br>(C) |
|  |  |  |  |  | 1544.9 |  | R.TIPIDGNFFTYT<br>R.H                |                        |
|  |  |  |  |  | 1544.9 |  | R.TIPIDGNFFTYT<br>R.H                |                        |
|  |  |  |  |  | 829.52 |  | K.LIKEAAGK.S                         |                        |
|  |  |  |  |  | 1645.9 |  | R.IFVEESYDEFV<br>R.R                 |                        |
|  |  |  |  |  | 1645.9 |  | R.IFVEESYDEFV<br>R.R                 |                        |
|  |  |  |  |  | 2674.5 |  | K.YILGNPLTPGV<br>TQGPQIDKEQYD<br>K.I |                        |
|  |  |  |  |  | 2674.5 |  | K.YILGNPLTPGV<br>TQGPQIDKEQYD<br>K.I |                        |
|  |  |  |  |  | 1174.6 |  | K.LECGGPPWGN<br>K.G                  | Carbamidomethyl<br>(C) |
|  |  |  |  |  | 1174.6 |  | K.LECGGPPWGN<br>K.G                  | Carbamidomethyl<br>(C) |
|  |  |  |  |  | 1990.1 |  | K.GYFVQPTVFSN                        |                        |

|    |      |        |          |    |        |     |                           |               |
|----|------|--------|----------|----|--------|-----|---------------------------|---------------|
|    |      |        |          |    |        |     | VTDEMR.I                  |               |
|    |      |        |          |    | 1990.1 |     | K.GYFVQPTVFSN<br>VTDEMR.I |               |
|    |      |        |          |    | 2006   |     | K.GYFVQPTVFSN<br>VTDEMR.I | Oxidation (M) |
|    |      |        |          |    | 2006   |     | K.GYFVQPTVFSN<br>VTDEMR.I | Oxidation (M) |
|    |      |        |          |    | 1731   |     | R.IAKEEIFGPVQQ<br>IMK.F   |               |
|    |      |        |          |    | 1731   |     | R.IAKEEIFGPVQQ<br>IMK.F   |               |
|    |      |        |          |    | 1418.8 |     | K.EEIFGPVQQIM<br>K.F      |               |
|    |      |        |          |    | 1418.8 |     | K.EEIFGPVQQIM<br>K.F      |               |
|    |      |        |          |    | 1434.8 |     | K.EEIFGPVQQIM<br>K.F      | Oxidation (M) |
|    |      |        |          |    | 1589.9 |     | R.ANNTFYGLSA<br>GVFTK.D   |               |
|    |      |        |          |    | 1589.9 |     | R.ANNTFYGLSA<br>GVFTK.D   |               |
|    |      |        |          |    | 1700.9 |     | R.ELGEYGFHEYT<br>EVK.T    |               |
|    |      |        |          |    | 1700.9 |     | R.ELGEYGFHEYT<br>EVK.T    |               |
|    |      |        |          |    |        |     |                           |               |
| 23 | GDIR | P52565 | 3.10E-45 | 40 | 1918   | 487 | K.SIQEIQELDKD<br>DESLR.K  |               |
|    |      |        |          |    | 1918   |     | K.SIQEIQELDKD<br>DESLR.K  |               |
|    |      |        |          |    | 721.43 |     | K.QSFVLK.E                |               |
|    |      |        |          |    | 721.43 |     | K.QSFVLK.E                |               |
|    |      |        |          |    | 752.39 |     | K.EGVEYR.I                |               |
|    |      |        |          |    | 752.39 |     | K.EGVEYR.I                |               |
|    |      |        |          |    | 980.54 |     | K.YIQHTYR.K               |               |

|    |      |        |          |    |        |     |                             |                        |
|----|------|--------|----------|----|--------|-----|-----------------------------|------------------------|
|    |      |        |          |    | 980.54 |     | K.YIQHTYR.K                 |                        |
|    |      |        |          |    | 1601.8 |     | K.IDKTDYMVGS<br>YGPR.A      |                        |
|    |      |        |          |    | 1601.8 |     | K.IDKTDYMVGS<br>YGPR.A      |                        |
|    |      |        |          |    | 1617.8 |     | K.IDKTDYMVGS<br>YGPR.A      | Oxidation (M)          |
|    |      |        |          |    | 1617.8 |     | K.IDKTDYMVGS<br>YGPR.A      | Oxidation (M)          |
|    |      |        |          |    | 1245.6 |     | K.TDYMVGSYGP<br>R.A         |                        |
|    |      |        |          |    | 1245.6 |     | K.TDYMVGSYGP<br>R.A         |                        |
|    |      |        |          |    | 1261.6 |     | K.TDYMVGSYGP<br>R.A         | Oxidation (M)          |
|    |      |        |          |    | 1261.6 |     | K.TDYMVGSYGP<br>R.A         | Oxidation (M)          |
|    |      |        |          |    | 1751.9 |     | R.AEEYEFLTPVE<br>EAPK.G     |                        |
|    |      |        |          |    | 1751.9 |     | R.AEEYEFLTPVE<br>EAPK.G     |                        |
|    |      |        |          |    | 2364.2 |     | R.FTDDDKTDHLS<br>WEWNLTIK.K |                        |
|    |      |        |          |    | 2364.2 |     | R.FTDDDKTDHLS<br>WEWNLTIK.K |                        |
|    |      |        |          |    |        |     |                             |                        |
| 24 | TBCB | Q99426 | 3.90E-19 | 39 | 2023   | 226 | K.LDQEDALLGS<br>YPVDDGCR.I  | Carbamidomethyl<br>(C) |
|    |      |        |          |    | 2023   |     | K.LDQEDALLGS<br>YPVDDGCR.I  | Carbamidomethyl<br>(C) |
|    |      |        |          |    | 1104.7 |     | R.IHVIDHSGAR.L              |                        |
|    |      |        |          |    | 1104.7 |     | R.IHVIDHSGAR.L              |                        |
|    |      |        |          |    | 1067.6 |     | R.LGEYEDVSR.V               |                        |
|    |      |        |          |    | 1067.6 |     | R.LGEYEDVSR.V               |                        |
|    |      |        |          |    | 1373.7 |     | K.YTISQEAYDQR               |                        |

|  |  |  |  |  |        |                     |                                            |
|--|--|--|--|--|--------|---------------------|--------------------------------------------|
|  |  |  |  |  |        | .Q                  |                                            |
|  |  |  |  |  | 1165.7 | K.LGRYNEEER.A       |                                            |
|  |  |  |  |  | 839.41 | R.YNEEER.A          |                                            |
|  |  |  |  |  | 839.41 | R.YNEEER.A          |                                            |
|  |  |  |  |  | 1101.6 | R.AQQEAEAAQR.<br>L  |                                            |
|  |  |  |  |  | 1072.6 | K.AQASSIPVGSR.<br>C |                                            |
|  |  |  |  |  | 1231.7 | R.CEVRAAGQSPR<br>.R | Carbamidomethyl<br>(C); Deamidated<br>(NQ) |
|  |  |  |  |  | 1231.7 | R.CEVRAAGQSPR<br>.R | Carboxymethyl<br>(C)                       |
|  |  |  |  |  | 842.56 | R.AAGQSPRR.G        |                                            |
|  |  |  |  |  | 945.47 | R.YFECQAK.Y         | Carbamidomethyl<br>(C)                     |
|  |  |  |  |  | 945.47 | R.YFECQAK.Y         | Carbamidomethyl<br>(C)                     |

## Supplementary Figures

### Supplementary Figure 1

The top five networks identified in IPA analysis of differentially expressed genes after DAMTC treatment in A549 cells

# Network 1

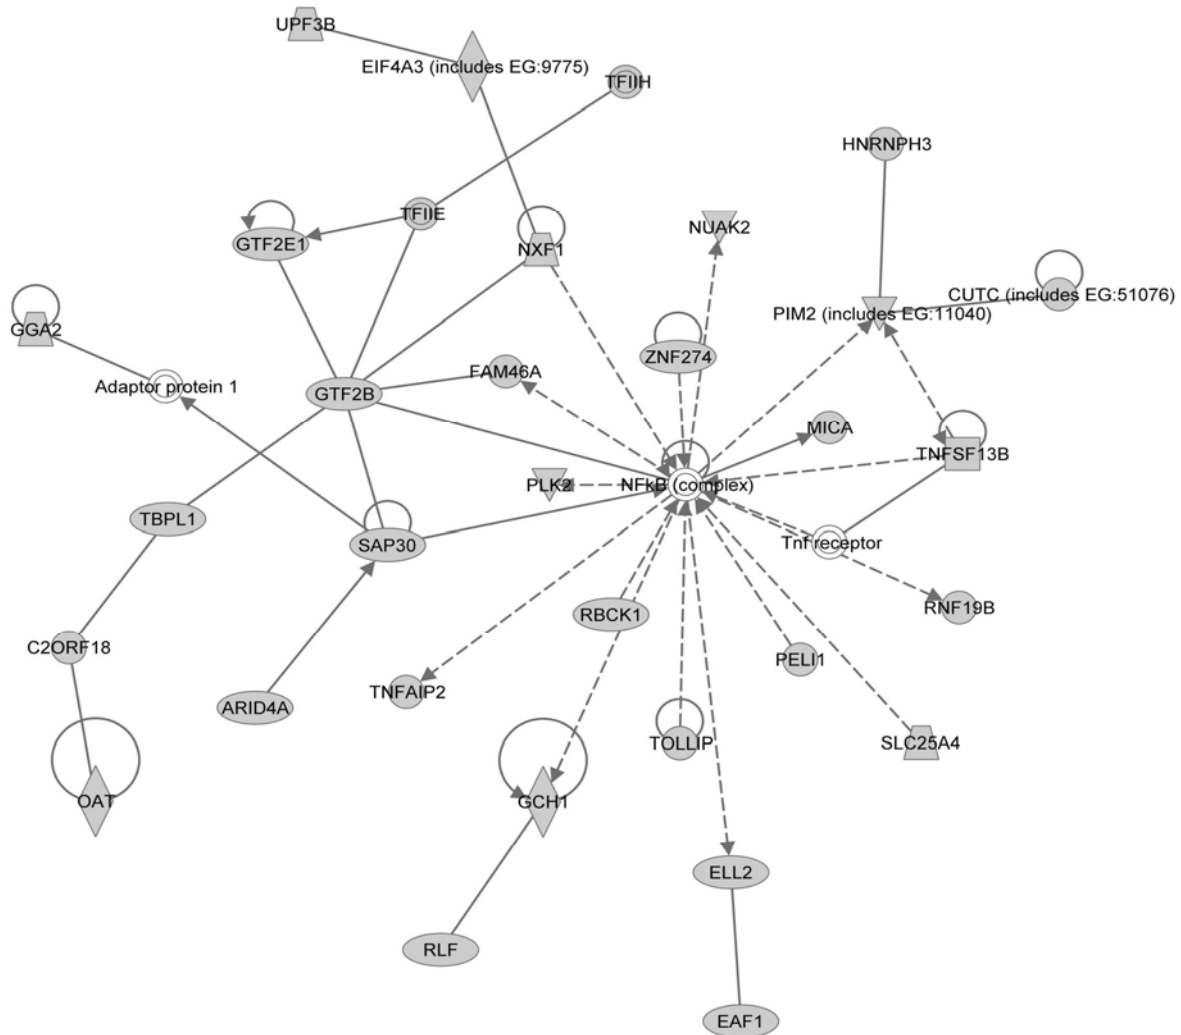





### Network 3

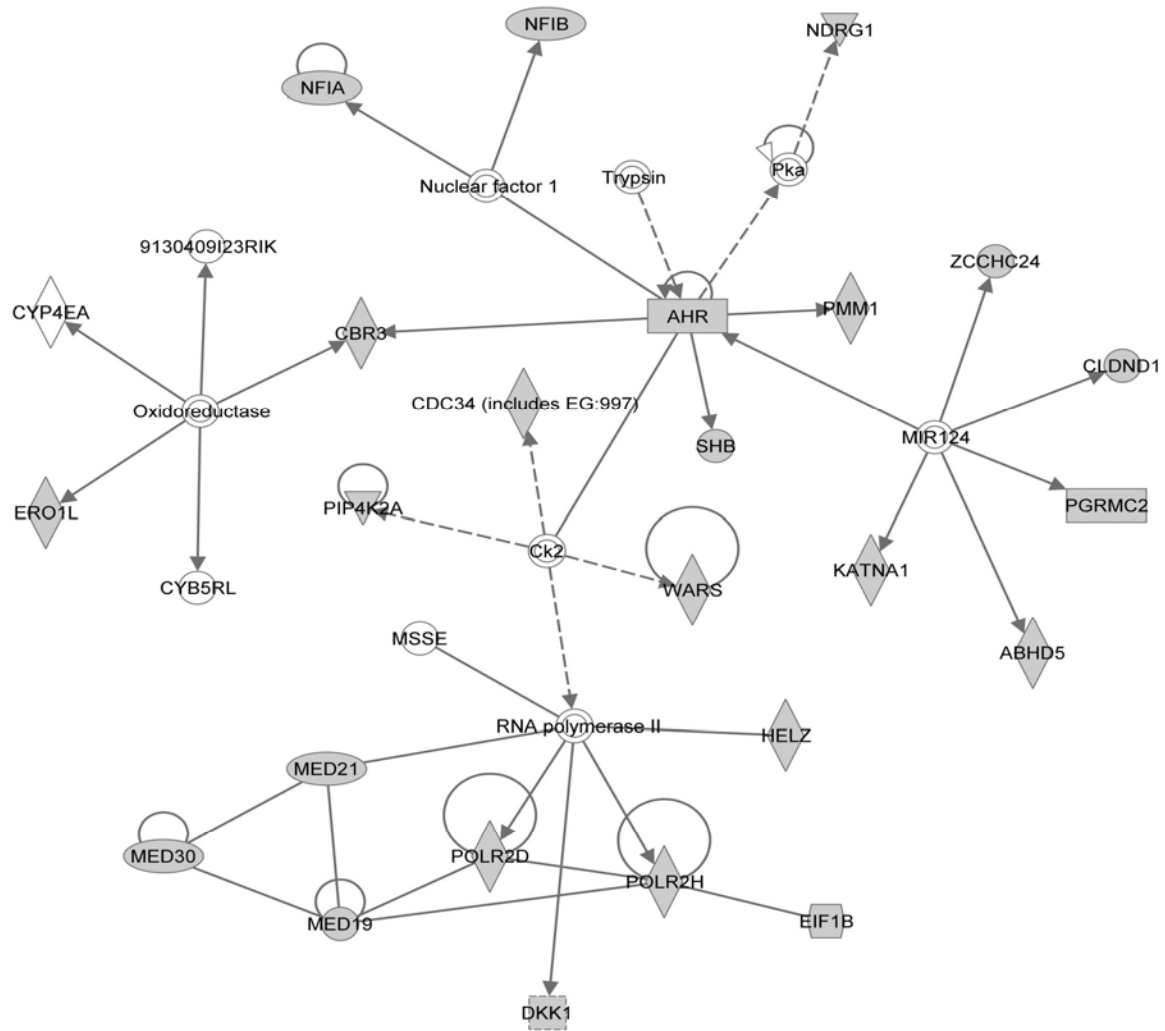

Network 4

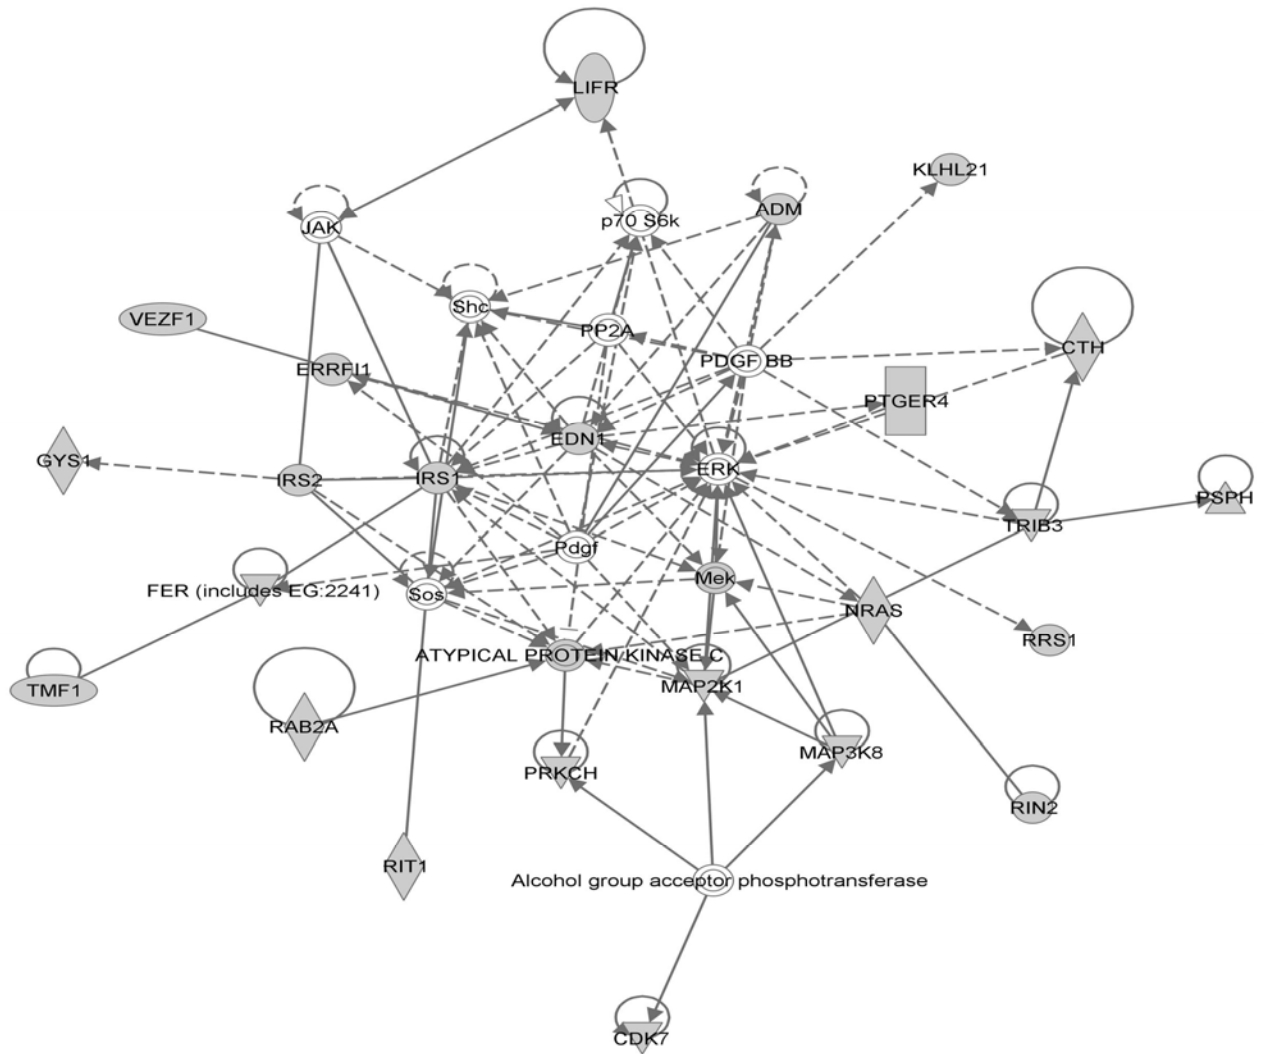

Network 5

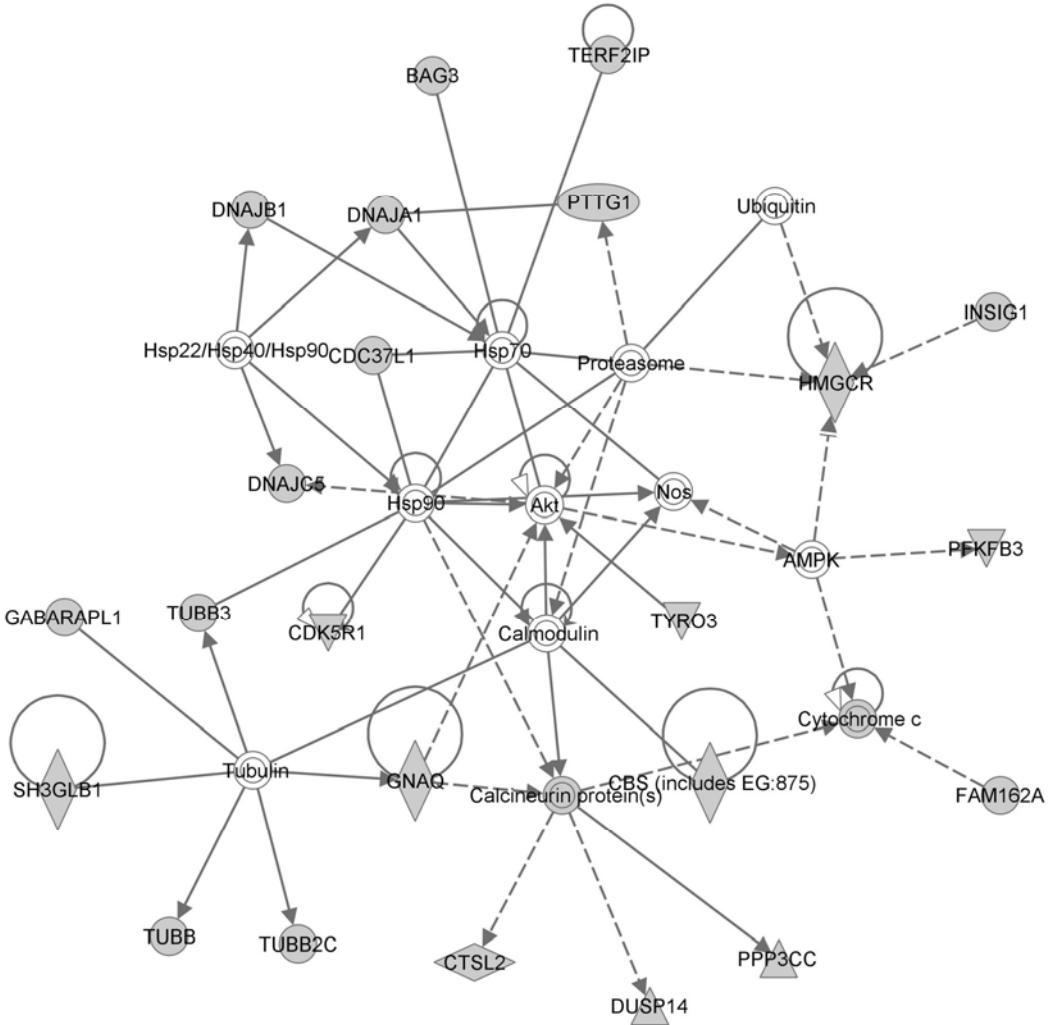

### Supplementary Figure 2

Microscopic images of Phalloidin (red) and DAPI (blue) stained control NCI-H460 and DAMTC treated cells clearly indicate the changes in cytoskeleton induced by DAMTC treatment. The images were taken at 60X using Nikon microscope.

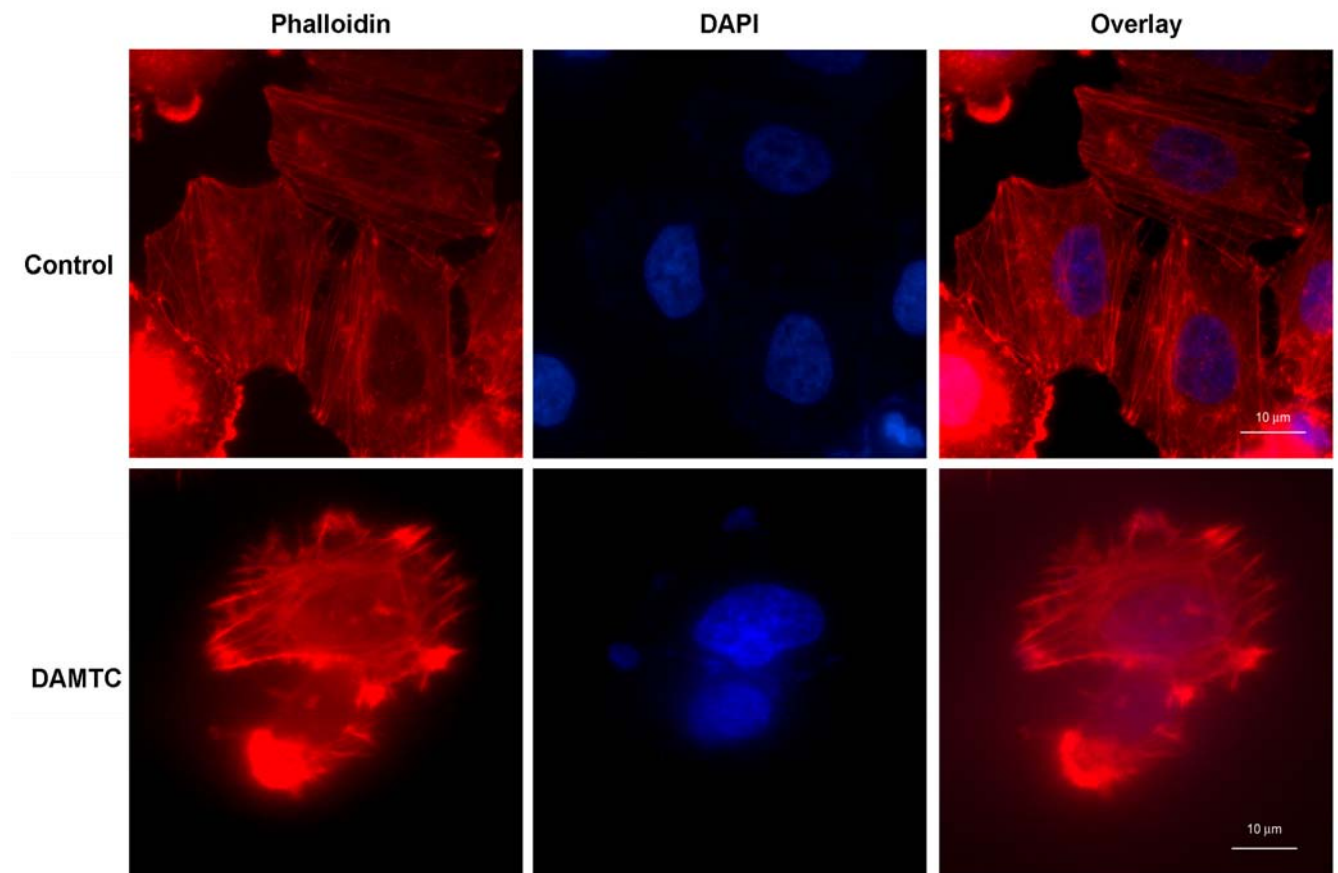

### Supplementary Figure 3

Wound healing assay in control and DAMTC treated NCI-H460 cells. The number of cells migrating in the wound increased in control NCI-H460 cells whereas fewer cells migrated in the wound area in DAMTC treated NCI-H460 cells and this migration was dose dependent.

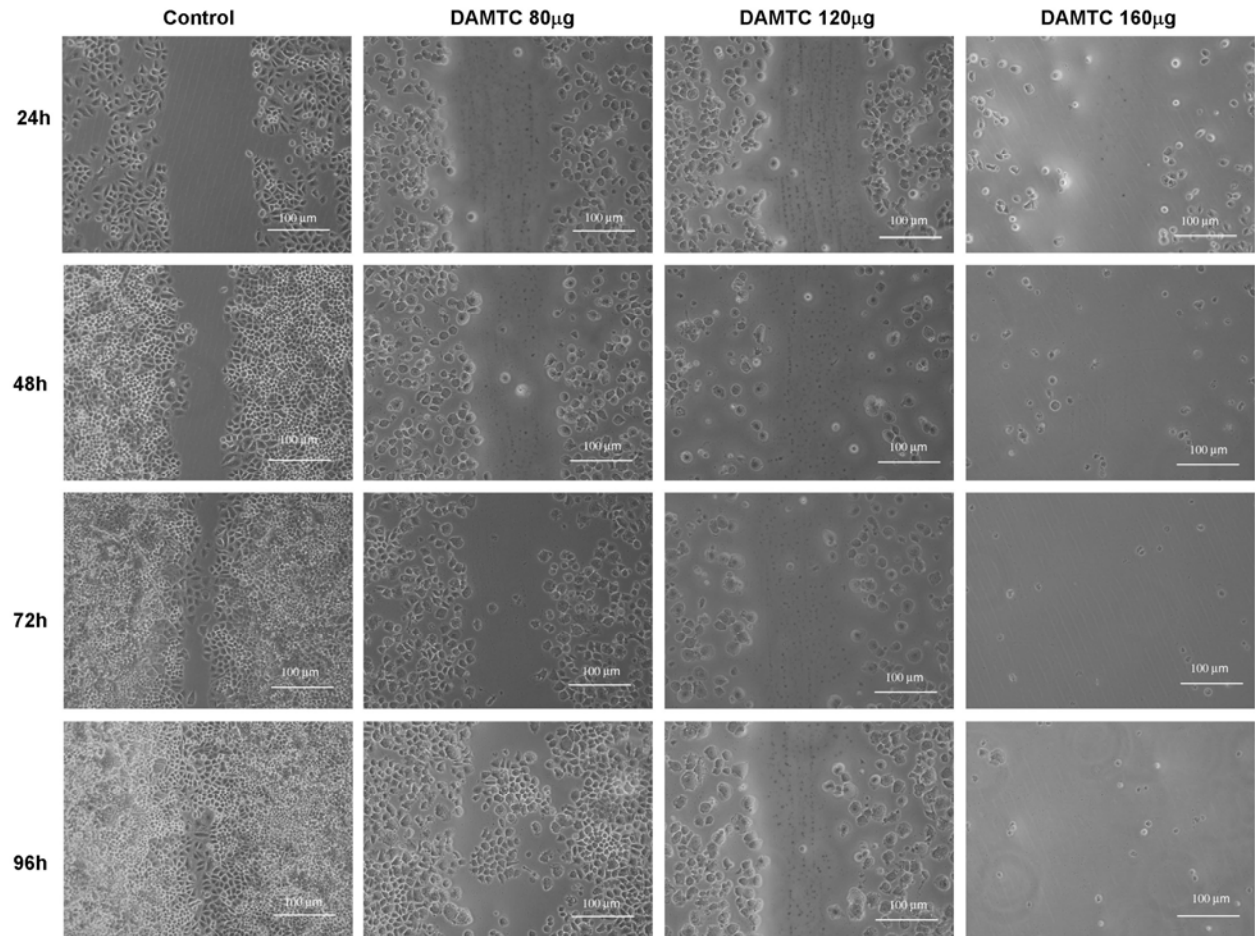

Supplement: cddis2012141x1.pdf [file cddis2012141x1.pdf]
